# Supplementary material
Source: PubMed Central journal article supplement (PMC3307811)

Supporting Information for

**Enantioselective Pictet-Spengler Reactions of Isatins for the Synthesis of Spiroindolones**

Joseph J. Badillo, Abel Silva-García, Benjamin H. Shupe, James C. Fettingner,  
Annaliese K. Franz\*

*Department of Chemistry  
One Shields Ave  
University of California  
Davis, CA 95616 USA  
E-mail: akfranz@ucdavis.edu*

## Experimental Section

**General Information:** All reactions were performed in oven-dried and argon-purged glassware.  $\text{Na}_2\text{SO}_4$  was activated in a vacuum chamber by heating them with a heat gun for ~15 min. All  $^1\text{H}$  and  $^{13}\text{C}$  spectra were recorded at ambient temperature at 400 (or 300, 600) and 100 (or 75, 150) MHz, respectively. The  $^1\text{H}$  spectral data are reported as follows: chemical shift in parts per million downfield from tetramethylsilane on the  $\delta$  scale, multiplicity (s, singlet; d, doublet; t, triplet; q, quartet; s, septet; m, multiplet; dd, doublet of doublets, dt doublets of triplets, td triplet of doublets, and bs, broad singlet), coupling constant (Hz), and integration. Carbon NMR chemical shifts are reported in ppm from tetramethylsilane with the solvent reference employed as the internal standard (deuteriochloroform ( $\text{CDCl}_3$ ) at 77.0 ppm).

All HPLC analyses were performed on a Shimadzu LC-20AB system with a Daicel CHIRALPAK® AD-H column (4.6 x 250 mm, 5  $\mu\text{m}$ ) or CHIRALPAK® OD-H column (4.6 x 250 mm, 5  $\mu\text{m}$ ) with a flow rate of 0.8 mL/min, unless otherwise indicated, (isopropanol/hexanes isocratic system) using Shimadzu SPD-M20A photodiode array detector and 25-40 °C column oven temperature. Compounds were analyzed for HRMS on a Thermo Fisher Orbitrap (San Jose, CA) using electrospray in the positive ion mode at >60,000 resolution and using typical ESI source values. These settings result in mass accuracies <5ppm. Compounds analyzed for MS (ESI) by an Applied Biosystems Qtrap (Foster City, CA) in the positive ion mode. Source parameters were 5kV spray voltage, with a curtain plate temperature of 275 °C and sheath gas setting of 15. Samples were analyzed via flow injection analysis by injecting 20 mL samples into a stream of 50% MeOH/20% aqueous formic acid (0.1%) flowing at 200 mL/min. When indicated, the progress of reactions was monitored by analytical thin layer chromatography using glass or aluminum backed plates pre-coated with EMD silica gel 60 F254 and visualized with UV light. Flash chromatography was performed either on Acros silica gel 60 Å (0.035-0.070 mm), Aldrich silica gel 150 Å grade 62 (60-200 mesh), or using a CombiFlash Companion system (Teledyne ISCO, Inc.) with pre-packed FLASH silica columns (RediSep, Rf® and RediSep, Rf® GOLD). Reactions at -15 °C were run in a low-temp freezer. Infrared spectra were recorded on a FTIR spectrophotometer Mattson Genesis II or Bruker Tensor 27. Optical rotations were obtained on a Rudolph AUTOPOL IV polarimeter at a wavelength of 589 nm (sodium D line) using a 1.0 dm cell. Specific rotations are reported in degrees per decimeter at 23-24 °C and the concentrations are given in grams per 100 mL of solvent. Solvents used for optical rotation was  $\text{CHCl}_3$  (stabilized with 0.5% - 1% EtOH, and filtered through basic alumina).

**General Procedures for Chiral-Acid Catalyzed Spirocyclization of Tryptamines with Isatins, Method A.** A solution of isatin (0.035 mmol, 1.2 equiv), tryptamine (0.03 mmol, 1.0 equiv) and (*R*)-3,3'-bis(9-anthracenyl)-1,1'-binaphthyl-2,2'-diyl hydrogenphosphate (0.006 mmol, 0.2 equiv) was prepared in dry CH<sub>2</sub>Cl<sub>2</sub> (0.06 M) at 25 °C in an oven-dried and Ar-purged 4 mL vial fitted with a magnetic stir bar. The reaction was stirred until it was complete as judged by TLC (80% EtOAc/hexanes). The reaction was then concentrated and loaded onto a flash silica gel column (gradient of EtOAc/hexanes ending in 80% EtOAc/hexanes) to afford the spiroindolone product.

**Method B.** A solution of isatin (0.05 mmol, 1.0 equiv), tryptamine (0.05 mmol, 1.0 equiv) and (*S*)-3,3'-bis(2,4,6-triisopropylphenyl)-1,1'-binaphthyl-2,2'-diyl hydrogenphosphate (0.005 mmol, 0.1 equiv) was prepared in dry DMF (0.2 M) at 40 °C in a 4 mL vial fitted with a magnetic stir bar. The reaction was stirred until it was complete as judged by TLC (10% EtOAc/DCM). The reaction was then diluted with ether (10 mL), washed with 10% K<sub>2</sub>CO<sub>3</sub> (2 x 5 mL), brine (10 mL), dried over MgSO<sub>4</sub>, filtered, and concentrated in *vacuo*. The resulting residue was purified by flash chromatography (gradient of EtOAc/hexanes ending in 80%EtOAc/hexanes) to afford the spiroindolone. NOTE: depending on substitution, additional useful column conditions include, gradient 100% DCM to 10-20% EtOAc/DCM, and 25% acetone/hexanes to 50% acetone/hexanes.

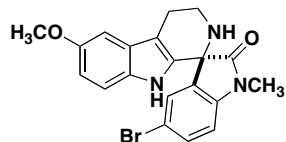

**(*S*)-5-bromo-6'-methoxy-1-methyl-2',3',4',9'-tetrahydrospiro[indoline-3,1'-pyrido[3,4-b]indol]-2-one (4aa):** The compound was prepared using both Method A and B, yielding a pink foamy solid; Method A (99%), Method B (70%). Enantiomeric ratio was determined by HPLC with a Daicel CHIRALPAK® AD-H column (20% IPA/hexanes), 0.8 mL/min. *t<sub>R</sub>* (major) = 24.0 min, *t<sub>R</sub>* (minor) = 18.7 min. Method A 92:8 er, [ $\alpha$ ]<sub>D</sub><sup>24</sup> -74.5 (*c* = 0.48, CHCl<sub>3</sub>). Method B 82:18 er. IR (neat, selected peaks):  $\nu_{max}$  3293, 3074, 2929, 1633, 1466, 1088 cm<sup>-1</sup>. <sup>1</sup>H NMR (400 MHz, CDCl<sub>3</sub>)  $\delta$  7.49 (dd, *J* = 8.3, 2.0, 1H), 7.32 (d, *J* = 2.0, 1H), 7.18 (s, 1H), 7.07 (d, *J* = 8.7, 1H), 7.01 (d, *J* = 2.4, 1H), 6.81 (m, 2H), 3.86 (s, 3H), 3.81 (m, 1H), 3.32 (dt, *J* = 13.3, 5.4, 1H), 3.25 (s, 3H), 2.93 (t, *J* = 5.7, 2H), 2.05 (bs, 1H). <sup>13</sup>C NMR (100 MHz, CDCl<sub>3</sub>)  $\delta$  176.3, 154.5, 142.7, 133.7, 132.9, 131.5, 130.2, 128.2, 127.7, 116.3, 112.9, 112.0, 110.4, 100.9, 61.8, 56.2, 40.3, 26.9, 22.3. Exact mass calculated for C<sub>20</sub>H<sub>19</sub>BrN<sub>3</sub>O<sub>2</sub> [M + H]<sup>+</sup>, 412.0655, Found 412.0656. Recrystallization from DCM layered with hexanes and EtOAc afforded single crystals. The

absolute stereochemistry and structure was confirmed by X-ray analysis.

#### Racemic standard for (4aa)

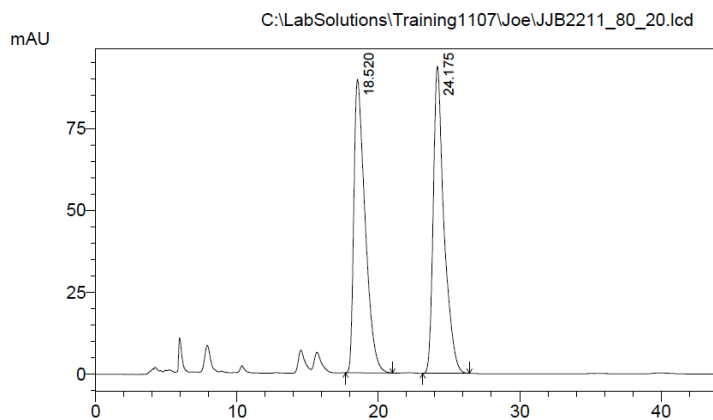

1 PDA Multi 1/254nm 4nm

#### < Peak Table >

PeakTable C:\LabSolutions\Training1107\Joe\JJB2211\_80\_20.lcd

| Peak# | Ret. Time | Area    | Height | Area %  | Height % |
|-------|-----------|---------|--------|---------|----------|
| 1     | 18.520    | 4961772 | 89517  | 49.994  | 48.852   |
| 2     | 24.175    | 4962917 | 93724  | 50.006  | 51.148   |
| Total |           | 9924689 | 183242 | 100.000 | 100.000  |

#### Enantiomerically enriched (4aa) (Method A, 91:9 er)

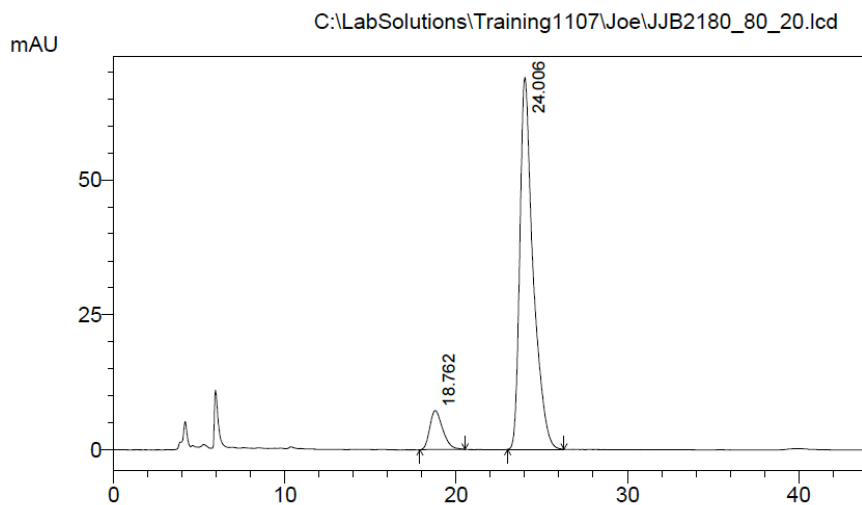

1 PDA Multi 1/254nm 4nm

#### < Peak Table >

PeakTable C:\LabSolutions\Training1107\Joe\JJB2180\_80\_20.lcd

| Peak# | Ret. Time | Area    | Height | Area %  | Height % |
|-------|-----------|---------|--------|---------|----------|
| 1     | 18.762    | 379432  | 7239   | 9.271   | 9.506    |
| 2     | 24.006    | 3713244 | 68913  | 90.729  | 90.494   |
| Total |           | 4092676 | 76152  | 100.000 | 100.000  |

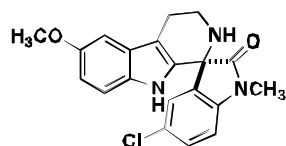

**(S)-5-chloro-6'-methoxy-1-methyl-2',3',4',9'-tetrahydrospiro[indoline-3,1'-pyrido[3,4-b]indol]-2-one (4ba):** The compound was prepared using both Method A and B, yielding a pink foamy solid; Method A (99%), Method B (90%). Enantiomeric ratio was determined by HPLC with a Daicel CHIRALPAK® AD-H column (30% IPA/hexanes), 0.8 mL/min.  $t_R$  (major) = 14.5 min,  $t_R$  (minor) = 11.4 min. Method A 98:2 er,  $[\alpha]_D^{24}$   $-66.1^\circ$  ( $c = 0.3$ ,  $\text{CHCl}_3$ ). Method B 88:12 er. IR (neat, selected peaks):  $\nu_{\max}$  3267, 2922, 2853, 1609, 1455, 1210, 813  $\text{cm}^{-1}$ .  $^1\text{H}$  NMR (400 MHz,  $\text{CDCl}_3$ )  $\delta$  7.33 (dd,  $J = 8.3, 2.1$ , 1H), 7.18 (d,  $J = 2.1$ , 1H), 7.06 – 6.98 (m, 2H), 6.86 – 6.76 (m, 2H), 3.85 (s, 3H), 3.80 (ddd,  $J = 13.2, 6.8, 5.0$ , 1H), 3.31 (dt,  $J = 13.2, 5.4$ , 1H), 3.22 (s, 3H), 2.92 (t,  $J = 5.7$ , 2H).  $^{13}\text{C}$  NMR (100 MHz,  $\text{CDCl}_3$ )  $\delta$  176.2, 154.2, 142.0, 133.1, 131.3, 129.7, 128.8, 127.5, 125.2, 112.7, 112.6, 111.7, 109.6, 100.7, 61.6, 56.0, 40.0, 26.7, 22.1. Exact mass calculated for  $\text{C}_{20}\text{H}_{19}\text{ClN}_3\text{O}_2$   $[\text{M} + \text{H}]^+$ , 368.1166, Found 368.1164.

Racemic standard (**4ba**)

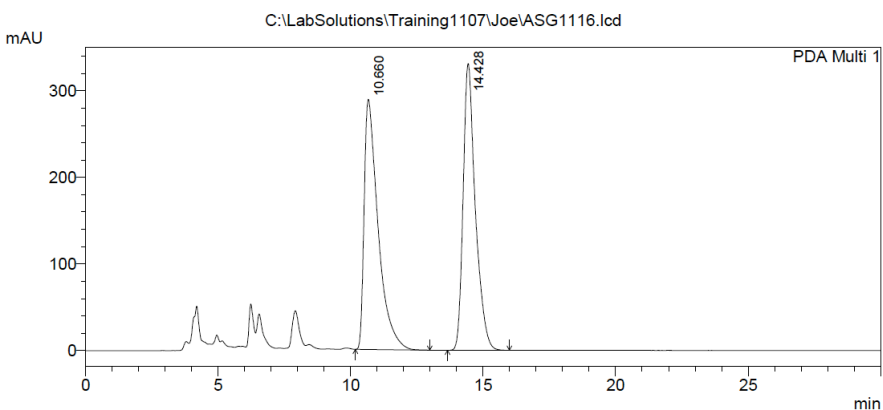

1 PDA Multi 1/254nm 4nm

< Peak Table >

PeakTable C:\LabSolutions\Training1107\Joe\ASG1116.lcd

| Peak# | Ret. Time | Area     | Height | Area %  | Height % |
|-------|-----------|----------|--------|---------|----------|
| 1     | 10.660    | 10575193 | 288833 | 49.927  | 46.601   |
| 2     | 14.428    | 10606269 | 330961 | 50.073  | 53.399   |
| Total |           | 21181461 | 619794 | 100.000 | 100.000  |

Enantiomerically enriched (**4ba**) (Method A, 92:8 er)

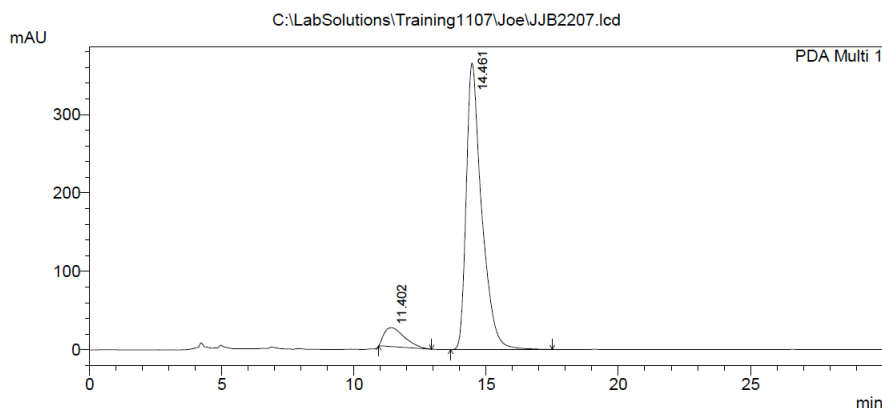

< Peak Table >

PeakTable C:\LabSolutions\Training1107\Joe\JJB2207.lcd

| Peak# | Ret. Time | Area     | Height | Area %  | Height % |
|-------|-----------|----------|--------|---------|----------|
| 1     | 11.402    | 1296557  | 24083  | 8.072   | 6.187    |
| 2     | 14.461    | 14766764 | 365143 | 91.928  | 93.813   |
| Total |           | 16063321 | 389226 | 100.000 | 100.000  |

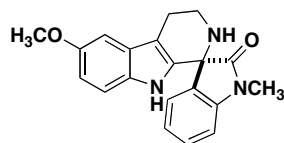

**(S)-6'-methoxy-1-methyl-2',3',4',9'-tetrahydrospiro[indoline-3,1'-pyrido[3,4-b]indol]-2-one**

**(4ca):** The compound was prepared using both Method A and B, yielding a white foamy solid; Method A (99%), Method B (99%). Enantiomeric ratio was determined by HPLC with a Daicel CHIRALPAK® AD-H column (30% IPA/hexanes), 0.8 mL/min.  $t_R$  (major) = 24.5 min,  $t_R$  (minor) = 13.4 min. Method A 88:12 er. Method B 95:5 er,  $[\alpha]_D^{23}$  -17.2° ( $c$  = 0.27,  $\text{CHCl}_3$ ). IR (neat, selected peaks):  $\nu_{\text{max}}$  3298, 3269, 2898, 1681, 1610, 1468, 1376, 1211, 1102  $\text{cm}^{-1}$ ;  $^1\text{H}$  NMR (400 MHz,  $\text{CDCl}_3$ )  $\delta$  7.37 (td,  $J$  = 7.8, 1.2, 1H), 7.20 (d,  $J$  = 7.4, 1H), 7.17 (s, 1H), 7.07 – 7.03 (m, 2H), 7.01 (d,  $J$  = 2.4, 1H), 6.93 (d,  $J$  = 7.8, 1H), 6.79 (dd,  $J$  = 8.7, 2.5, 1H), 3.90 – 3.81 (m, 4H), 3.35 (dt,  $J$  = 12.8, 5.4, 1H), 3.27 (s, 3H), 2.94 (t,  $J$  = 5.7, 2H), 1.70 (bs, 1H).  $^{13}\text{C}$  NMR (100 MHz,  $\text{CDCl}_3$ )  $\delta$  176.8, 154.4, 143.7, 131.6, 131.4, 131.1, 130.1, 127.8, 124.9, 123.6, 112.6, 111.9, 108.9, 100.9, 61.7, 56.2, 40.2, 26.8, 22.4. Exact mass calculated for  $\text{C}_{20}\text{H}_{20}\text{N}_3\text{O}_2$  [ $\text{M} + \text{H}$ ] $^+$ , 334.1556, Found 334.1548.

## Racemic standard (**4ca**)

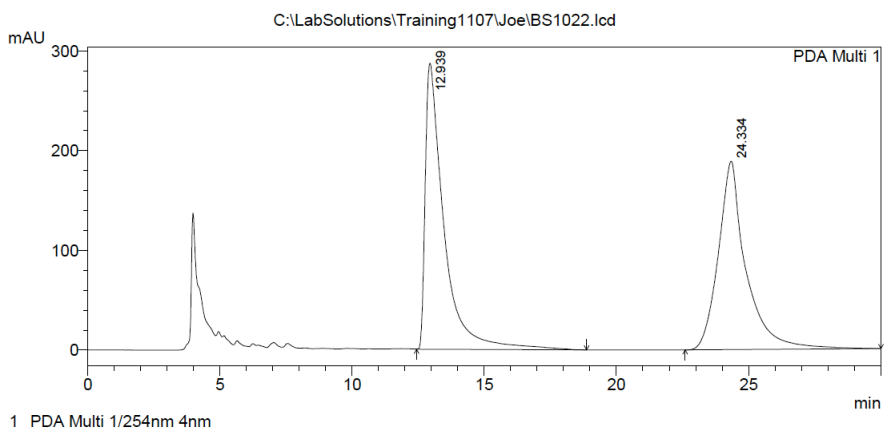

### < Peak Table >

PeakTable C:\LabSolutions\Training1107\Joe\BS1022.lcd

| Peak# | Ret. Time | Area     | Height | Area %  | Height % |
|-------|-----------|----------|--------|---------|----------|
| 1     | 12.939    | 14094960 | 286919 | 50.584  | 60.288   |
| 2     | 24.334    | 13769273 | 188998 | 49.416  | 39.712   |
| Total |           | 27864233 | 475918 | 100.000 | 100.000  |

## Enantiomerically enriched (**4ca**) (Method B 90:10 er)

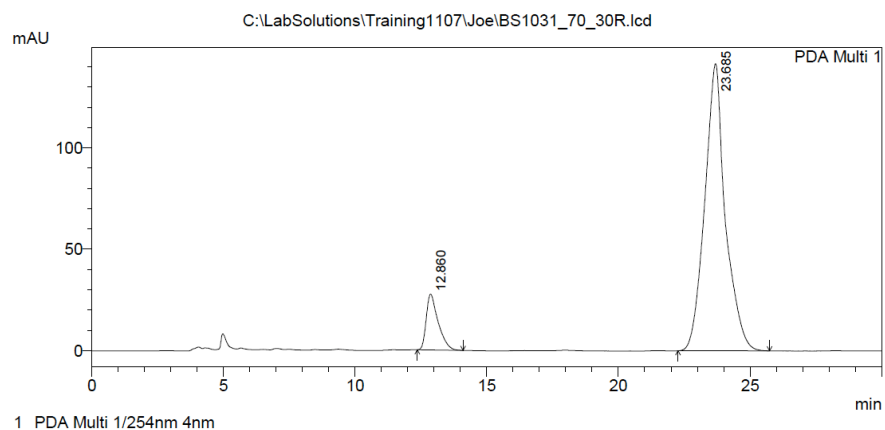

### < Peak Table >

PeakTable C:\LabSolutions\Training1107\Joe\BS1031\_70\_30R.lcd

| Peak# | Ret. Time | Area    | Height | Area %  | Height % |
|-------|-----------|---------|--------|---------|----------|
| 1     | 12.860    | 861353  | 27494  | 10.081  | 16.281   |
| 2     | 23.685    | 7682716 | 141380 | 89.919  | 83.719   |
| Total |           | 8544069 | 168874 | 100.000 | 100.000  |

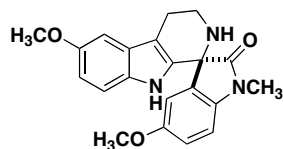

**(*S*)-1-methyl-5-methoxy-6'-methoxy-2',3',4',9'-tetrahydrospiro[indoline-3,1'-pyrido[3,4-*b*]indol]-2-one (4da).** The compound was prepared using both Method A and B, yielding a white solid; Method A (99%), Method B (79%). Enantiomeric excess was determined by HPLC with a Daicel CHIRALPAK® AD-H column (20% IPA/hexanes), 0.8 mL/min.  $t_R$  (major) = 54.8 min,  $t_R$  (minor) = 36.7 min. Method A 58:42 er. Method B 70:30 er,  $[\alpha]_D^{23}$  -63.2° ( $c$  = 0.44, CHCl<sub>3</sub>). IR (neat, selected peaks):  $\nu_{max}$  3302, 2924, 2841, 1720, 1495, 2114, 1169, 1028, 812 cm<sup>-1</sup>. <sup>1</sup>H NMR (400 MHz, CDCl<sub>3</sub>)  $\delta$  7.31 (s, 1H), 7.01 (dd,  $J$  = 10.4, 5.5, 2H), 6.83 (s, 1H), 6.87 (dd,  $J$  = 8.5, 2.4, 1H), 6.84 – 6.75 (m, 1H), 3.91 – 3.81 (m, 4H), 3.69 (s, 3H), 3.35 – 3.27 (m, 1H), 3.21 (s, 3H), 2.92 (t,  $J$  = 5.7, 2H), 2.00 (bs, 1H). <sup>13</sup>C NMR (100 MHz, CDCl<sub>3</sub>)  $\delta$  176.7, 156.8, 154.3, 137.0, 132.8, 131.5, 131.1, 127.8, 114.9, 112.6, 112.4, 111.9, 111.6, 109.4, 100.9, 62.1, 56.2, 56.1, 40.3, 26.8, 22.3. Exact mass calculated for C<sub>21</sub>H<sub>22</sub>N<sub>3</sub>O<sub>3</sub> [M + H]<sup>+</sup>, 364.1656, Found 364.1656.

Enantiomerically enriched (**4da**) (Method A, 58:42 er)

ining1107\Joe\JJB2239\_mc.lcd

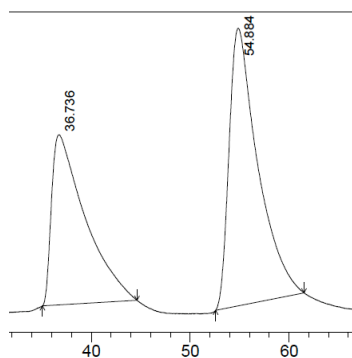

1 PDA Multi 1/254nm 4nm

< Peak Table >

PeakTable C:\LabSolutions\Training1107\Joe\JJB2239\_mc.lcd

| Peak# | Ret. Time | Area    | Height | Area %  | Height % |
|-------|-----------|---------|--------|---------|----------|
| 1     | 36.736    | 1912955 | 8104   | 41.725  | 38.009   |
| 2     | 54.884    | 2671672 | 13217  | 58.275  | 61.991   |
| Total |           | 4584627 | 21321  | 100.000 | 100.000  |

Enantiomerically enriched (**4da**) (Method B, 70:30 er)

1g1107\Joe\JJB2240\_mc.lcd

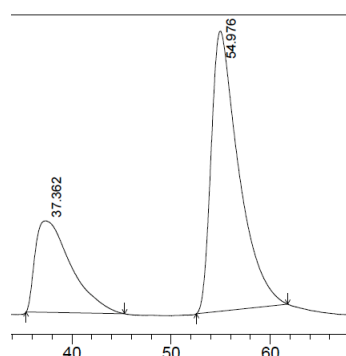

1 PDA Multi 1/254nm 4nm

< Peak Table >

PeakTable C:\LabSolutions\Training\1107\Joe\JJB2240\_mc.lcd

PDA Ch1 254nm 4nm

| Peak# | Ret. Time | Area    | Height | Area %  | Height % |
|-------|-----------|---------|--------|---------|----------|
| 1     | 37.362    | 2167816 | 8601   | 29.806  | 24.634   |
| 2     | 54.976    | 5105278 | 26316  | 70.194  | 75.366   |
| Total |           | 7273094 | 34917  | 100.000 | 100.000  |

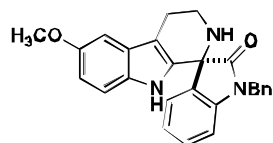

**(S)-1-benzyl-6'-methoxy-2',3',4',9'-tetrahydrospiro[indoline-3,1'-pyrido[3,4-*b*]indol]-2-one**

**(4ea):** The compound was prepared using both Method A and B, yielding a pink foamy solid; Method A (99%), Method B (95%). Enantiomeric ratio was determined by HPLC with a Daicel CHIRALPAK® AD-H column (30% IPA/hexanes), 0.8 mL/min.  $t_R$  (major) = 12.6 min,  $t_R$  (minor) = 19.6 min. Method A 82:18 er. Method B 96:4,  $[\alpha]_D^{24}$   $-21.3^\circ$  ( $c = 0.41$ ,  $\text{CHCl}_3$ ). IR (neat, selected peaks):  $\nu_{\max}$  3279, 3342, 1684, 1610, 1454, 1216, 1175, 986  $\text{cm}^{-1}$ .  $^1\text{H}$  NMR (400 MHz,  $\text{CDCl}_3$ )  $\delta$  7.37 – 7.13 (m, 8H), 6.99 (m, 3H), 6.82 (d,  $J = 7.8$ , 1H), 6.77 (dd,  $J = 8.8$ , 2.4, 1H), 4.94 (d,  $J = 15.5$ , 1H), 4.85 (d,  $J = 15.5$ , 1H), 3.90 (dt,  $J = 18.8$ , 6.0, 1H), 3.85 (s, 3H), 3.34 (dt,  $J = 13.1$ , 5.2, 1H), 2.94 (t,  $J = 5.7$ , 2H), 2.16 (b, 1H).  $^{13}\text{C}$  NMR (100 MHz,  $\text{CDCl}_3$ )  $\delta$  177.0, 154.4, 142.8, 136.0, 131.7, 131.6, 131.3, 129.9, 129.2, 128.1, 127.9, 127.8, 125.0, 123.6, 112.6, 112.0, 109.8, 100.9, 61.7, 56.2, 44.2, 40.3, 22.4. Exact mass calculated for  $\text{C}_{26}\text{H}_{24}\text{N}_3\text{O}_2$   $[\text{M} + \text{H}]^+$ , 410.1869, LRMS Found 410.2.

## Racemic standard for (4ea)

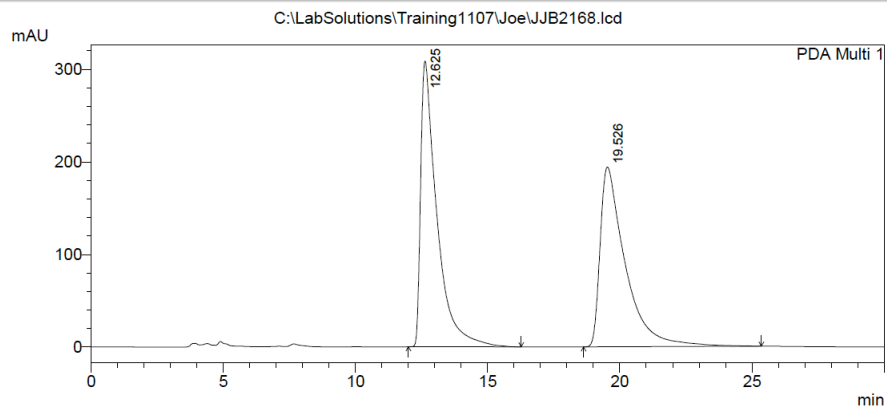

### < Peak Table >

PeakTable C:\LabSolutions\Training1107\Joe\JJB2168.lcd

PDA Ch1 254nm 4nm

| Peak# | Ret. Time | Area     | Height | Area %  | Height % |
|-------|-----------|----------|--------|---------|----------|
| 1     | 12.625    | 13180963 | 308706 | 50.556  | 61.371   |
| 2     | 19.526    | 12891254 | 194309 | 49.444  | 38.629   |
| Total |           | 26072217 | 503014 | 100.000 | 100.000  |

## Enantiomerically enriched (4ea) (Method B, 96:4 er)

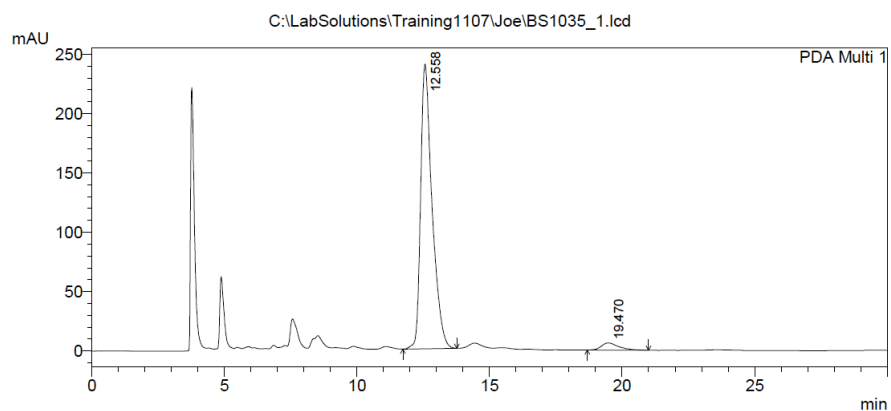

### < Peak Table >

PeakTable C:\LabSolutions\Training1107\Joe\BS1035\_1.lcd

PDA Ch1 254nm 4nm

| Peak# | Ret. Time | Area    | Height | Area %  | Height % |
|-------|-----------|---------|--------|---------|----------|
| 1     | 12.558    | 7193270 | 239753 | 96.252  | 97.521   |
| 2     | 19.470    | 280083  | 6094   | 3.748   | 2.479    |
| Total |           | 7473353 | 245847 | 100.000 | 100.000  |

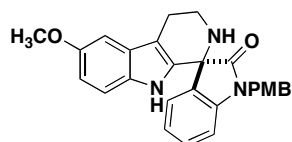

**(S)-6'-methoxy-1-(4-methoxyphenyl)-2',3',4',9'-tetrahydrospiro[indoline-3,1'-pyrido[3,4-b]indol]-2-one (4fa):** The compound was prepared using both Method A and B, yielding a white solid; Method A (72%), Method B (87%). Enantiomeric ratio was determined by HPLC with a Daicel CHIRALPAK® AD-H column (30% IPA/hexanes), 0.8 mL/min.  $t_R$  (major) = 19.7 min,  $t_R$  (minor) = 26.5 min. Method A 87:13. Method B 93:7 er,  $[\alpha]_D^{24}$  -38.5° ( $c$  = 0.32,  $\text{CHCl}_3$ ). IR (neat, selected peaks):  $\nu_{\text{max}}$  2924, 1704, 1606, 1459, 1244, 1169, 1027  $\text{cm}^{-1}$ .  $^1\text{H}$  NMR (300 MHz,  $\text{CDCl}_3$ )  $\delta$  7.28 (dd,  $J$  = 7.6, 4.9, 1H), 7.23 (dd,  $J$  = 7.7, 1.3, 1H), 7.18 (d,  $J$  = 7.4, 2H), 7.13 (s, 1H), 7.05 – 6.94 (m, 4H), 6.91 – 6.84 (m, 2H), 6.82 – 6.75 (m, 1H), 4.92 (d,  $J$  = 15.2, 1H), 4.78 (d,  $J$  = 15.2, 1H), 3.97 – 3.83 (m, 4H), 3.79 (s, 3H), 3.35 (dt,  $J$  = 11.5, 5.2, 1H), 2.94 (t,  $J$  = 5.7, 1H), 2.0 (bs, 1H).  $^{13}\text{C}$  NMR (75 MHz,  $\text{CDCl}_3$ )  $\delta$  177.0, 159.5, 154.4, 142.8, 131.8, 131.5, 131.3, 129.9, 129.2, 128.1, 127.9, 124.9, 123.5, 114.5, 112.6, 112.5, 111.9, 109.9, 100.9, 61.7, 56.2, 55.5, 43.7, 40.4, 22.4. Exact mass calculated for  $\text{C}_{27}\text{H}_{26}\text{N}_3\text{O}_3$   $[\text{M} + \text{H}]^+$ , 440.1974, LRMS Found 440.2.

Enantiomerically enriched (**4fa**) (Method A, 87:13 er)

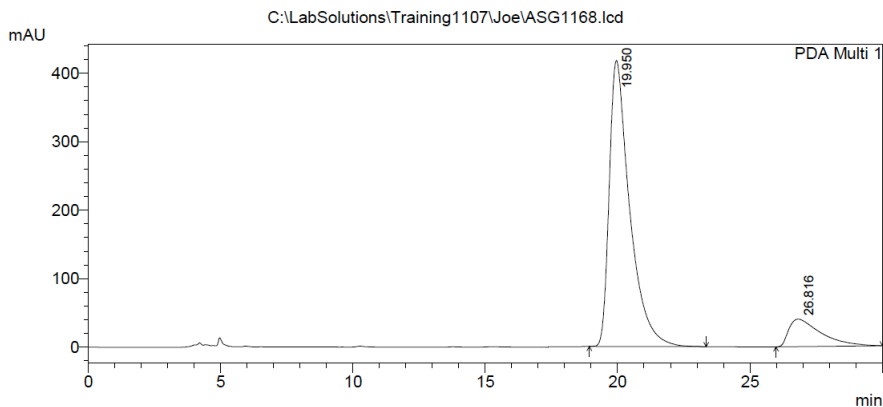

1 PDA Multi 1/254nm 4nm

< Peak Table >

PeakTable C:\LabSolutions\Training1107\Joe\ASG1168.lcd

PDA Ch1 254nm 4nm

| Peak# | Ret. Time | Area     | Height | Area %  | Height % |
|-------|-----------|----------|--------|---------|----------|
| 1     | 19.950    | 22458067 | 417832 | 86.929  | 91.267   |
| 2     | 26.816    | 3376880  | 39979  | 13.071  | 8.733    |
| Total |           | 25834947 | 457811 | 100.000 | 100.000  |

## Enantiomerically enriched (**4fa**) (Method B 93:7 er)

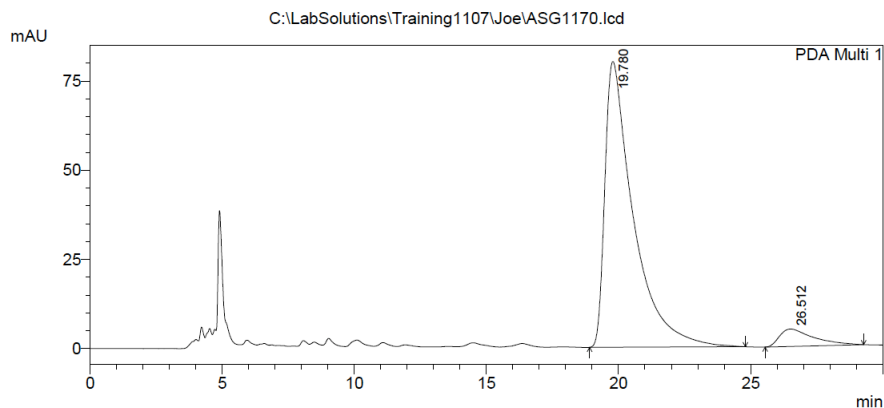

1 PDA Multi 1/254nm 4nm

< Peak Table >

PeakTable C:\LabSolutions\Training1107\Joe\ASG1170.lcd

| Peak# | Ret. Time | Area    | Height | Area %  | Height % |
|-------|-----------|---------|--------|---------|----------|
| 1     | 19.780    | 6011112 | 80142  | 93.280  | 94.276   |
| 2     | 26.512    | 433065  | 4866   | 6.720   | 5.724    |
| Total |           | 6444176 | 85008  | 100.000 | 100.000  |

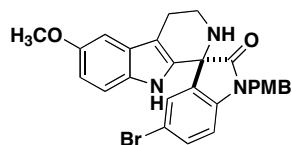

### (*S*)-5-bromo-6'-methoxy-1-(4-methoxyphenyl)-2',3',4',9'-tetrahydrospiro[indoline-3,1'-

**pyrido[3,4-*b*]indol]-2-one (**4ga**):** The compound was prepared using both Method A and B, yielding a pink foamy solid; Method A (86%), Method B (81%). Enantiomeric ratio was determined by HPLC with a Daicel CHIRALPAK® AD-H column (30% IPA/hexanes), 0.8 mL/min.  $t_R$  (major) = 13.1 min,  $t_R$  (minor) = 20.1 min. Method A 87:13 er,  $[\alpha]_D^{24}$  -48.7° ( $c$  = 0.68, CHCl<sub>3</sub>). Method B 75:25 er. IR (neat, selected peaks):  $\nu_{max}$  3347, 2923, 1682, 1476, 1173, 1026, 820 cm<sup>-1</sup>. <sup>1</sup>H NMR (400 MHz, CDCl<sub>3</sub>)  $\delta$  7.35 (d,  $J$  = 8.3, 1.9, 1H), 7.30 (d,  $J$  = 1.9, 1H), 7.26 (d,  $J$  = 8.6, 1H), 7.13 (s, 1H), 7.05 (d,  $J$  = 8.8, 1H), 7.01 (d,  $J$  = 2.4, 1H), 6.90 – 6.84 (m, 2H), 6.80 (dd,  $J$  = 8.8, 2.4, 1H), 6.72 (d,  $J$  = 8.3, 1H), 4.83 (dd,  $J$  = 47.0, 15.3, 2H), 3.86 (s, 3H), 3.79 (s, 3H), 3.39 – 3.27 (m, 1H), 2.94 (t,  $J$  = 5.6, 2H), 1.98 (bs, 1H). <sup>13</sup>C NMR (100 MHz, CDCl<sub>3</sub>)  $\delta$  176.7, 159.7, 154.6, 141.8, 132.9, 132.7, 131.5, 129.1, 128.2, 127.7, 127.6, 116.3, 114.6, 113.0, 112.0, 111.4, 106.1, 105.5, 101.0, 61.9, 56.3, 55.5, 44.1, 40.5, 22.4. Exact mass calculated for C<sub>27</sub>H<sub>25</sub>BrN<sub>3</sub>O<sub>3</sub> [M + H]<sup>+</sup>, 518.1074, Found 518.1069.

## Racemic standard (**4ga**)

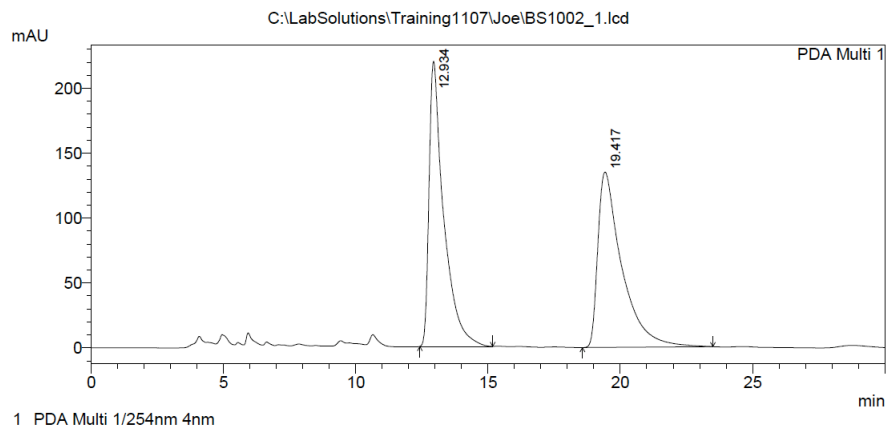

< Peak Table >

PeakTable C:\LabSolutions\Training1107\Joe\BS1002\_1.lcd

| Peak# | Ret. Time | Area     | Height | Area %  | Height % |
|-------|-----------|----------|--------|---------|----------|
| 1     | 12.934    | 8458493  | 219878 | 49.801  | 61.924   |
| 2     | 19.417    | 8526020  | 135200 | 50.199  | 38.076   |
| Total |           | 16984513 | 355078 | 100.000 | 100.000  |

## Enantiomerically enriched **4ga** (Method A, 87:13 er)

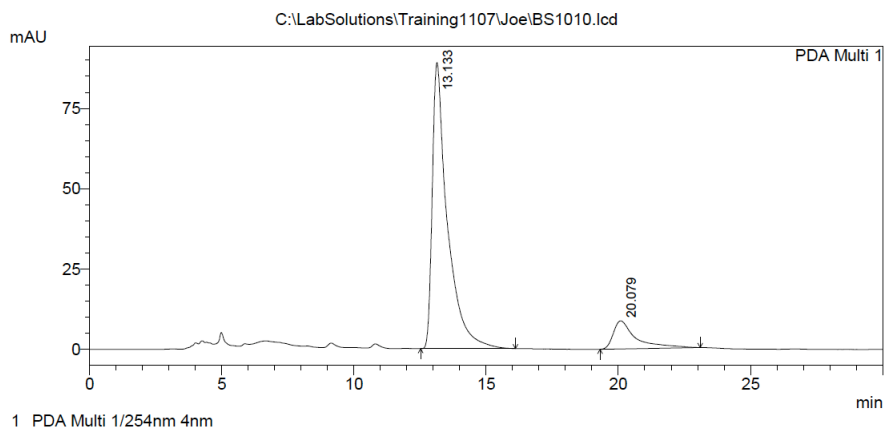

< Peak Table >

PeakTable C:\LabSolutions\Training1107\Joe\BS1010.lcd

| Peak# | Ret. Time | Area    | Height | Area %  | Height % |
|-------|-----------|---------|--------|---------|----------|
| 1     | 13.133    | 3548848 | 89133  | 87.190  | 91.065   |
| 2     | 20.079    | 521386  | 8745   | 12.810  | 8.935    |
| Total |           | 4070235 | 97878  | 100.000 | 100.000  |

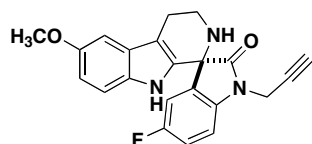

**(S)-5-fluoro-1-propargyl-6'-methoxy-2',3',4',9'-tetrahydrospiro[indoline-3,1'-pyrido[3,4-b]indol]-2-one (4ha).** The compound was prepared using both Method A and B, yielding a white foamy solid; Method A (60%), Method B (86%). Enantiomeric ratio was determined by HPLC with a Daicel CHIRALPAK® AD-H column (30% IPA/hexanes), 0.8 mL/min.  $t_R$  (major) = 9.0 min,  $t_R$  (minor) = 11.1 min. Method A 92:8 er. Method B 92:8 er,  $[\alpha]_D^{24}$  -12.2° ( $c$  = 0.27, CHCl<sub>3</sub>). IR (neat, selected peaks):  $\nu_{max}$  3296, 3193, 1977, 1696, 1485, 1173, 1028 cm<sup>-1</sup>. <sup>1</sup>H NMR (400 MHz, CDCl<sub>3</sub>)  $\delta$  7.32 (s, 1H), 7.12 – 6.93 (m, 6H), 6.78 (dd,  $J$  = 8.8, 1.8, 1H), 4.57 (dd,  $J$  = 17.7, 2.3, 1H), 4.45 (dd,  $J$  = 17.7, 2.5, 1H), 3.90 – 3.78 (m, 4H), 3.30 (dt,  $J$  = 10.8, 5.2, 1H), 2.92 (t,  $J$  = 6.7, 2H), 2.31 (t,  $J$  = 2.4, 1H). <sup>13</sup>C NMR (100 MHz, CDCl<sub>3</sub>)  $\delta$  175.8, 160.0 (d,  $J_{FC}$  = 243.3 Hz), 154.4, 137.6, 133.1 (d,  $J_{FCCC}$  = 7.5 Hz), 131.5, 130.1, 127.7, 116.4 (d,  $J_{FCC}$  = 23.7 Hz), 113.2 (d,  $J_{FCC}$  = 25.0 Hz), 112.9, 112.8, 112.0, 110.7 (d,  $J_{FCCC}$  = 7.9 Hz), 100.9, 76.7, 73.3, 62.0, 56.2, 40.2, 29.9, 22.2. Exact mass calculated for C<sub>22</sub>H<sub>19</sub>FN<sub>3</sub>O<sub>2</sub> [M + H]<sup>+</sup>, 376.1461, LRMS Found 376.2. Recrystallization from DCM layered with hexanes and EtOAc afforded single crystals. The absolute stereochemistry and structure was confirmed by X-ray analysis.

#### Racemic standard (4ha)

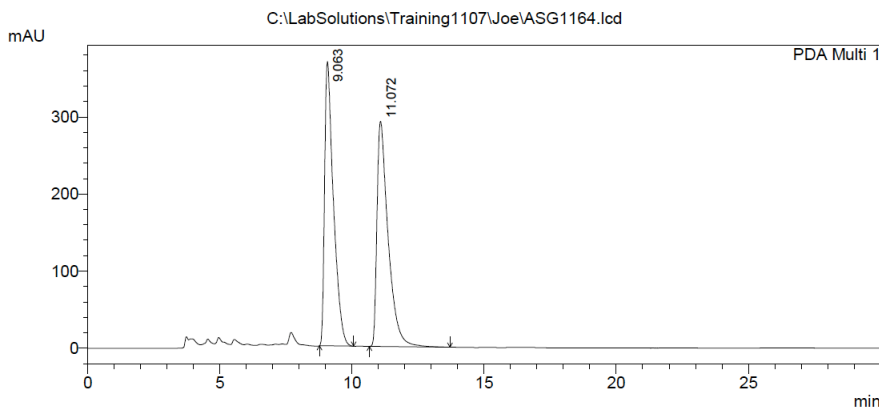

1 PDA Multi 1/254nm 4nm

#### < Peak Table >

PeakTable C:\LabSolutions\Training1107\Joe\ASG1164.lcd

| Peak# | Ret. Time | Area     | Height | Area %  | Height % |
|-------|-----------|----------|--------|---------|----------|
| 1     | 9.063     | 8555398  | 368613 | 49.966  | 55.805   |
| 2     | 11.072    | 8566928  | 291925 | 50.034  | 44.195   |
| Total |           | 17122326 | 660538 | 100.000 | 100.000  |

Enantiomerically enriched (**4ha**) (Method A, 92:8 er)

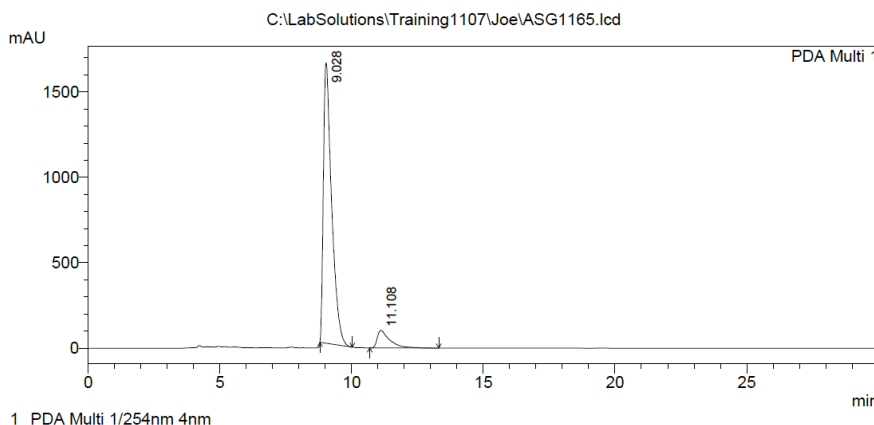

< Peak Table >

PeakTable C:\LabSolutions\Training1107\Joe\ASG1165.lcd

| Peak# | Ret. Time | Area     | Height  | Area %  | Height % |
|-------|-----------|----------|---------|---------|----------|
| 1     | 9.028     | 35654086 | 1642103 | 91.522  | 94.150   |
| 2     | 11.108    | 3302569  | 102040  | 8.478   | 5.850    |
| Total |           | 38956655 | 1744142 | 100.000 | 100.000  |

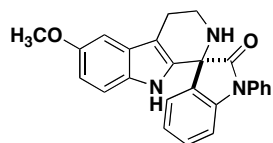

**(S)-1-phenyl-6'-methoxy-2',3',4',9'-tetrahydrospiro[indoline-3,1'-pyrido[3,4-*b*]indol]-2-one (**4ia**)**. The compound was prepared using both Method A and B, yielding a white solid; Method A (99%), Method B (44%). Enantiomeric ratio was determined by HPLC with a Daicel CHIRALPAK® AD-H column (20% IPA/hexanes), 0.8 mL/min.  $t_R$  (major) = 19.7 min,  $t_R$  (minor) = 81.7 min. Method A 85:15 er. Method B 97:3 er,  $[\alpha]_D^{24}$  21.8° ( $c$  = 0.53, CHCl<sub>3</sub>). IR (neat, selected peaks):  $\nu_{max}$  3297, 2177, 1702, 1605, 1456, 1203, 1113 cm<sup>-1</sup>. <sup>1</sup>H NMR (400 MHz, CDCl<sub>3</sub>)  $\delta$  7.58 – 7.45 (m, 4H), 7.45 – 7.39 (m, 1H), 7.32 – 7.27 (m, 3H), 7.12 – 7.05 (m, 2H), 7.03 (d,  $J$  = 2.4, 1H), 6.95 (d,  $J$  = 7.9, 1H), 6.81 (dd,  $J$  = 8.8, 2.5, 1H), 3.93 (dt,  $J$  = 12.7, 6.2, 1H), 3.87 (s, 3H), 3.38 (dt,  $J$  = 13.1, 5.2, 1H), 2.99 – 2.94 (m, 1H), 1.61 (bs, 1H). <sup>13</sup>C NMR (100 MHz, CDCl<sub>3</sub>)  $\delta$  176.1, 154.4, 143.6, 134.3, 131.6, 131.4, 131.2, 129.9, 129.9, 128.4, 127.9, 126.6, 125.3, 124.0, 112.7, 112.0, 110.2, 100.9, 61.8, 56.2, 40.2, 22.4. Exact mass calculated for C<sub>25</sub>H<sub>22</sub>N<sub>3</sub>O<sub>2</sub> [M + H]<sup>+</sup>, 396.1712, Found 396.1707.

## Racemic standard (**4ia**)

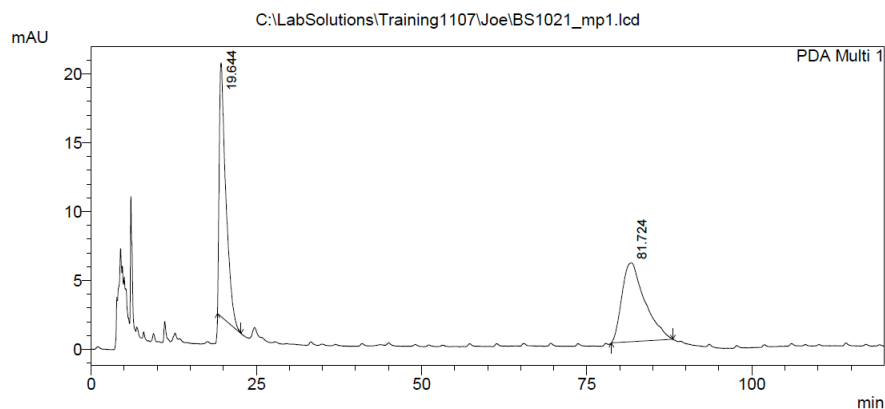

1 PDA Multi 1/254nm 4nm

< Peak Table >

PeakTable C:\LabSolutions\Training1107\Joe\BS1021\_mp1.lcd

| PDA Ch1 254nm 4nm |           |         |        |         |          |
|-------------------|-----------|---------|--------|---------|----------|
| Peak#             | Ret. Time | Area    | Height | Area %  | Height % |
| 1                 | 19.644    | 1288924 | 18444  | 48.211  | 76.314   |
| 2                 | 81.724    | 1384565 | 5724   | 51.789  | 23.686   |
| Total             |           | 2673490 | 24168  | 100.000 | 100.000  |

## Enantiomerically enriched (**4ia**) (Method A, 97:3 er)

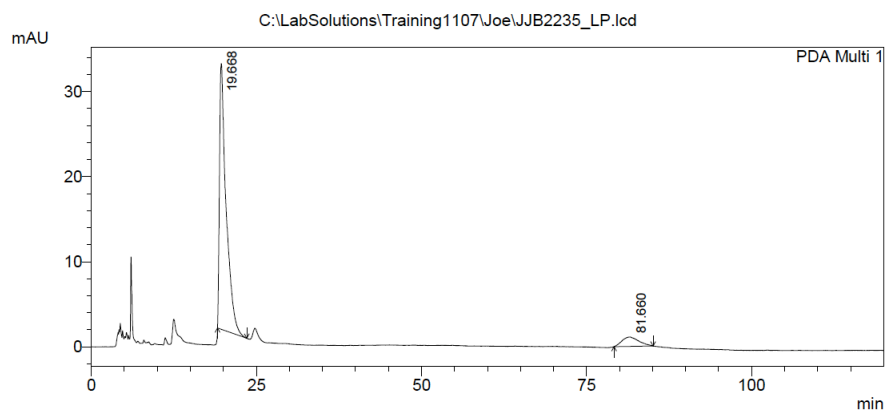

1 PDA Multi 1/254nm 4nm

< Peak Table >

PeakTable C:\LabSolutions\Training1107\Joe\JJB2235\_LP.lcd

| PDA Ch1 254nm 4nm |           |         |        |         |          |
|-------------------|-----------|---------|--------|---------|----------|
| Peak#             | Ret. Time | Area    | Height | Area %  | Height % |
| 1                 | 19.668    | 2186310 | 31226  | 91.907  | 96.595   |
| 2                 | 81.660    | 192526  | 1101   | 8.093   | 3.405    |
| Total             |           | 2378835 | 32327  | 100.000 | 100.000  |

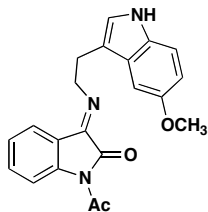

**(*E*)-1-acetyl-3-(2-(5-methoxy-1*H*-indol-3-yl)ethylimino)indolin-2-one (4j):**

The compound was prepared using both Method A (87%) and Method B (53%). IR (neat, selected peaks):  $\nu_{max}$  3402, 2925, 2852, 1701, 1645, 1512, 1222  $\text{cm}^{-1}$ .  $^1\text{H}$  NMR (400 MHz,  $\text{CDCl}_3$ )  $\delta$  10.92 (s, 1H), 8.66 (d,  $J = 8.5$ , 1H), 8.32 (d,  $J = 8.0$ , 1H), 7.99 (s, 1H), 7.60 (t,  $J = 7.9$ , 1H), 7.28 (d,  $J = 8.8$ , 1H), 7.15 – 7.03 (m, 3H), 6.89 (dd,  $J = 8.8, 2.3$ , 1H), 6.86 (s, 1H), 3.86 (s, 3H), 3.76 (q,  $J = 6.5$ , 2H), 3.07 (t,  $J = 6.6$ , 2H), 2.21 (s, 3H). Exact mass calculated  $\text{C}_{21}\text{H}_{20}\text{N}_3\text{O}_3$   $[\text{M} + \text{H}_2\text{O} + \text{H}]^+$ , 380.1605, LRMS Found 380.0.

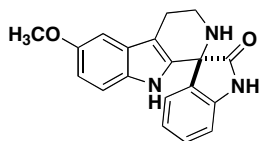

**(*S*)-6'-methoxy-1-H-2',3',4',9'-tetrahydrospiro[indoline-3,1'-pyrido[3,4-*b*]indol]-2-one**

**(4ka)** white solid Method A (66%), Method A (99%). Spectra matches known compound.<sup>27</sup> Enantiomeric excess was determined by HPLC with a Daicel CHIRALPAK® AD-H column (20% IPA/hexanes), 0.8 mL/min. tR (major) = 21.6 min, tR (minor) = 14.2 min. Method A 94:6 er. Method B 94:6 er,  $[\alpha]_D^{24}$   $-4.51^\circ$  ( $c = 0.24$ ,  $\text{CHCl}_3$ ).

**Racemic standard (4ka)**

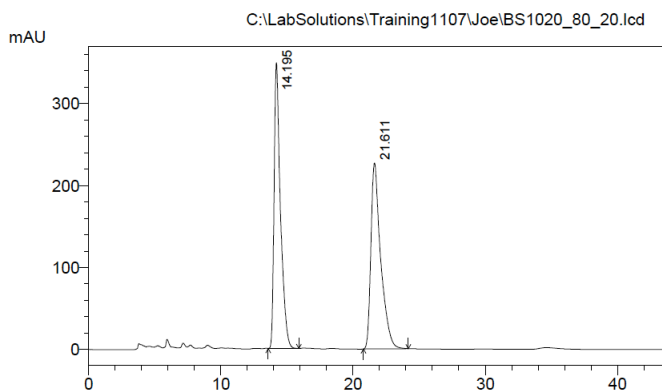

1 PDA Multi 1/254nm 4nm

**< Peak Table >**

PeakTable C:\LabSolutions\Training1107\Joel\BS1020\_80\_20.lcd

PDA Ch1 254nm 4nm

| Peak# | Ret. Time | Area     | Height | Area %  | Height % |
|-------|-----------|----------|--------|---------|----------|
| 1     | 14.195    | 11623045 | 348685 | 49.938  | 60.600   |
| 2     | 21.611    | 11651754 | 226699 | 50.062  | 39.400   |
| Total |           | 23274800 | 575384 | 100.000 | 100.000  |

## Enantiomerically enriched (**4ka**) (Method B 94:6 er)

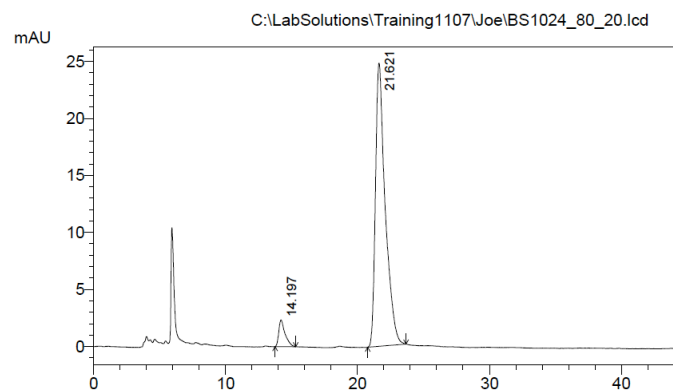

### < Peak Table >

PeakTable C:\LabSolutions\Training1107\Joe\BS1024\_80\_20.lcd

| Peak# | Ret. Time | Area    | Height | Area %  | Height % |
|-------|-----------|---------|--------|---------|----------|
| 1     | 14.197    | 76817   | 2327   | 5.668   | 8.568    |
| 2     | 21.621    | 1278492 | 24836  | 94.332  | 91.432   |
| Total |           | 1355309 | 27163  | 100.000 | 100.000  |

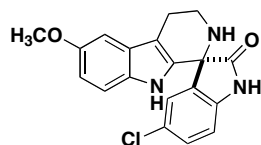

**(*S*)-5-chloro-6'-methoxy-1-H-2',3',4',9'-tetrahydrospiro[indoline-3,1'-pyrido[3,4-*b*]indol]-2-one (**4la**):** The compound was prepared using both Method A and B, yielding a white foamy solid; Method A (99%), Method B (88%). Enantiomeric excess was determined by HPLC with a Daicel CHIRALPAK® AD-H column (10% IPA/hexanes), 0.8 mL/min.  $t_R$  (major) = 14.0 min,  $t_R$  (minor) = 17.2 min. Method A 84:16 er,  $[\alpha]_D^{24}$  -32.5° ( $c$  = 0.28, CHCl<sub>3</sub>). Method B 80:20 er. IR (neat, selected peaks):  $\nu_{max}$  3375, 3219, 2922, 1714, 1459, 1174, 823 cm<sup>-1</sup>. <sup>1</sup>H NMR (400 MHz, CDCl<sub>3</sub>)  $\delta$  9.03 (s, 1H), 8.09 (s, 1H), 7.10 (d,  $J$  = 2.0, 1H), 6.96 (d,  $J$  = 2.3, 2H), 6.81 (d,  $J$  = 8.7, 1H), 6.71 (dd,  $J$  = 8.7, 2.2, 1H), 6.44 (d,  $J$  = 8.1, 1H), 3.84 (s, 3H), 3.58 – 3.51 (m, 1H), 3.27 – 3.19 (m, 1H), 2.91 – 2.78 (m, 3H), 1.93 (bs, 1H). <sup>13</sup>C NMR (100 MHz, CDCl<sub>3</sub>)  $\delta$  176.3, 154.5, 142.7, 133.7, 132.9, 131.5, 130.2, 128.2, 127.7, 116.3, 112.9, 112.0, 110.4, 100.9, 61.8, 56.2, 40.3, 26.9, 22.3. Exact mass calculated for C<sub>19</sub>H<sub>17</sub>ClN<sub>3</sub>O<sub>2</sub> [M + H]<sup>+</sup>, 354.1009, Found 354.1005.

## Racemic standard **4la**

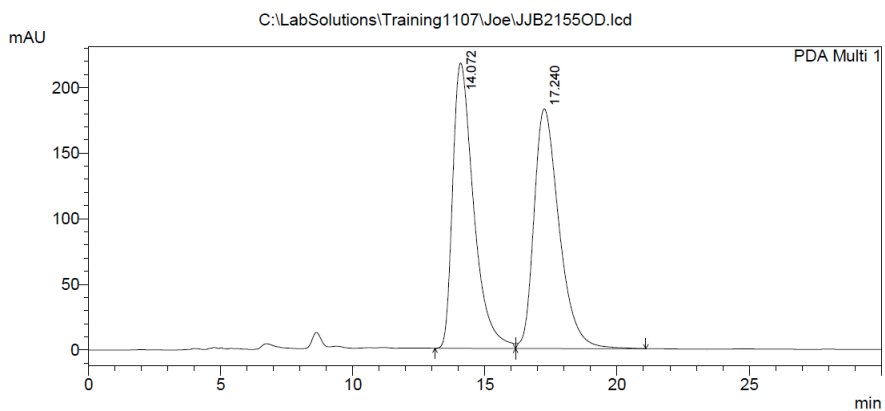

### < Peak Table >

PeakTable C:\LabSolutions\Training1107\Joe\JJB2155OD.lcd

| Peak# | Ret. Time | Area     | Height | Area %  | Height % |
|-------|-----------|----------|--------|---------|----------|
| 1     | 14.072    | 11993912 | 217499 | 49.817  | 54.351   |
| 2     | 17.240    | 12081928 | 182676 | 50.183  | 45.649   |
| Total |           | 24075839 | 400175 | 100.000 | 100.000  |

## Enantiomerically enriched (**4la**) (Method A, 84:16 er)

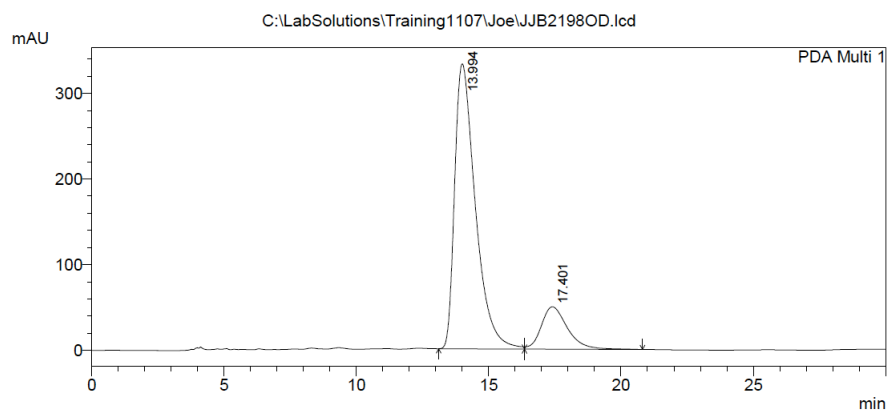

### < Peak Table >

PeakTable C:\LabSolutions\Training1107\Joe\JJB2198OD.lcd

| Peak# | Ret. Time | Area     | Height | Area %  | Height % |
|-------|-----------|----------|--------|---------|----------|
| 1     | 13.994    | 18124272 | 332894 | 84.171  | 87.063   |
| 2     | 17.401    | 3408447  | 49468  | 15.829  | 12.937   |
| Total |           | 21532719 | 382361 | 100.000 | 100.000  |

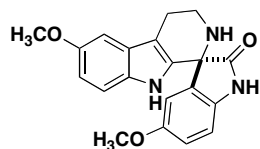

**(S)-5-methoxy-6'-methoxy-1-H-2',3',4',9'-tetrahydrospiro[indoline-3,1'-pyrido[3,4-*b*]indol]-2-one (4ma):** off white foam Method A (84%), Method B (92%). Enantiomeric excess was determined by HPLC with a Daicel CHIRALPAK® OD-H column (20% IPA/hexanes), 0.8 mL/min.  $t_R$  (major) = 18.0 min,  $t_R$  (minor) = 22.3 min. Method A 93:7 er. Method B 96:4 er,  $[\alpha]_D^{24}$  -29.8° ( $c$  = 0.21,  $\text{CHCl}_3$ ). IR (neat, selected peaks):  $\nu_{\max}$  3181, 2944, 2327, 1688, 1548, 1474, 1218, 781  $\text{cm}^{-1}$ .  $^1\text{H}$  NMR (400 MHz,  $\text{CDCl}_3$ )  $\delta$  7.74 (s, 1H), 7.33 (s, 1H), 7.06 (d,  $J$  = 8.8, 1H), 7.01 (d,  $J$  = 2.3, 1H), 6.81 (d,  $J$  = 2.5, 2H), 6.79 (d,  $J$  = 2.5, 1H), 6.77 (s, 1H), 3.86 (s, 4H), 3.70 (s, 3H), 3.33 (m, 1H), 2.94 (m, 2H).  $^{13}\text{C}$  NMR (75 MHz,  $\text{CD}_2\text{Cl}_2$ ,  $\text{CD}_3\text{OD}$ , 1:1)  $\delta$  179.0, 156.4, 153.9, 134.5, 133.3, 131.5, 130.8, 127.4, 114.9, 112.2, 111.9, 111.4, 111.2, 100.5, 62.3, 55.9, 55.9, 40.0, 22.0. Exact mass calculated for  $\text{C}_{20}\text{H}_{20}\text{N}_3\text{O}_3$   $[\text{M} + \text{H}]^+$ , 350.1505, Found 350.1499.

#### Racemic standard (4ma)

107\JoelBS1029OD.lcd

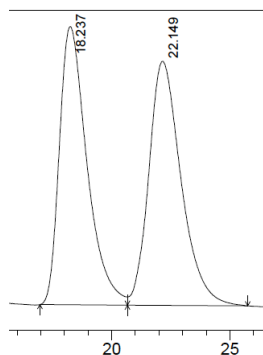

1 PDA Multi 1/254nm 4nm

#### < Peak Table >

PeakTable C:\LabSolutions\Training1107\JoelBS1029OD.lcd

PDA Ch1 254nm 4nm

| Peak# | Ret. Time | Area    | Height | Area %  | Height % |
|-------|-----------|---------|--------|---------|----------|
| 1     | 18.237    | 3191413 | 39221  | 49.371  | 53.261   |
| 2     | 22.149    | 3272674 | 34418  | 50.629  | 46.739   |
| Total |           | 6464087 | 73639  | 100.000 | 100.000  |

Enantiomerically enriched (**4ma**) (Method A, 97:3 er)

S1027OD.lcd

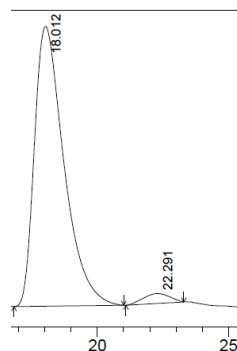

1 PDA Multi 1/254nm 4nm

< Peak Table >

PeakTable C:\LabSolutions\Training1107\Joe\BS1027OD.lcd

PDA Ch1 254nm 4nm

| Peak# | Ret. Time | Area    | Height | Area %  | Height % |
|-------|-----------|---------|--------|---------|----------|
| 1     | 18.012    | 6453490 | 82267  | 96.925  | 96.597   |
| 2     | 22.291    | 204769  | 2898   | 3.075   | 3.403    |
| Total |           | 6658259 | 85166  | 100.000 | 100.000  |

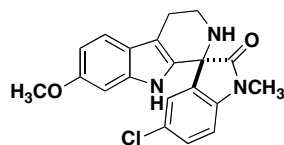

**(S)-5-chloro-1-methyl-7'-methoxy-2',3',4',9'-tetrahydrospiro[indoline-3,1'-pyrido[3,4-**

**b]indol]-2-one (4bb):** The compound was prepared using both Method A and B, yielding an off white foam; Method A (93%), Method B (89%). Enantiomeric excess was determined by HPLC with a Daicel CHIRALPAK® AD-H column (20% IPA/hexanes), 0.8 mL/min.  $t_R$  (major) = 15.0 min,  $t_R$  (minor) = 24.6 min. Method A 60:40 er. Method B 80:20 er,  $[\alpha]_D^{24}$  -76.5° ( $c$  = 0.17,  $\text{CHCl}_3$ ). IR (neat, selected peaks):  $\nu_{\text{max}}$  3400, 3197, 2928, 1698, 1608, 1458, 1114  $\text{cm}^{-1}$ .  $^1\text{H}$  NMR (400 MHz,  $\text{CDCl}_3$ )  $\delta$  7.42 (d,  $J$  = 8.6, 1H), 7.39 (s, 1H), 7.31 (dd,  $J$  = 8.3, 2.1, 1H), 7.18 (d,  $J$  = 2.1, 1H), 6.81 (d,  $J$  = 8.3, 1H), 6.77 (dd,  $J$  = 8.6, 2.3, 1H), 6.64 (d,  $J$  = 2.1, 1H), 3.80 – 3.71 (m, 4H), 3.28 (dt,  $J$  = 13.3, 5.5, 1H), 3.20 (s, 3H), 2.91 (t,  $J$  = 5.7, 2H), 1.90 (s, 1H).  $^{13}\text{C}$  NMR (100 MHz,  $\text{CDCl}_3$ )  $\delta$  176.6, 157.1, 142.2, 137.3, 133.4, 129.9, 129.0, 128.1, 125.4, 121.7, 119.4, 112.9, 109.9, 109.5, 95.1, 61.8, 55.9, 40.3, 26.9, 22.3. Exact mass calculated for  $\text{C}_{20}\text{H}_{19}\text{ClN}_3\text{O}_2$   $[\text{M} + \text{H}]^+$ , 368.1166, LRMS Found 368.0.

## Racemic Standard (**4bb**)

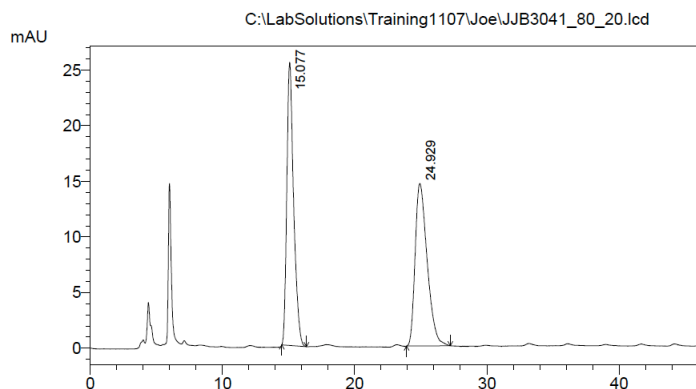

1 PDA Multi 1/254nm 4nm

< Peak Table >

PeakTable C:\LabSolutions\Training1107\Joe\JJB3041\_80\_20.lcd

| Peak# | Ret. Time | Area    | Height | Area %  | Height % |
|-------|-----------|---------|--------|---------|----------|
| 1     | 15.077    | 912201  | 25449  | 49.705  | 63.538   |
| 2     | 24.929    | 923027  | 14605  | 50.295  | 36.462   |
| Total |           | 1835227 | 40054  | 100.000 | 100.000  |

## Enantiomerically enriched (**4bb**) (Method B, 80:20 er)

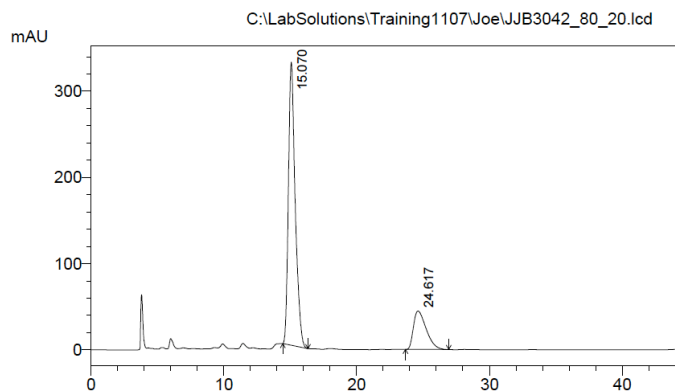

1 PDA Multi 1/254nm 4nm

< Peak Table >

PeakTable C:\LabSolutions\Training1107\Joe\JJB3042\_80\_20.lcd

| Peak# | Ret. Time | Area     | Height | Area %  | Height % |
|-------|-----------|----------|--------|---------|----------|
| 1     | 15.070    | 11674366 | 328288 | 79.706  | 88.044   |
| 2     | 24.617    | 2972471  | 44582  | 20.294  | 11.956   |
| Total |           | 14646837 | 372870 | 100.000 | 100.000  |

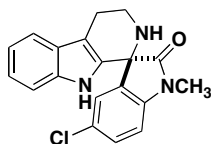

**(S)-5-chloro-1-methyl-2',3',4',9'-tetrahydrospiro[indoline-3,1'-pyrido[3,4-*b*]indol]-2-one**

**(3bc):** The compound was prepared using both Method A and B, yielding a off-white foamy solid; Method A (93%). Method B (89%). Enantiomeric excess was determined by HPLC with a Daicel CHIRALPAK® AD-H column (30% IPA/hexanes), 0.8 mL/min.  $t_R$  (major) = 8.5 min,  $t_R$  (minor) = 10.9 min. Method A 67:33 er. Method B 65:35 er. IR (neat, selected peaks):  $\nu_{max}$  3266, 2926, 1697, 1610, 1100, 742  $\text{cm}^{-1}$ .  $^1\text{H}$  NMR (400 MHz,  $\text{CDCl}_3$ )  $\delta$  7.57 (d,  $J$  = 7.2, 1H), 7.34 (dd,  $J$  = 8.3, 2.1, 2H), 7.21 – 7.08 (m, 5H), 6.86 (d,  $J$  = 8.3, 1H), 3.82 (dt,  $J$  = 13.2, 5.9, 1H), 3.32 (dt,  $J$  = 13.3, 5.5, 1H), 3.25 (s, 3H), 2.96 (t,  $J$  = 5.7, 2H), 1.79 (s, 2H).  $^{13}\text{C}$  NMR (100 MHz,  $\text{CDCl}_3$ )  $\delta$  176.4, 142.2, 136.4, 133.3, 129.9, 129.4, 129.0, 127.3, 125.5, 123.0, 120.0, 118.9, 113.1, 111.2, 109.9, 61.8, 40.3, 26.9, 22.3. Exact mass calculated for  $\text{C}_{19}\text{H}_{17}\text{ClN}_3\text{O}$   $[\text{M} + \text{H}]^+$ , 338.1060, Found 338.1054.

Enantiomerically enriched (**3bc**) (67:33 er)

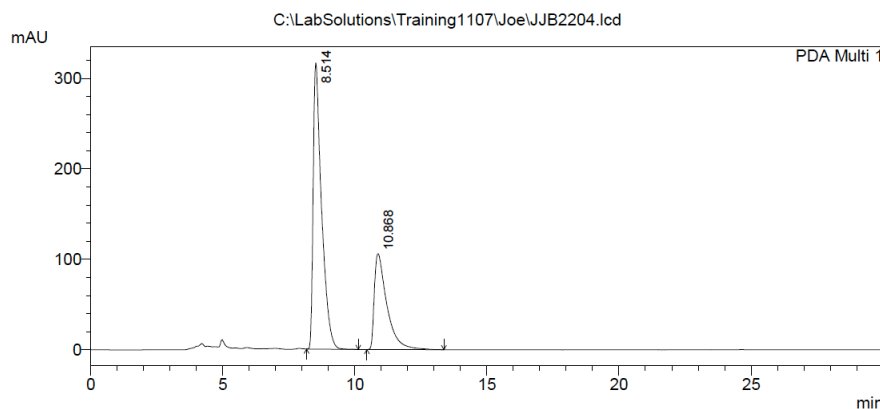

**< Peak Table >**

PeakTable C:\LabSolutions\Training1107\Joe\JJB2204.lcd

| Peak# | Ret. Time | Area     | Height | Area %  | Height % |
|-------|-----------|----------|--------|---------|----------|
| 1     | 8.514     | 6959061  | 316299 | 66.632  | 74.921   |
| 2     | 10.868    | 3484919  | 105877 | 33.368  | 25.079   |
| Total |           | 10443980 | 422176 | 100.000 | 100.000  |

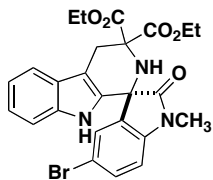

**(S)-diethyl 5-bromo-1-methyl-2-oxo-4',9'-dihydrospiro[indoline-3,1'-pyrido[3,4-*b*]indole]-3',3'-(2'*H*)-dicarboxylate (4ad):** Method A using catalyst (*S*)-**8e** (92%). Method B with catalyst (*S*)-**8d** (21%). Enantiomeric excess was determined by HPLC with a Daicel CHIRALPAK® AD-H column (30% IPA/hexanes), 0.8 mL/min.  $t_R$  (major) = 10.9 min,  $t_R$  (minor) = 6.4 min. Method A 59:40 er. Method B 52:48 er. IR (neat, selected peaks):  $\nu_{max}$  3394, 3318, 2930, 1709, 1606, 1453, 1247  $\text{cm}^{-1}$ .  $^1\text{H}$  NMR (400 MHz,  $\text{CDCl}_3$ )  $\delta$  7.60 (d,  $J$  = 6.6, 1H), 7.50 (dd,  $J$  = 8.3, 2.0, 1H), 7.38 (d,  $J$  = 1.9, 1H), 7.25 (s, 1H), 7.19 – 7.09 (m, 3H), 6.80 (d,  $J$  = 8.3, 1H), 4.33 – 4.16 (m, 4H), 3.68 (d,  $J$  = 15.4, 1H), 3.50 (d,  $J$  = 15.4, 1H), 3.32 (s, 1H), 3.20 (d,  $J$  = 4.6, 3H), 1.30 – 1.19 (m, 7H).  $^{13}\text{C}$  NMR (100 MHz,  $\text{CDCl}_3$ )  $\delta$  175.8, 171.1, 169.5, 143.1, 136.8, 133.3, 132.7, 129.2, 128.5, 126.9, 123.1, 120.2, 119.0, 116.3, 111.3, 110.4, 110.3, 65.2, 62.5, 62.3, 61.7, 27.0, 26.9, 14.2. Exact mass calculated for  $\text{C}_{25}\text{H}_{25}\text{BrN}_3\text{O}_5$   $[\text{M} + \text{H}]^+$ , 526.0972, Found 528.0968.

Enantiomerically enriched (**4ad**) (59:41 er)

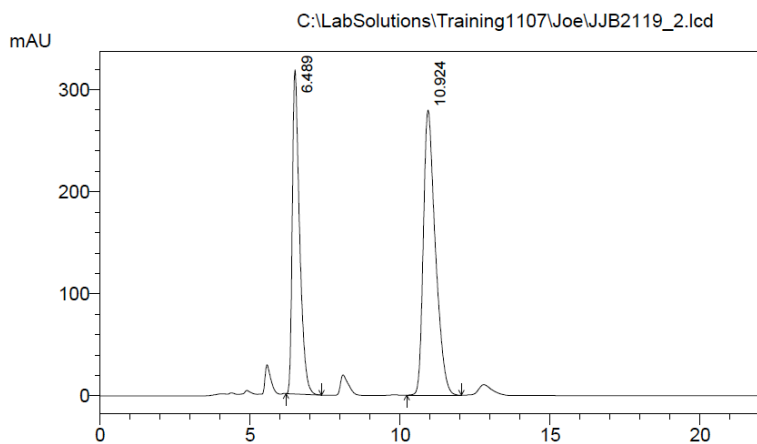

1 PDA Multi 1/254nm 4nm

< Peak Table >

PeakTable C:\LabSolutions\Training1107\Joe\JJB2119\_2.lcd

PDA Ch1 254nm 4nm

| Peak# | Ret. Time | Area     | Height | Area %  | Height % |
|-------|-----------|----------|--------|---------|----------|
| 1     | 6.489     | 5341806  | 317531 | 40.683  | 53.204   |
| 2     | 10.924    | 7788512  | 279288 | 59.317  | 46.796   |
| Total |           | 13130319 | 596820 | 100.000 | 100.000  |

### X-ray Structure Analysis of Spiroindolone 4aa (JF2008)

A colorless plate with approximate orthogonal dimensions 0.25 x 0.07 x 0.05 mm<sup>3</sup> was placed and optically centered on the Bruker APEX DUO<sup>1</sup> CCD system at -183°C (90K). Indexing of the unit cell was attempted using a random set of reflections collected from three series of 0.5° wide  $\omega$ -scans, 10 seconds per frame, and 30 frames per series that were well distributed in reciprocal space. Data

were collected [CuK $\alpha$ ] with 0.5° wide scans at varying  $\phi$  and omega angles for 20, 30 or 40 seconds per frame dependent upon detector 2theta angle such that nearly all unique reflections were collected at least once; overall 96.5% were collected. The crystal to detector distance was 4.96 cm, thus providing a nearly complete sphere of data to  $\theta_{\text{max}} = 72.03^\circ$ .

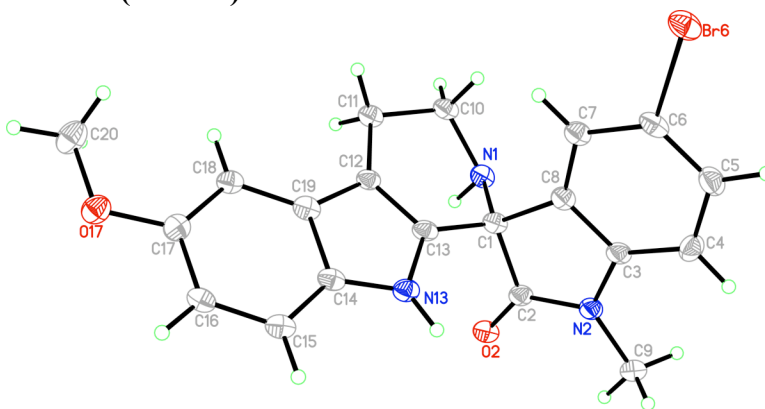

### Structural determination and Refinement:

All crystallographic calculations were performed on a Personal computer (PC) with a Pentium 3.20GHz processor and 4GB of extended memory. Data collected were corrected for Lorentz and polarization effects and absorption using Blessing's method and merged as incorporated into the program Twinabs<sup>2,6</sup>. The SHELXTL<sup>3</sup> program package was now implemented to determine, based upon intensity statistics and systematic absences, the non-centrosymmetric monoclinic space group P2<sub>1</sub> (no.4). The structure was determined by direct methods with a majority of the non-hydrogen atoms being located directly using the program XS<sup>4</sup>. Refinement of the structure was achieved using the program XL<sup>4</sup>. Difference-Fourier refinement cycles were required to locate the remaining non-hydrogen atoms. Refinement converged to approximately  $R_F = 7\%$  for those data observed. It was evident from the outset that the structure possessed more than a single domain when examining the individual frames so reflections were thresholded in APEX<sup>1</sup> and these reflections were input into Cellnow<sup>5</sup> that determined the twin relationship between the two components and generated the orientation matrices for the components and output a useable multiple matrix input file for the integration program SAINT<sup>1</sup>. Saint was run six times using the output optimized merged matrix file from the previous run. Data collected were now corrected for absorption using TWINABS<sup>2,6</sup> and Blessing's method and merged generating both HKLF4 and HKLF5 files. Convergence of the structure proceeded quickly using both the HKLF5 and HKLF4 files. All of the non-hydrogen atoms were refined anisotropically with the two domains being present as follows: major component 81.6% and minor 18.4%. Since the HKLF5 format file yielded the best results, it was chosen for structure completion. The structure also contains a ethylacetate molecule at 50% occupancy as it overlays itself throughout the lattice. All of the hydrogen atoms were placed in calculated positions throughout the final convergence cycles but their thermal parameters were allowed to refine freely. The final structure was refined to convergence with  $R(F) = 5.85\%$ ,  $wR(F^2) = 15.33\%$ ,  $GOF = 1.102$  for all 3664 reflections [ $R(F) = 5.81\%$ ,  $wR(F^2) = 15.27\%$  for those 3608 data with  $F_o > 4\sigma(F_o)$ ]. A final difference-Fourier map was featureless but for the two largest peaks being within 1Å of the Bromine atom indicating that the structure is therefore both correct and complete.

**Table 1.** Crystal data and structure refinement for spiroindolone **4aa** (JF2008).

|                                   |                                        |                             |
|-----------------------------------|----------------------------------------|-----------------------------|
| Identification code               | tw51 (2-Comp Twin)                     |                             |
| Empirical formula                 | C22 H22 Br N3 O3                       |                             |
| Formula weight                    | 456.34                                 |                             |
| Temperature                       | 90(2) K                                |                             |
| Wavelength                        | 1.54178 Å                              |                             |
| Crystal system                    | Monoclinic                             |                             |
| Space group                       | P 2 <sub>1</sub>                       |                             |
| Unit cell dimensions              | a = 11.3749(10) Å                      | $\alpha = 90^\circ$ .       |
|                                   | b = 6.6273(6) Å                        | $\beta = 93.086(5)^\circ$ . |
|                                   | c = 13.6225(12) Å                      | $\gamma = 90^\circ$ .       |
| Volume                            | 1025.44(16) Å <sup>3</sup>             |                             |
| Z                                 | 2                                      |                             |
| Density (calculated)              | 1.478 Mg/m <sup>3</sup>                |                             |
| Absorption coefficient            | 2.969 mm <sup>-1</sup>                 |                             |
| F(000)                            | 468                                    |                             |
| Crystal size                      | 0.25 x 0.07 x 0.05 mm <sup>3</sup>     |                             |
| Crystal color and habit           | Colorless Plate                        |                             |
| Diffractionmeter                  | Bruker APEX-II Duo CCD                 |                             |
| Theta range for data collection   | 3.25 to 72.03°.                        |                             |
| Index ranges                      | -14 ≤ h ≤ 14, -7 ≤ k ≤ 8, -16 ≤ l ≤ 16 |                             |
| Reflections collected             | 3664                                   |                             |
| Independent reflections           | 3664 [R(int) = 0.0000]                 |                             |
| Observed reflections (I > 2σ(I))  | 3608                                   |                             |
| Completeness to theta = 72.03°    | 96.5 %                                 |                             |
| Absorption correction             | Semi-empirical from equivalents        |                             |
| Max. and min. transmission        | 0.8682 and 0.5287                      |                             |
| Solution method                   | SHELXS-97 (Sheldrick, 2008)            |                             |
| Refinement method                 | SHELXL-97 (Sheldrick, 2008)            |                             |
| Data / restraints / parameters    | 3664 / 12 / 310                        |                             |
| Goodness-of-fit on F <sup>2</sup> | 1.102                                  |                             |
| Final R indices [I > 2σ(I)]       | R1 = 0.0581, wR2 = 0.1527              |                             |
| R indices (all data)              | R1 = 0.0585, wR2 = 0.1533              |                             |
| Absolute structure parameter      | 0.00(3)                                |                             |
| Largest diff. peak and hole       | 1.788 and -0.482 e.Å <sup>-3</sup>     |                             |

A colorless plate with approximate orthogonal dimensions 0.05 x 0.14 x 0.48 mm<sup>3</sup> was placed and optically centered on the Bruker APEX II Duo<sup>1</sup> CCD system at 90(2)K. The initial unit cell was indexed using a least-squares analysis of a random set of reflections collected from three series of 0.5° wide  $\omega$ -scans, 10 seconds per frame, and 30 frames per series that were well distributed in reciprocal space. Sixteen Data frame series were collected [CuK $\alpha$ ] with 0.5° wide  $\omega$ -scans, variable scan times dependent upon detector position, and varying  $\phi$ ,  $\omega$ , and  $2\theta$  angles. The crystal to detector distance was 5.02 cm, thus providing a nearly complete sphere of data with processing to  $2\theta_{\max}=136.54^\circ$ .

All crystallographic calculations were performed on an iMac with 2.80GHz quad core processor and 8GB of extended memory. A total of 16563 reflections were collected and corrected for Lorentz and polarization effects in Saint<sup>1</sup> and absorption using Blessing's method as incorporated into the program SADABS<sup>2,3,4</sup> with 3498 unique based upon point group mm2. The SHELXTL<sup>5</sup> program package was implemented to determine the probable space group and set up the initial files. System symmetry, systematic absences, and intensity statistics indicated the non-centrosymmetric orthorhombic space group Pca2<sub>1</sub> (no. 29). The structure was

determined by direct methods using XS<sup>6</sup> with a majority of the non-hydrogen atoms comprising the molecule. The structure was refined with XL<sup>6</sup>. The remaining atoms were located from a subsequent difference-Fourier map. The data collected were merged in least-squares refinement to 3237 unique data [R(int)=0.0314]. All non-hydrogen atoms were refined anisotropically. Hydrogen atoms were initially placed in calculated idealized positions and later their position and thermal parameters were allowed to refine freely (xyzU). The final structure was refined to convergence with R(F)=2.75%, wR(F<sup>2</sup>)=7.37%, GOF=1.037 for all 3237 unique reflections [R(F)=2.74%, wR(F<sup>2</sup>)=7.37% for those 3218 data with Fo > 4σ(Fo)]. The final difference-Fourier map was featureless indicating that the structure is both correct and complete. An empirical correction for extinction was also attempted and found to be less than three sigma and therefore not applied. The absolute structure parameters, Flack(x)<sup>6</sup>, and Hooft<sup>7</sup> were determined to be -0.02(11) and -0.01(3), respectively, clearly indicating that the correct structure has been determined and 35 reflections were missed during data collection.

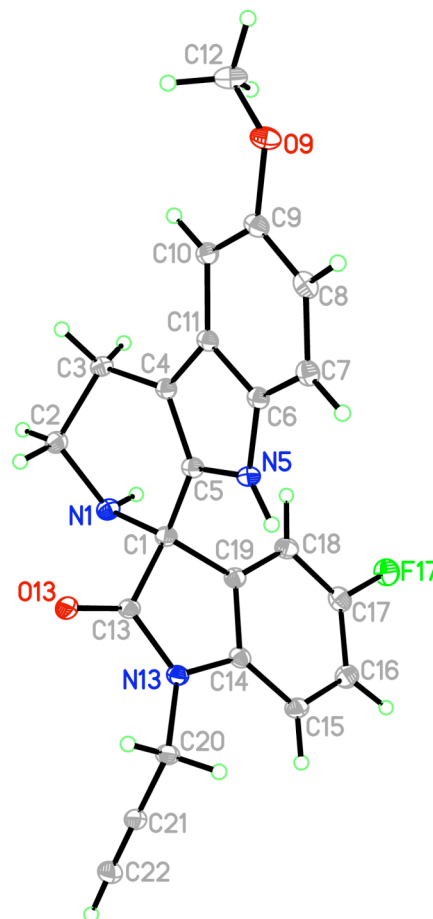

**Table 2.** Crystal data and structure refinement for spiroindolone **4ah** (JF2018).

|                                   |                                                                 |          |
|-----------------------------------|-----------------------------------------------------------------|----------|
| Identification code               | jf2018ff                                                        |          |
| Empirical formula                 | C <sub>22</sub> H <sub>18</sub> F N <sub>3</sub> O <sub>2</sub> |          |
| Formula weight                    | 375.39                                                          |          |
| Temperature                       | 90(2) K                                                         |          |
| Wavelength                        | 1.54178 Å                                                       |          |
| Crystal system                    | Orthorhombic                                                    |          |
| Space group                       | P c a 2 <sub>1</sub>                                            |          |
| Unit cell dimensions              | a = 15.4938(9) Å                                                | α = 90°. |
|                                   | b = 14.6273(8) Å                                                | β = 90°. |
|                                   | c = 8.1904(5) Å                                                 | γ = 90°. |
| Volume                            | 1856.21(19) Å <sup>3</sup>                                      |          |
| Z                                 | 4                                                               |          |
| Density (calculated)              | 1.343 Mg/m <sup>3</sup>                                         |          |
| Absorption coefficient            | 0.779 mm <sup>-1</sup>                                          |          |
| F(000)                            | 784                                                             |          |
| Crystal size                      | 0.48 x 0.14 x 0.05 mm <sup>3</sup>                              |          |
| Crystal color and habit           | Colourless Plate                                                |          |
| Diffractometer                    | Bruker APEX-II Duo CCD                                          |          |
| Theta range for data collection   | 3.02 to 68.35°.                                                 |          |
| Index ranges                      | -16<=h<=17, -17<=k<=17, -9<=l<=9                                |          |
| Reflections collected             | 15936                                                           |          |
| Independent reflections           | 3237 [R(int) = 0.0314]                                          |          |
| Observed reflections (I > 2σ(I))  | 3218                                                            |          |
| Completeness to theta = 68.35°    | 97.3 %                                                          |          |
| Absorption correction             | Empirical, SADABS (multi-scan)                                  |          |
| Max. and min. transmission        | 0.9591 and 0.7062                                               |          |
| Solution method                   | SHELXS-97 (Sheldrick, 2008)                                     |          |
| Refinement method                 | SHELXL-97 (Sheldrick, 2008)                                     |          |
| Data / restraints / parameters    | 3237 / 1 / 325                                                  |          |
| Goodness-of-fit on F <sup>2</sup> | 1.037                                                           |          |
| Final R indices [I>2σ(I)]         | R1 = 0.0274, wR2 = 0.0737                                       |          |
| R indices (all data)              | R1 = 0.0275, wR2 = 0.0737                                       |          |
| Absolute structure parameter      | -0.02(11)                                                       |          |
| Largest diff. peak and hole       | 0.189 and -0.176 e.Å <sup>-3</sup>                              |          |

## References:

1. Bruker (2010) SMART APEX (2010.9-1) and (2009) SAINT (Version 7.68a). Bruker AXS Inc., Madison, Wisconsin, USA.
2. An Empirical Correction for Absorption Anisotropy, Blessing, R. H. (1995). *Acta Cryst.*, A51, 33-38.
3. Sheldrick, G.M., (2002). SHELXTL. Version 6.1. Siemens Analytical X-ray Instruments Inc., Madison, Wisconsin, USA.
4. Sheldrick, G. M., (1997). SHELXS97 and SHELXL97. Universität Göttingen: Göttingen, Germany.
5. Sheldrick, G.M., CELLNOW, Twin matrix determination program, Universität Göttingen: Göttingen, Germany, Version 2008/3.
6. Sheldrick, G.M., TWINABS Version 2008/4 'An Empirical Correction for Absorption Anisotropy applied to Twinned crystals'. Universität Göttingen: Göttingen, Germany, 2003.

400MHz, CDCl<sub>3</sub>

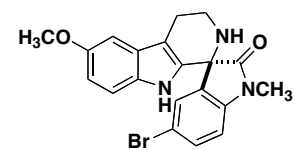

4aa

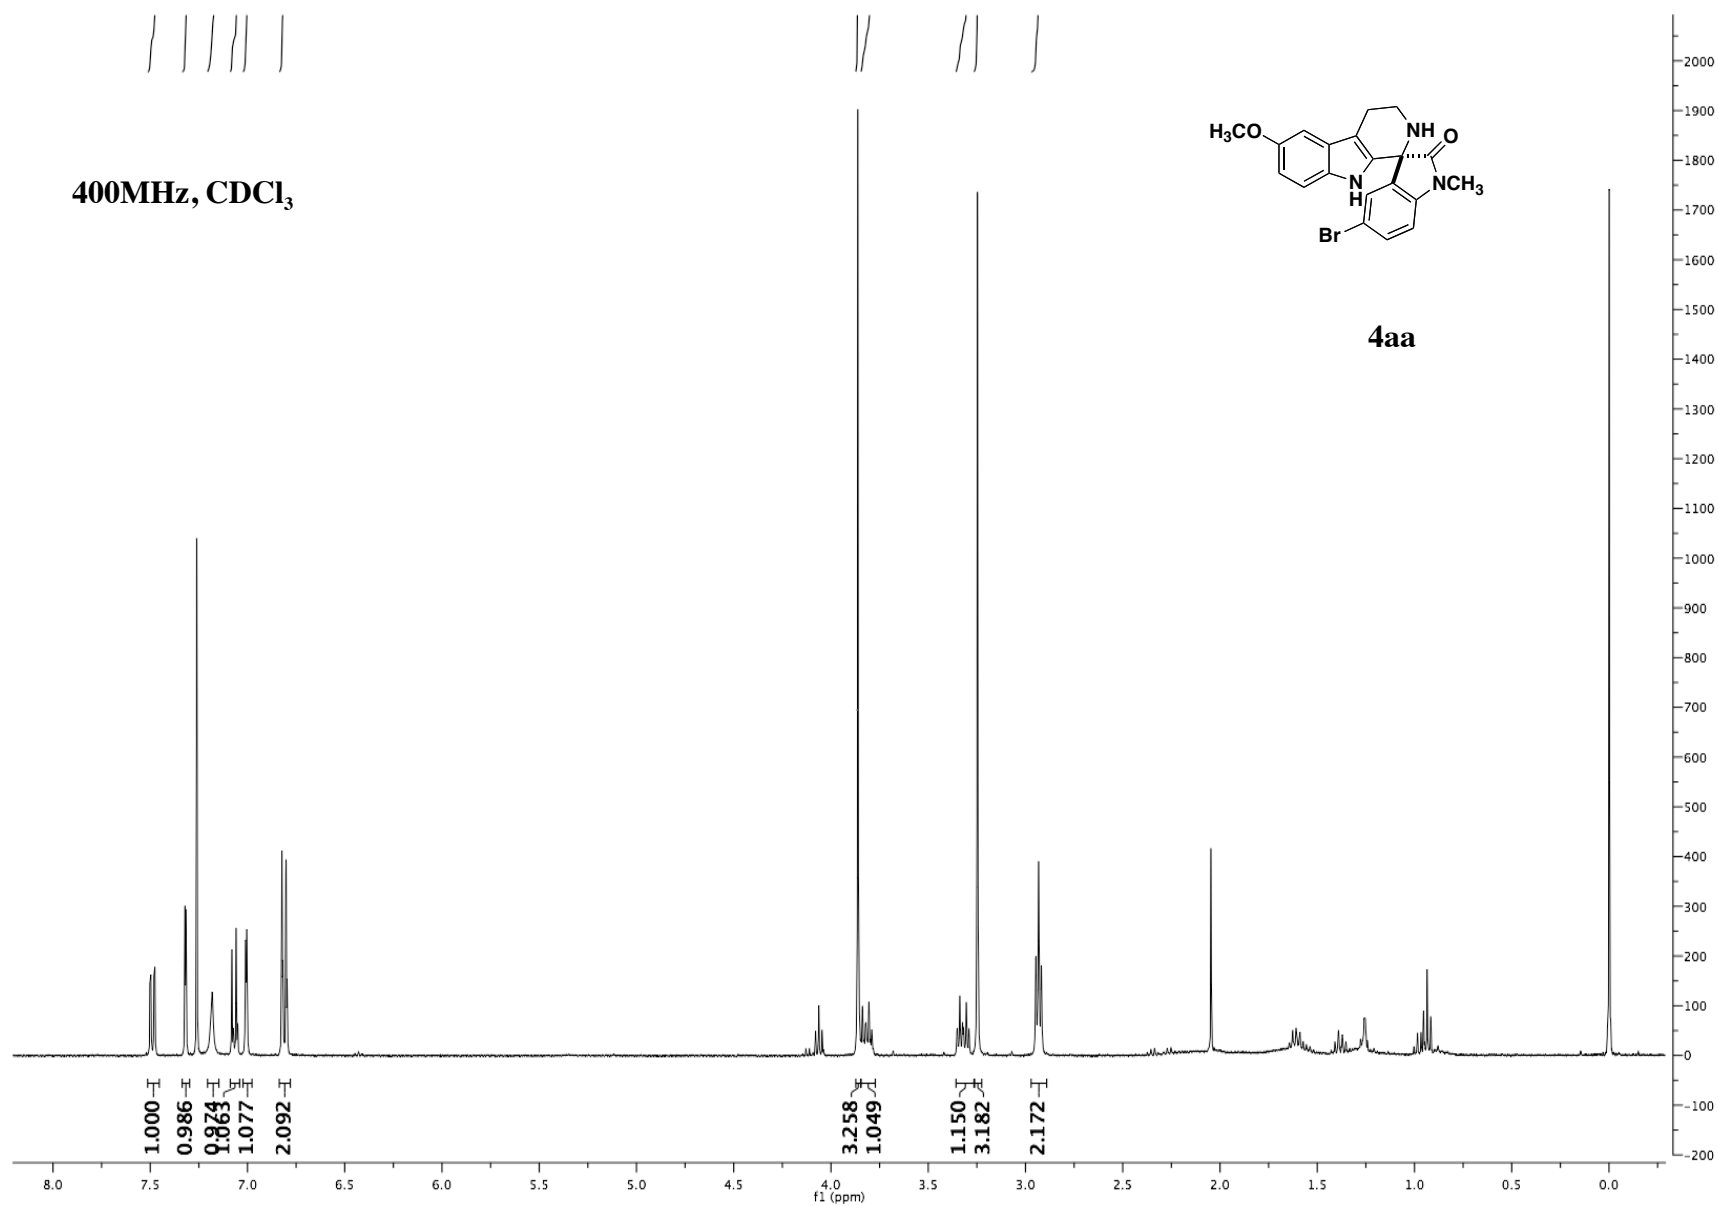

400MHz, CDCl<sub>3</sub>

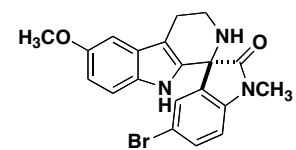

4aa

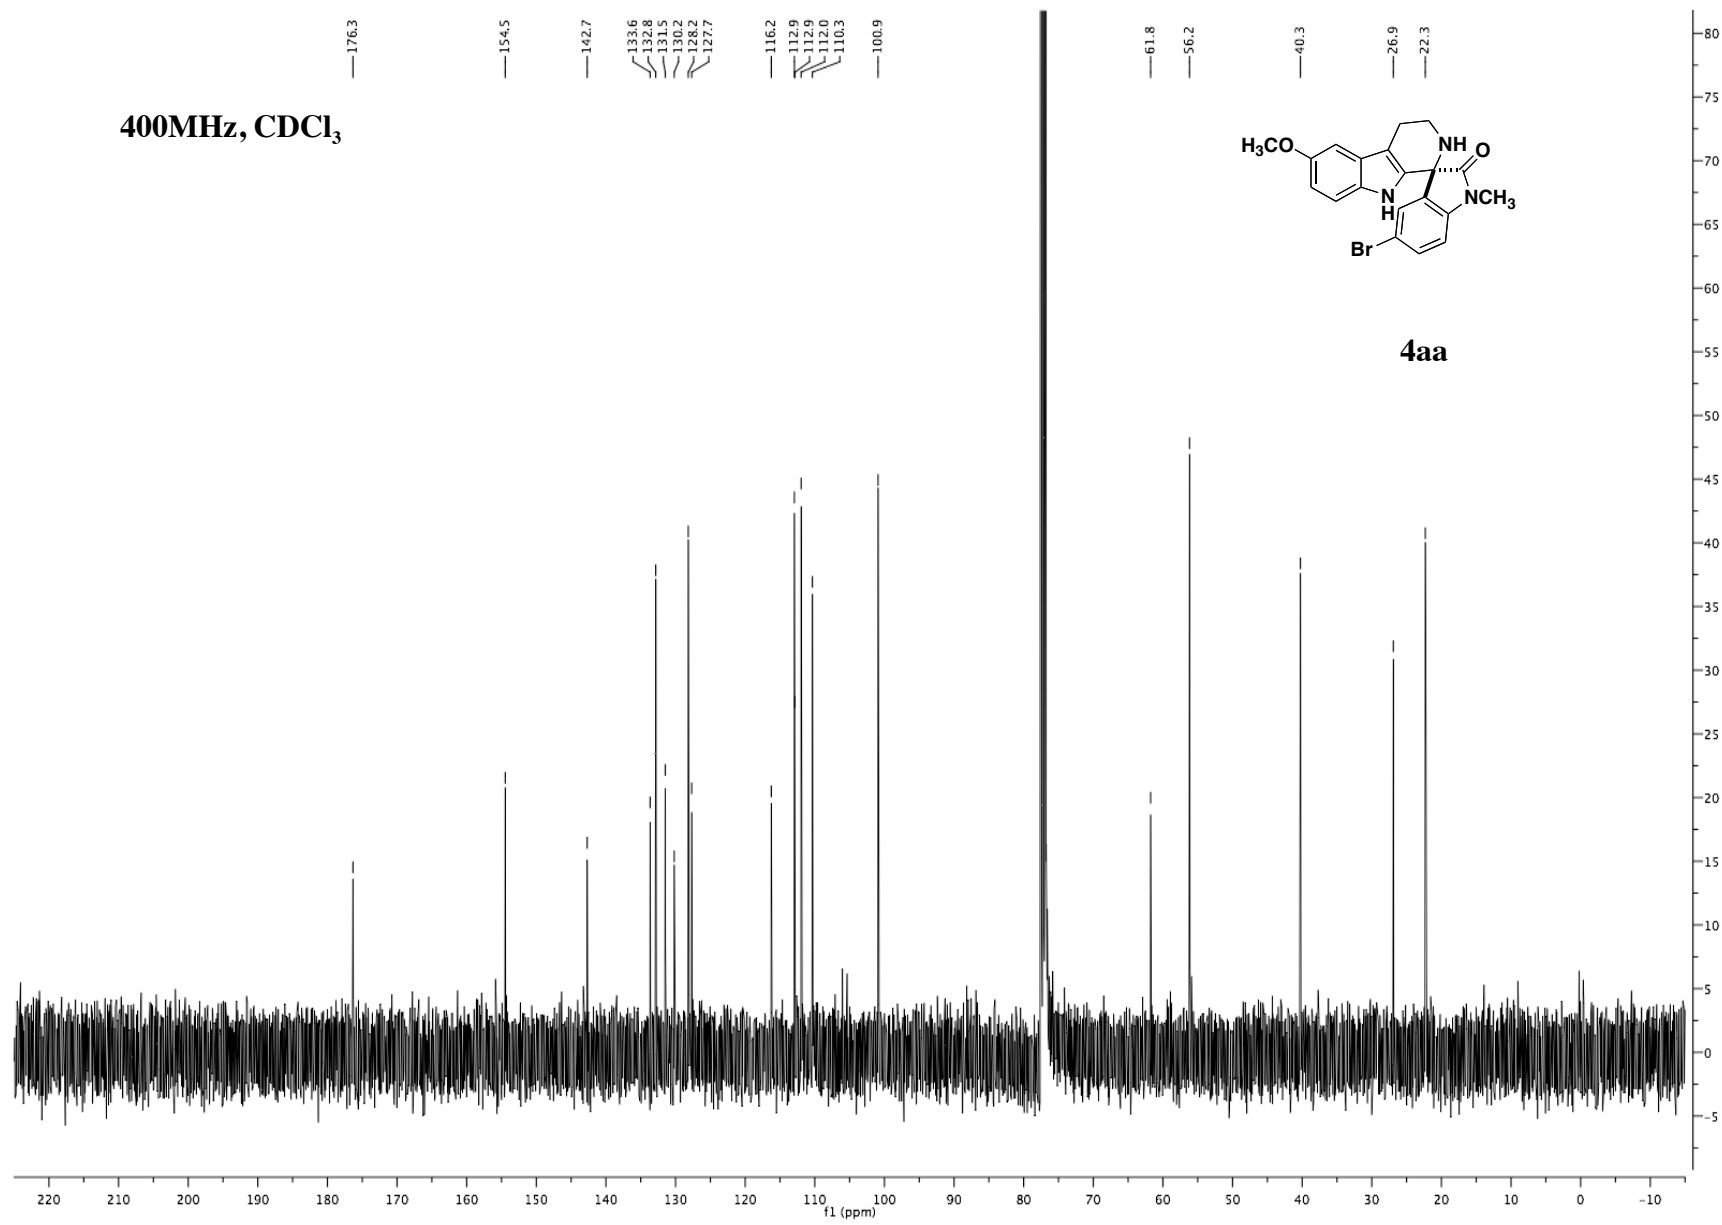

|||

|||

400MHz, CDCl<sub>3</sub>

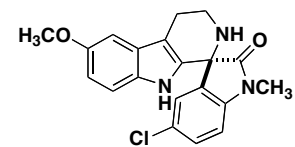

4ba

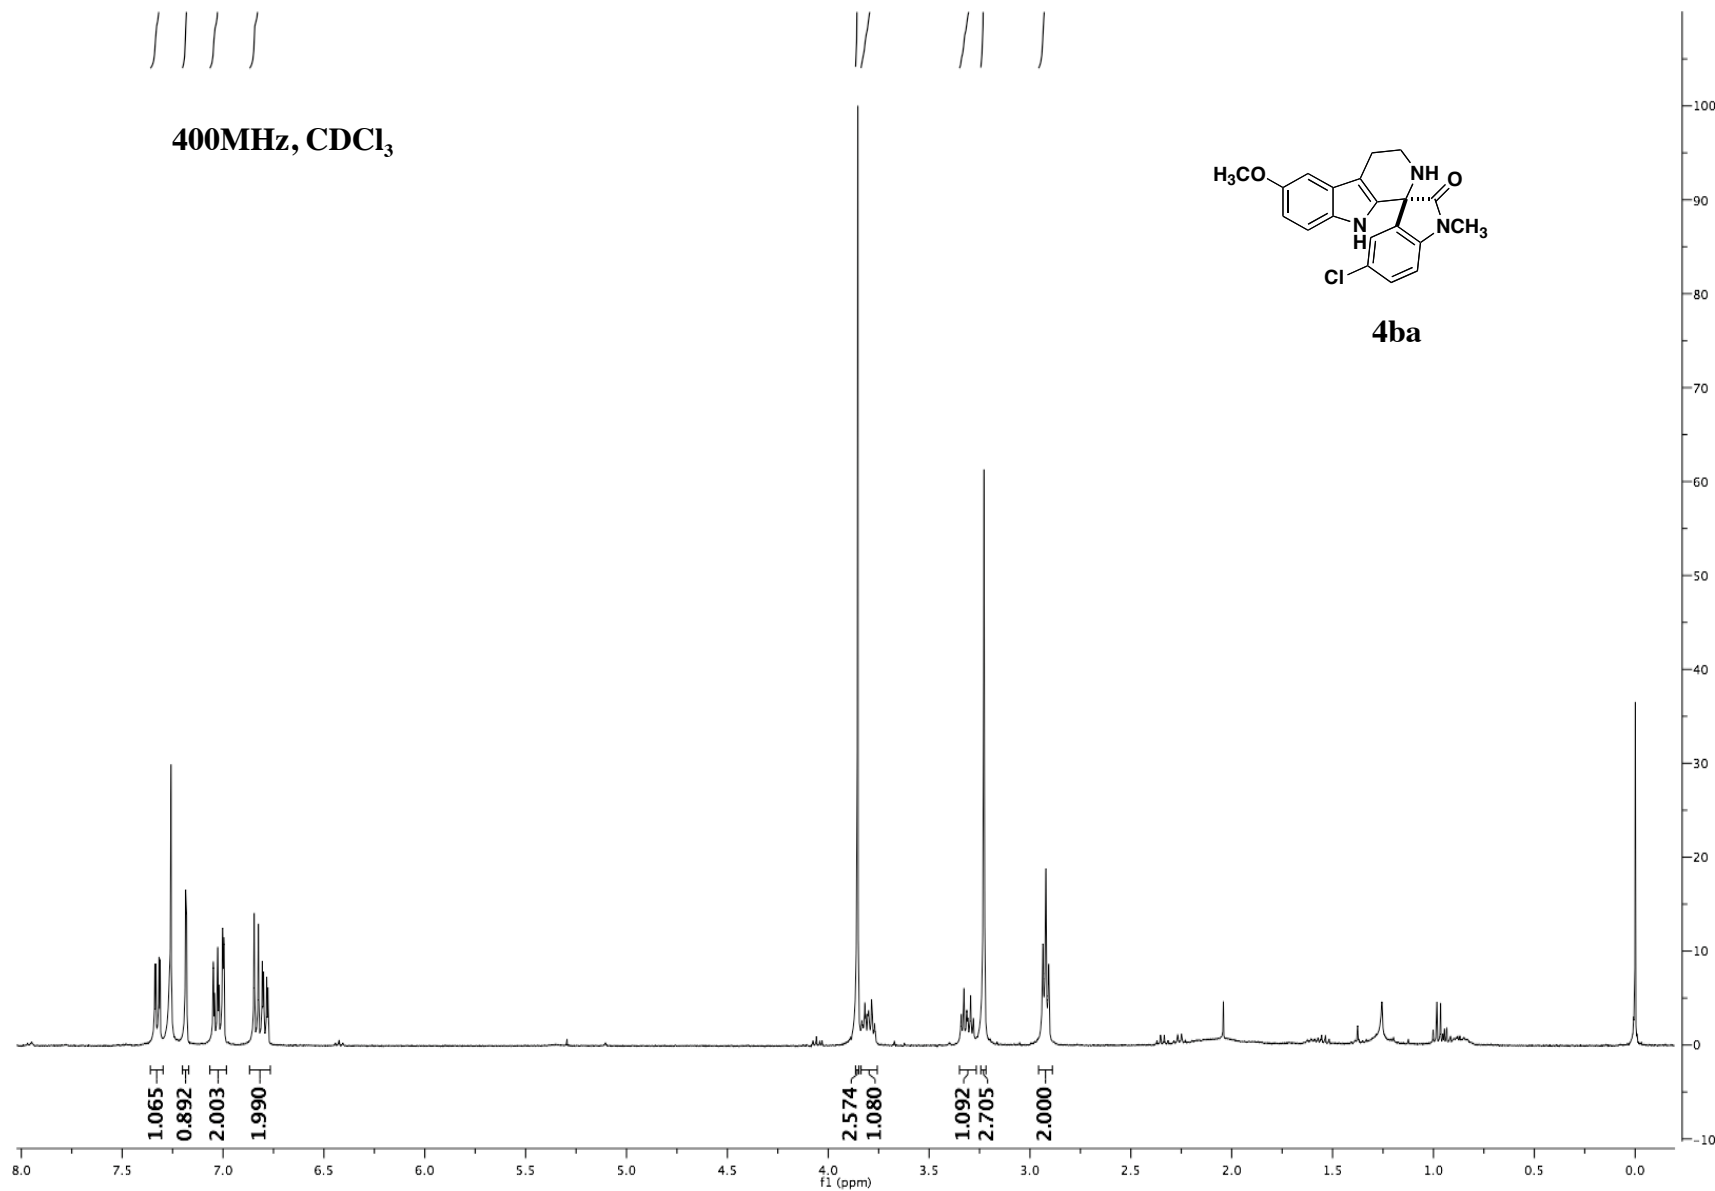

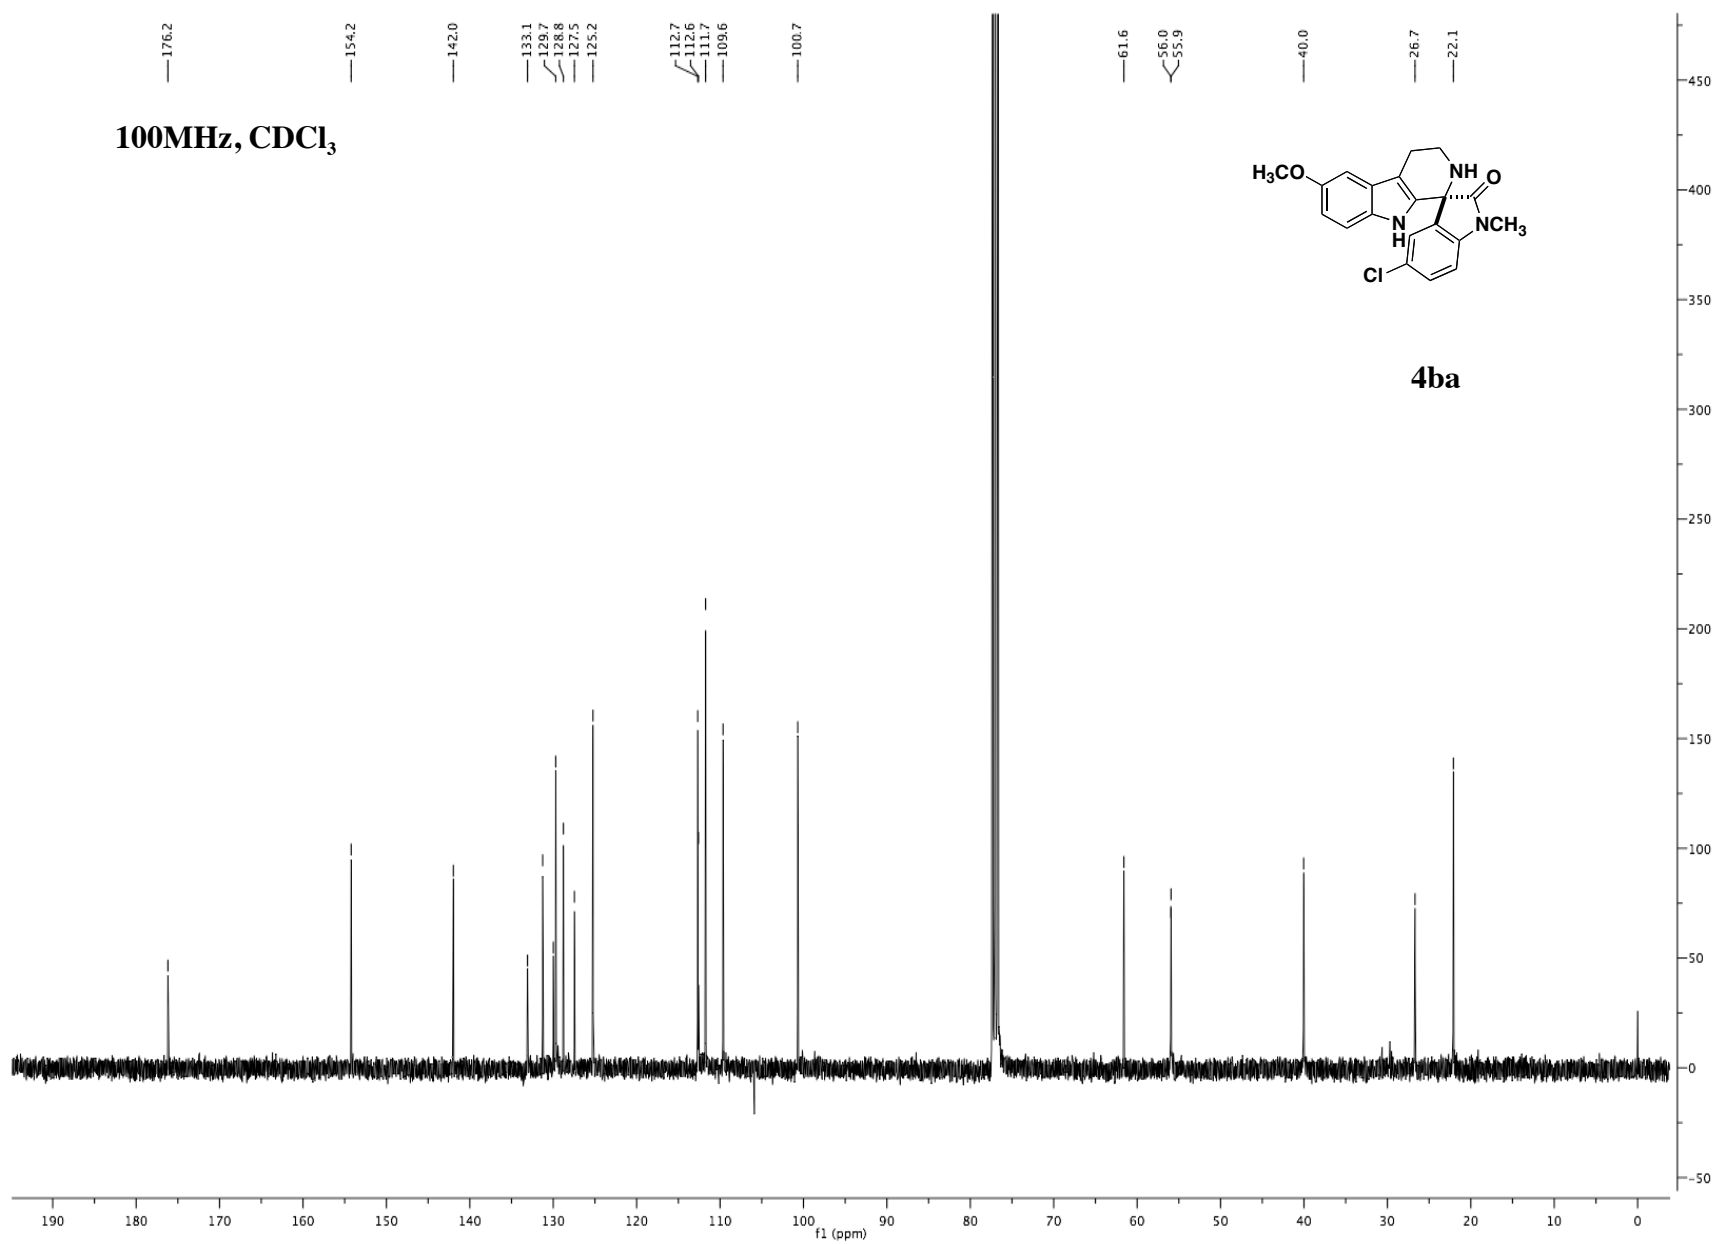

400MHz, CDCl<sub>3</sub>

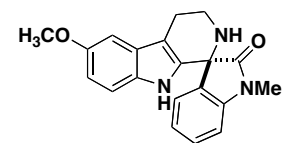

**4ca**

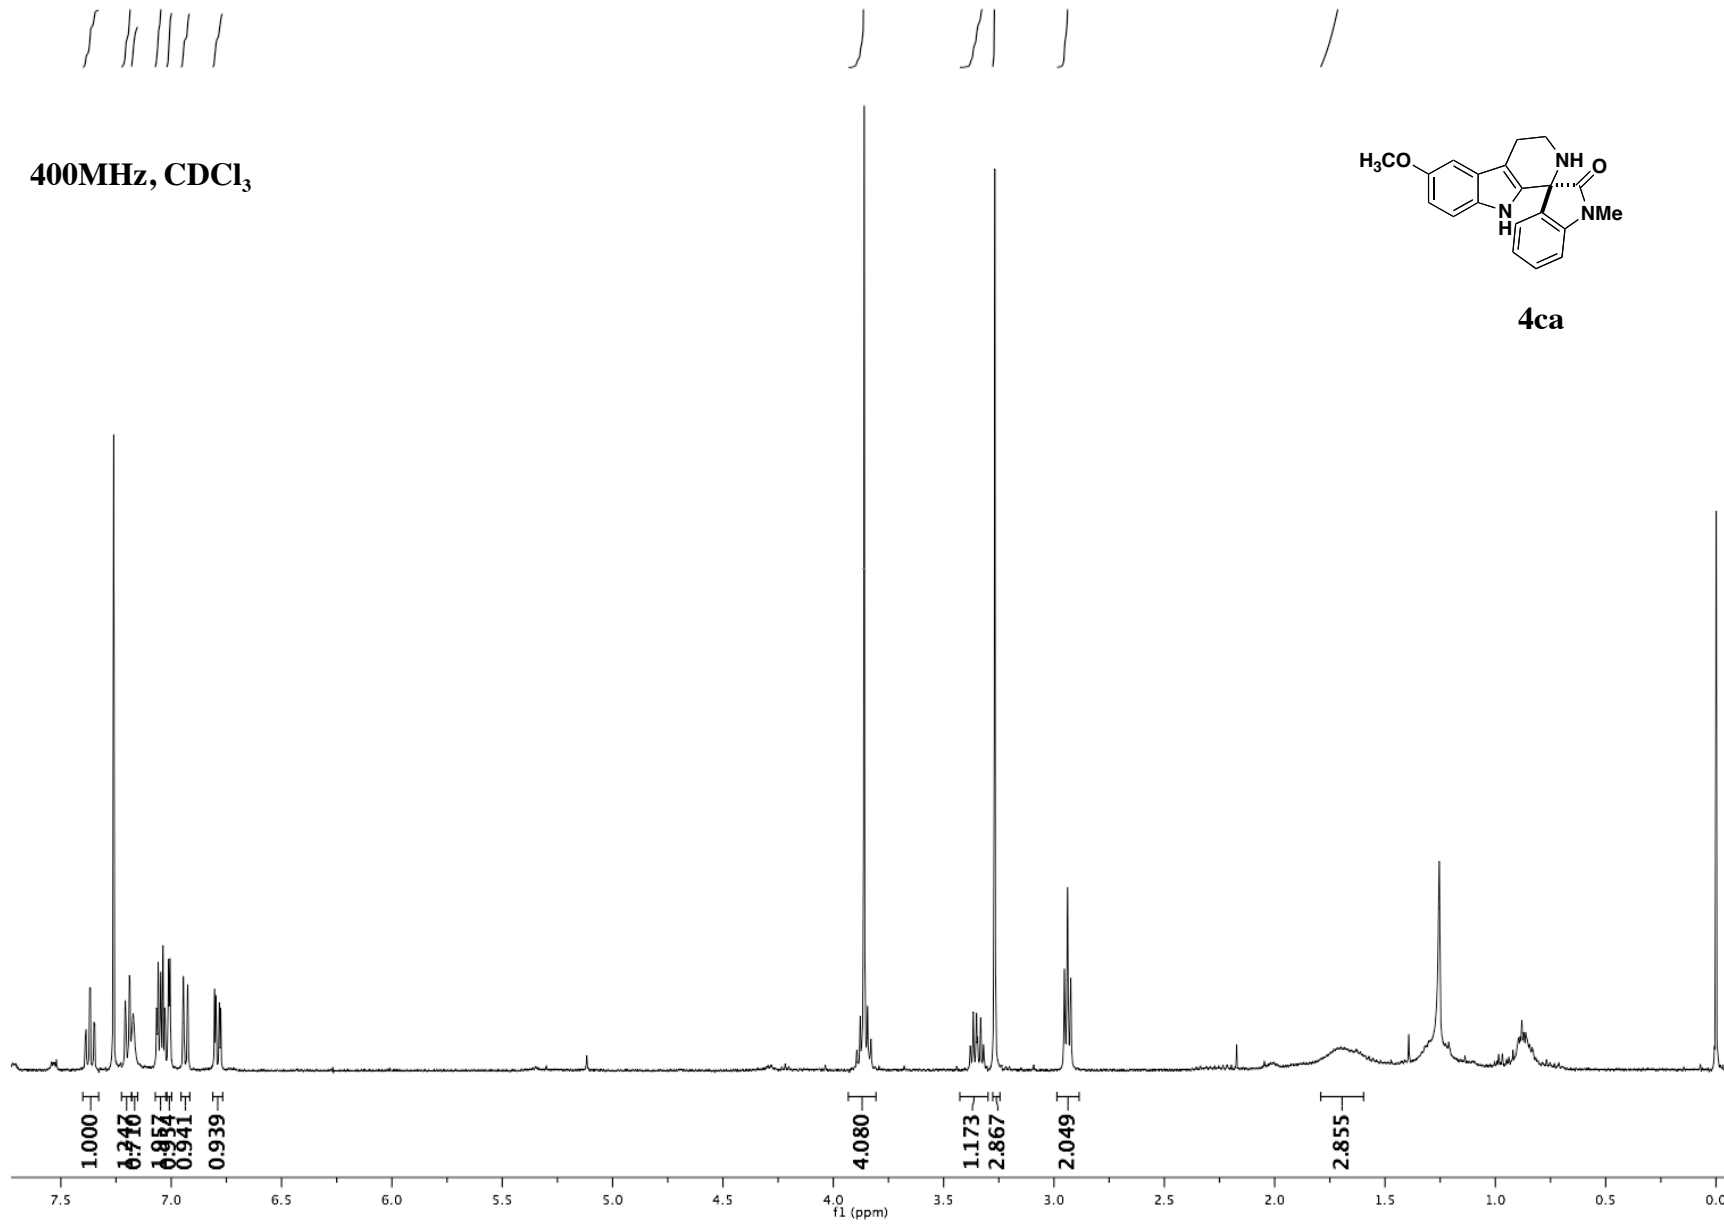

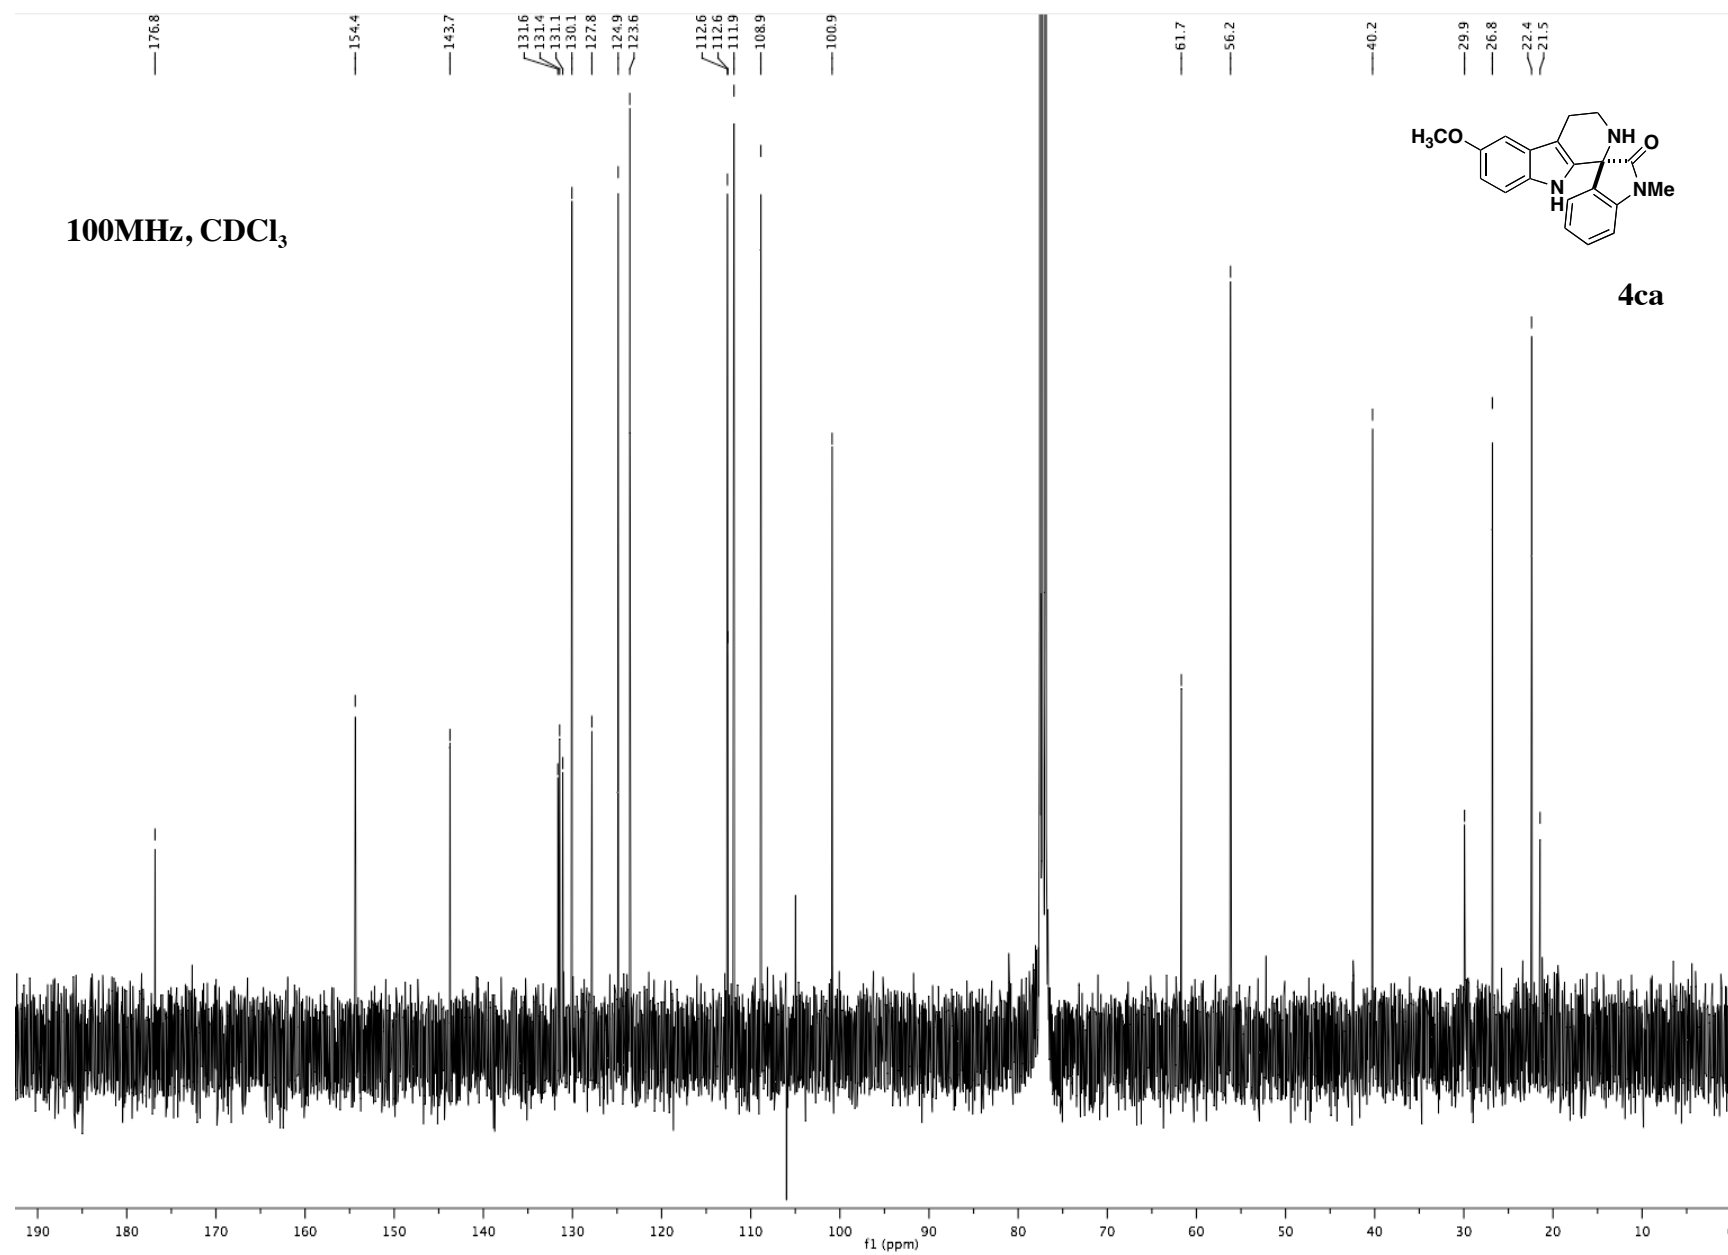

400MHz, CDCl<sub>3</sub>

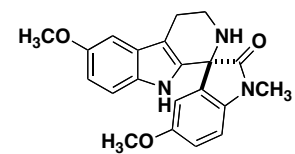

4da

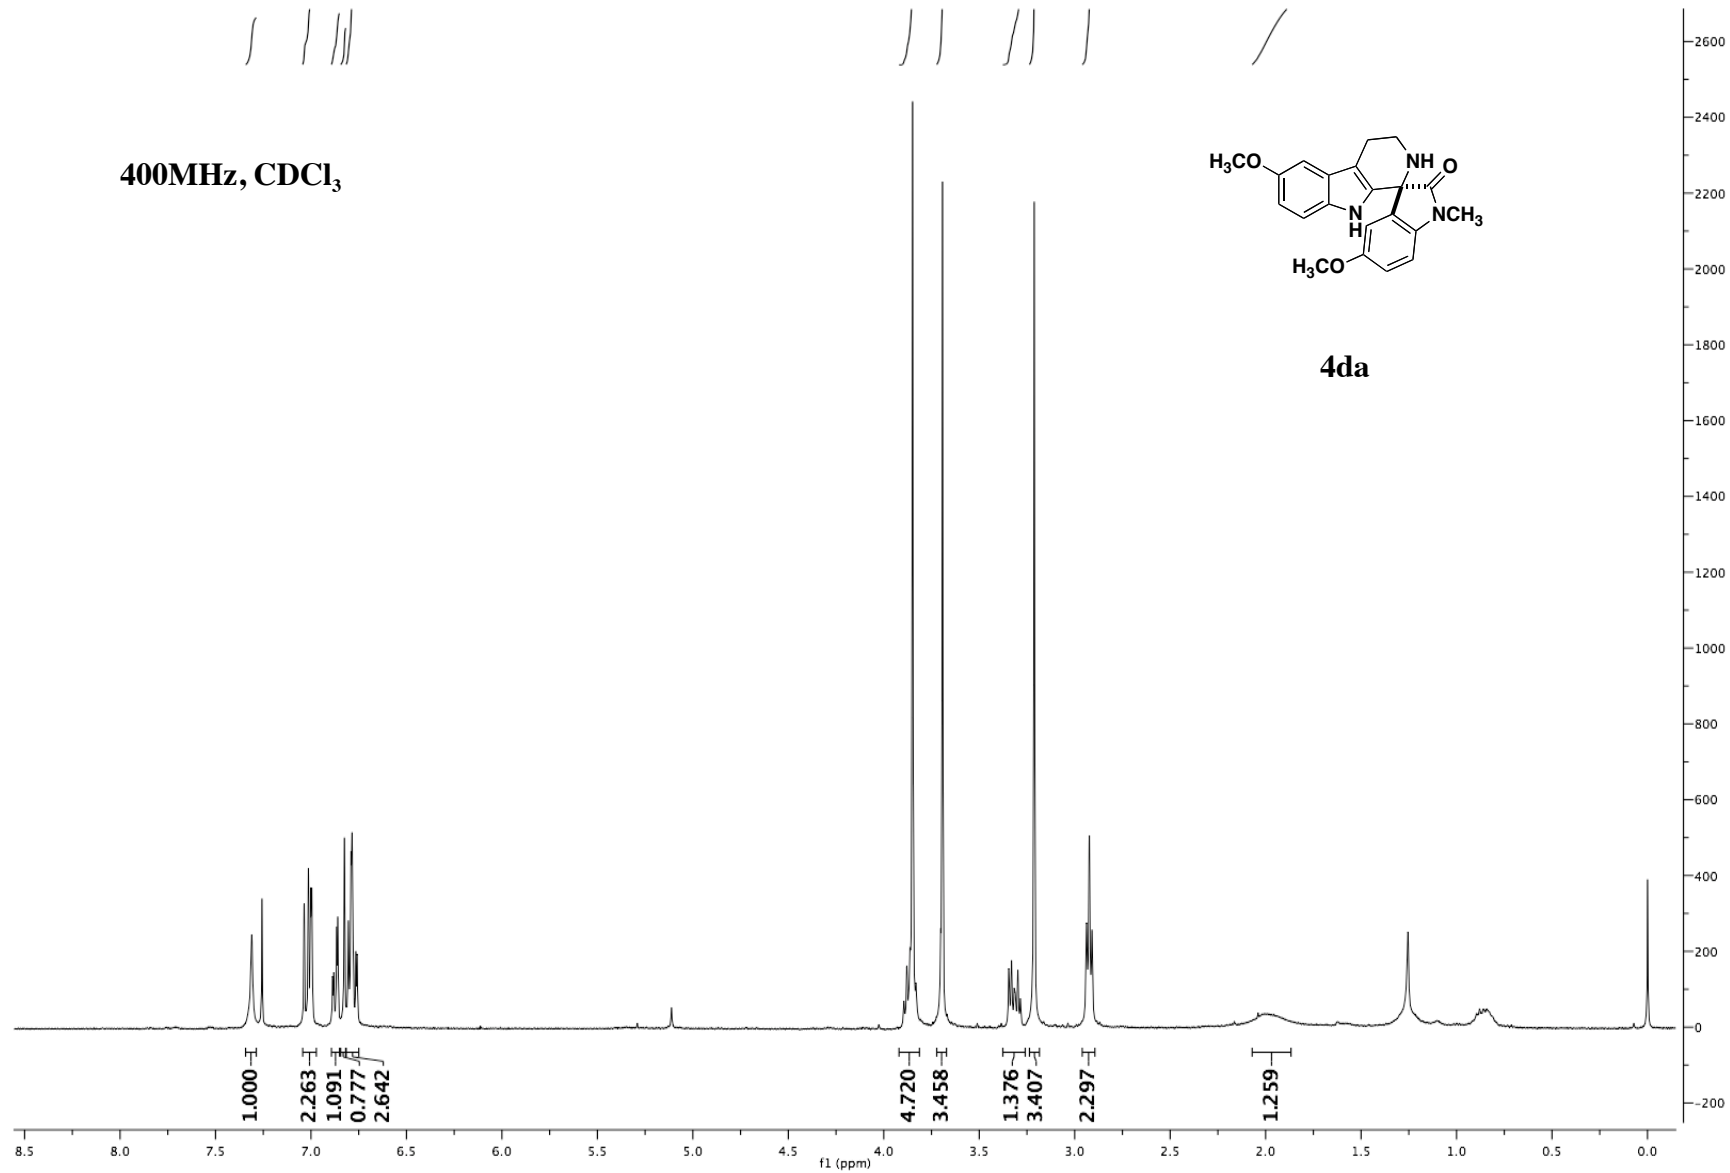

100MHz, CDCl<sub>3</sub>

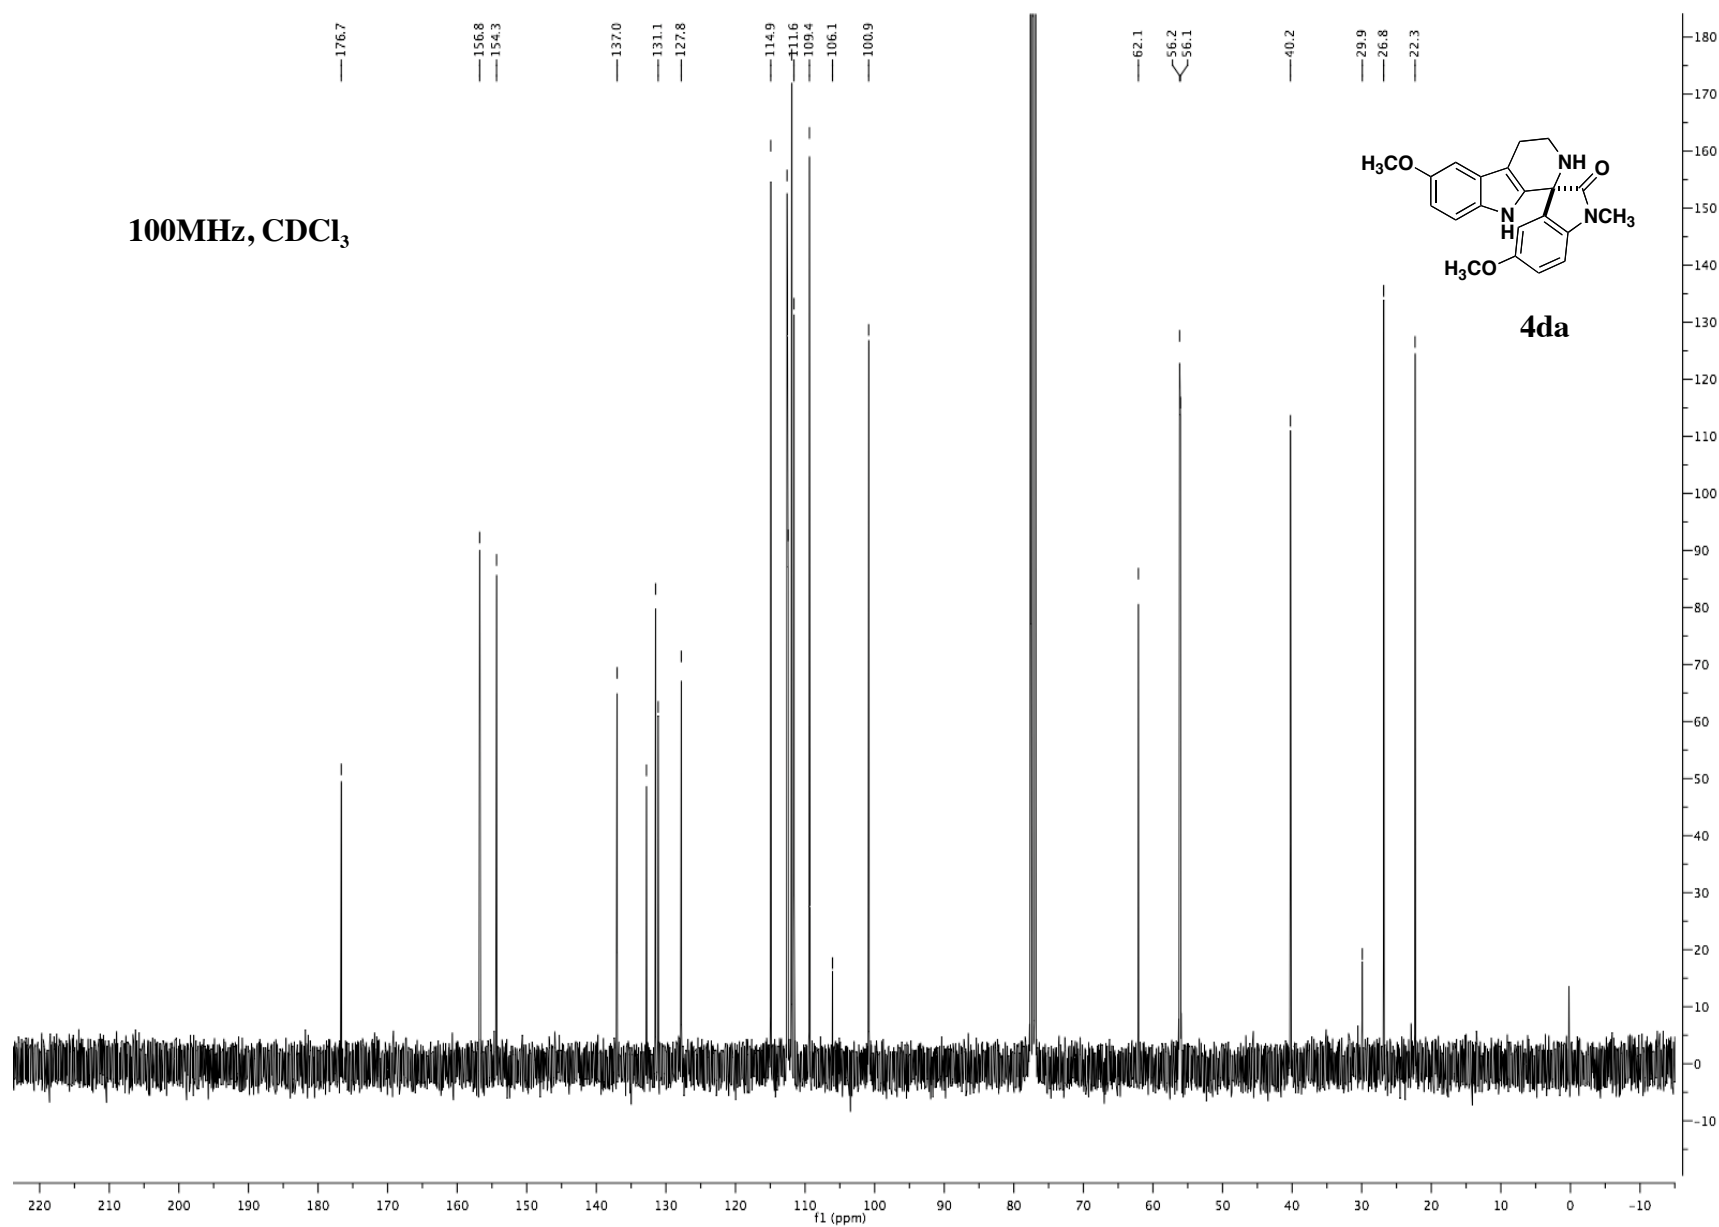

400MHz, CDCl<sub>3</sub>

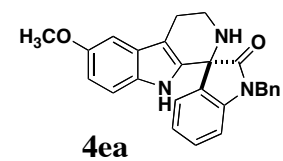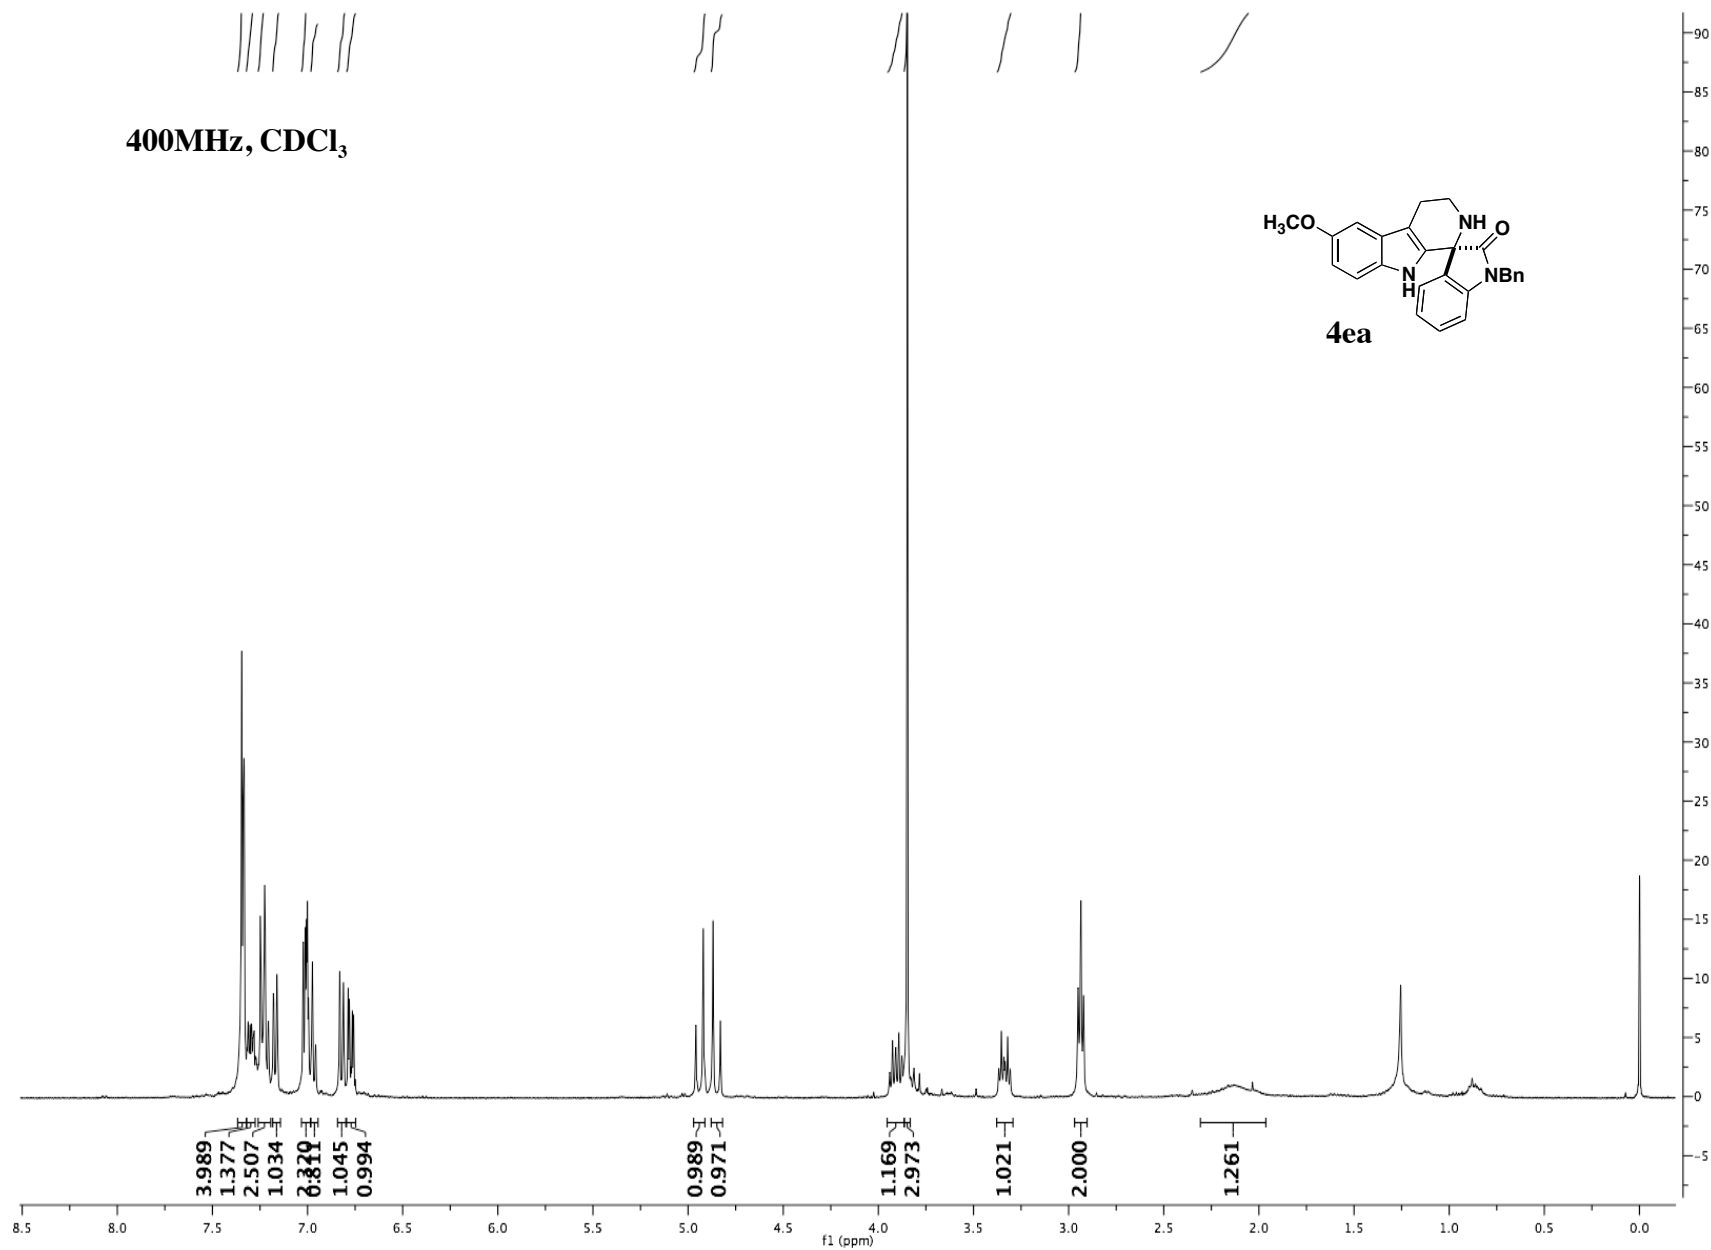

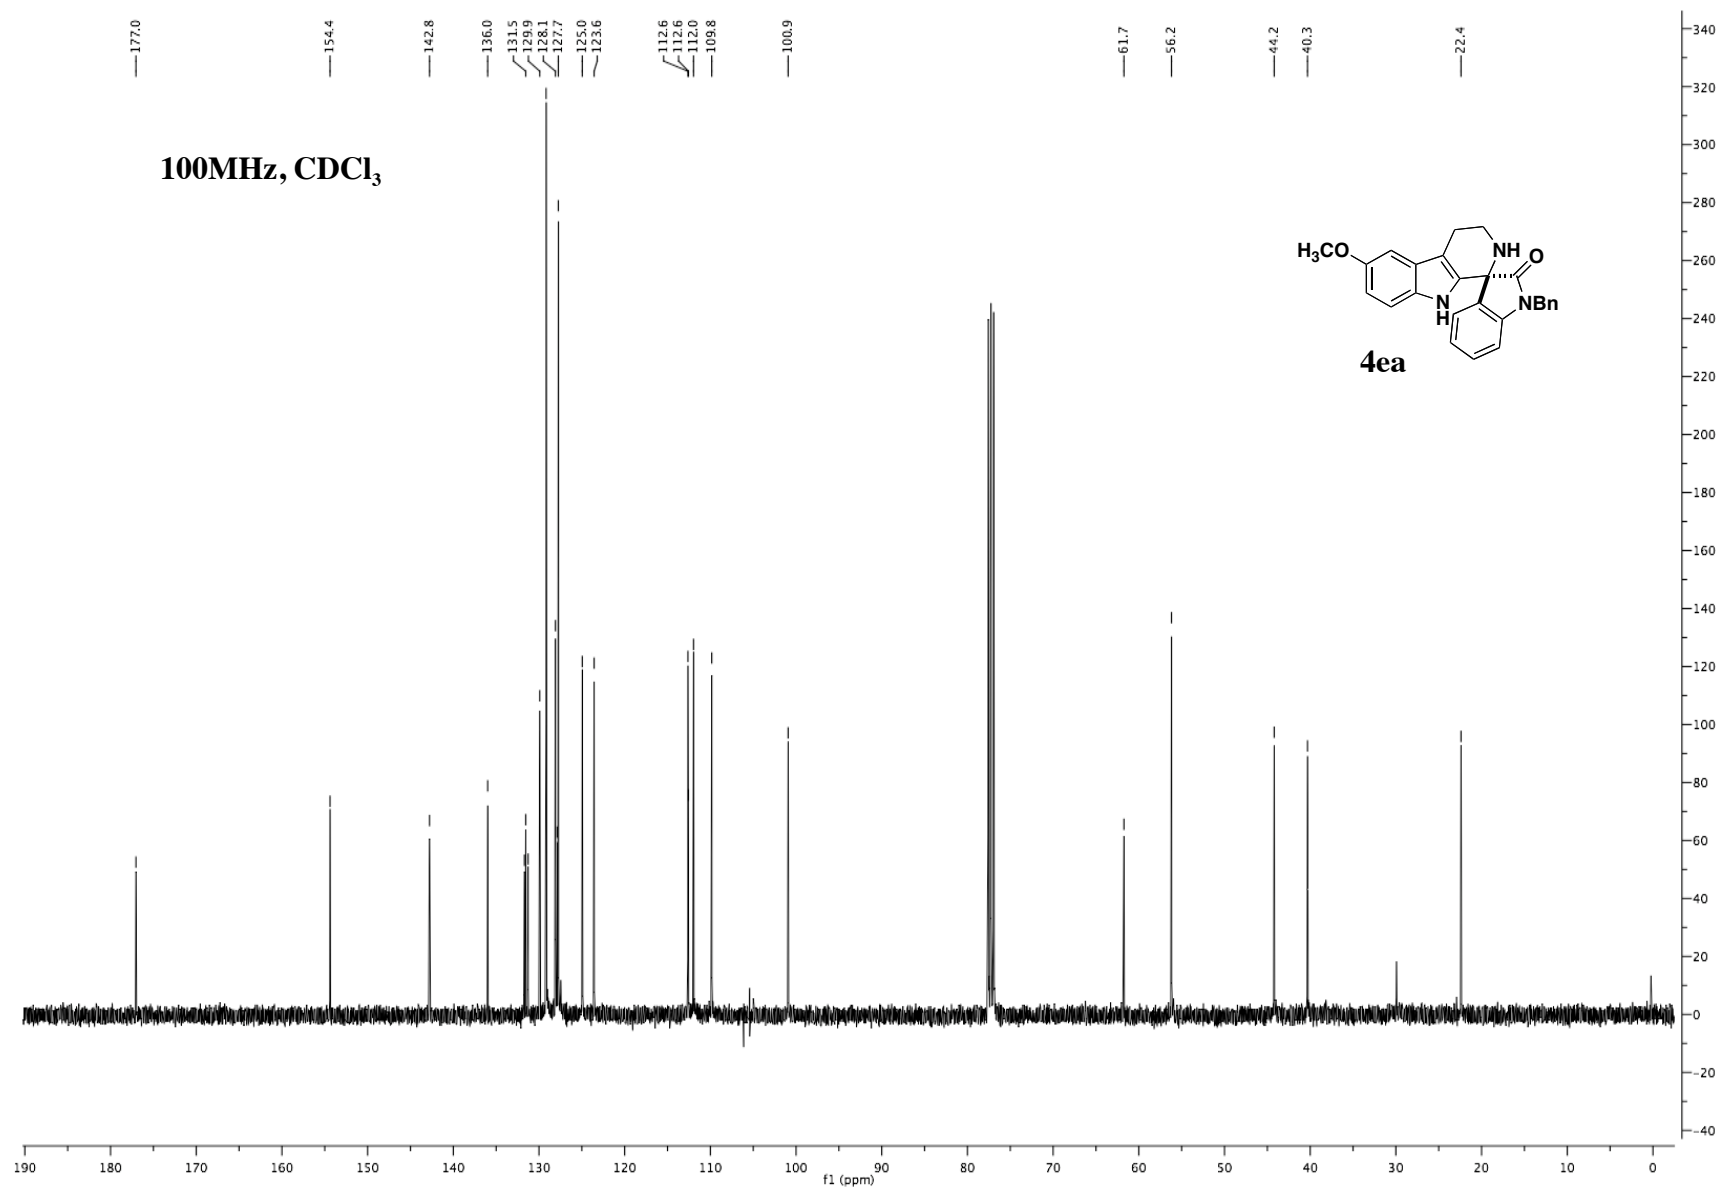

300MHz, CDCl<sub>3</sub>

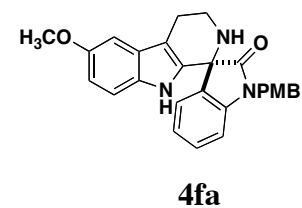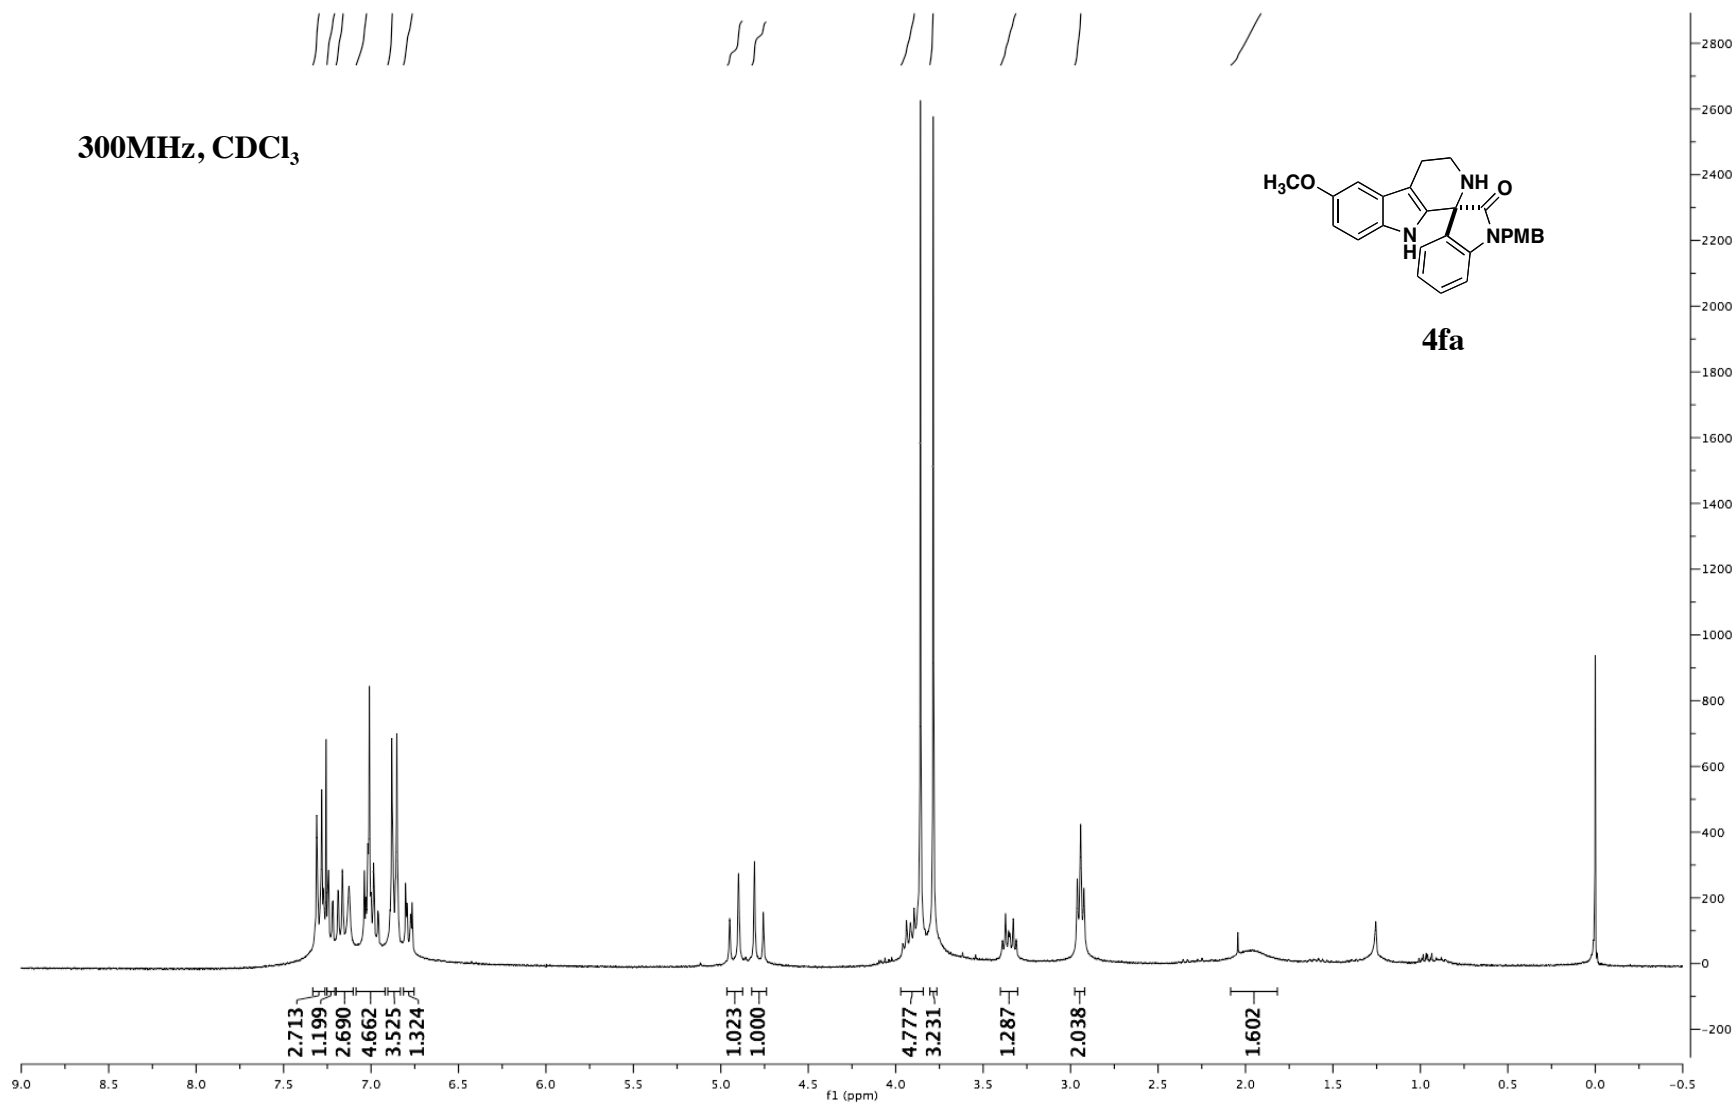

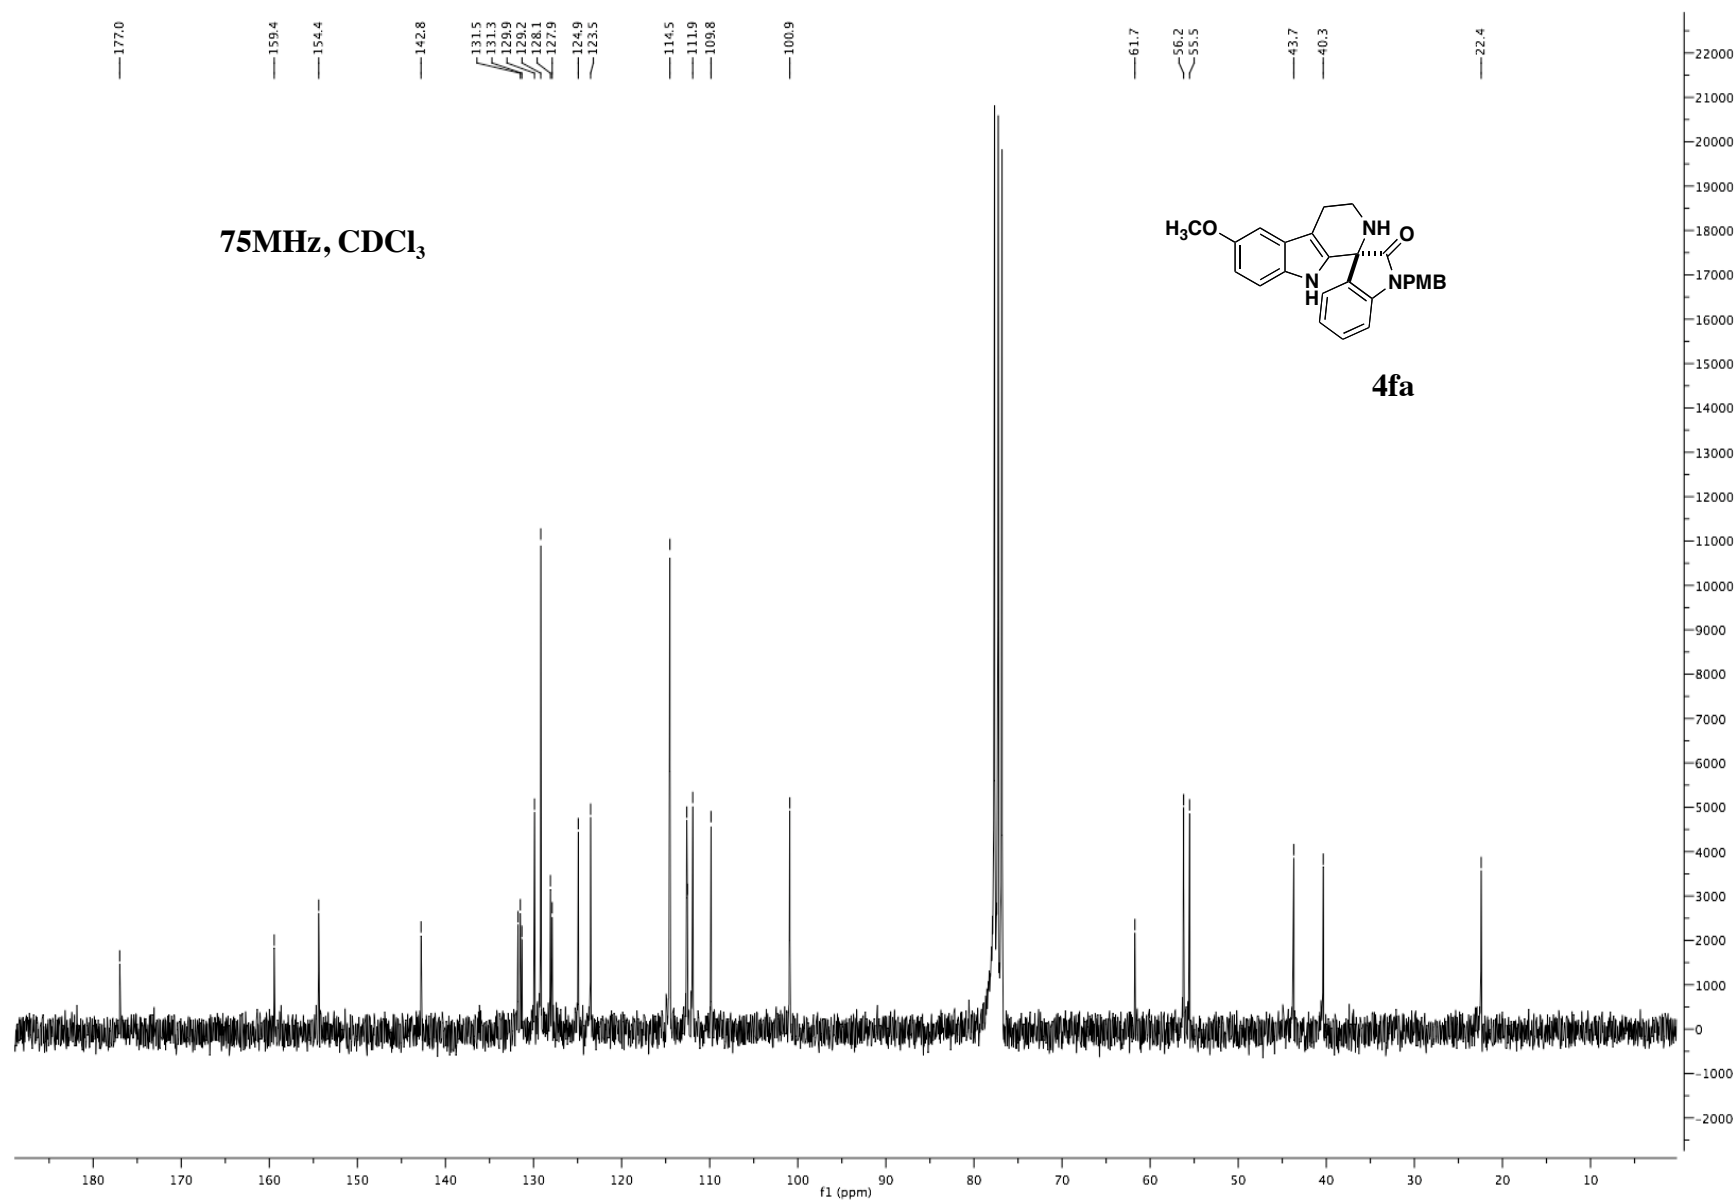

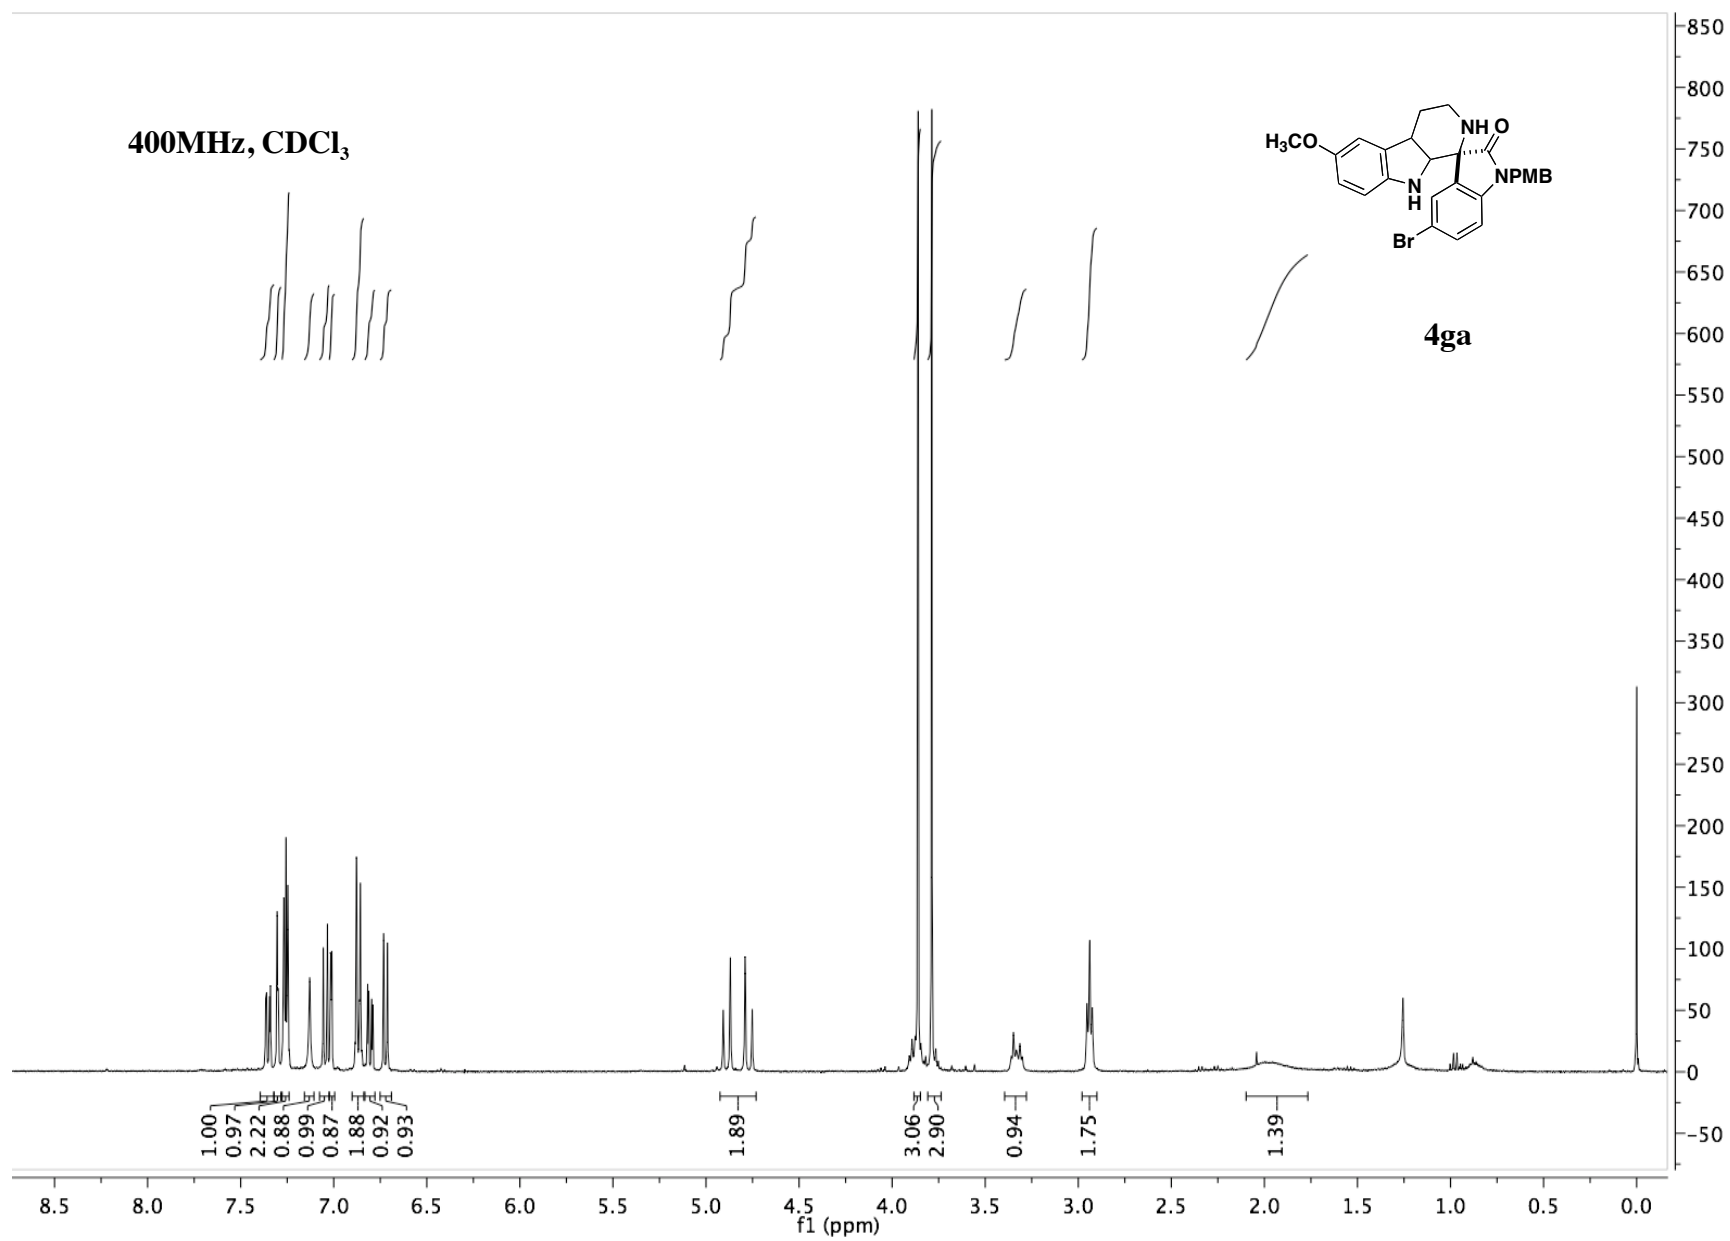

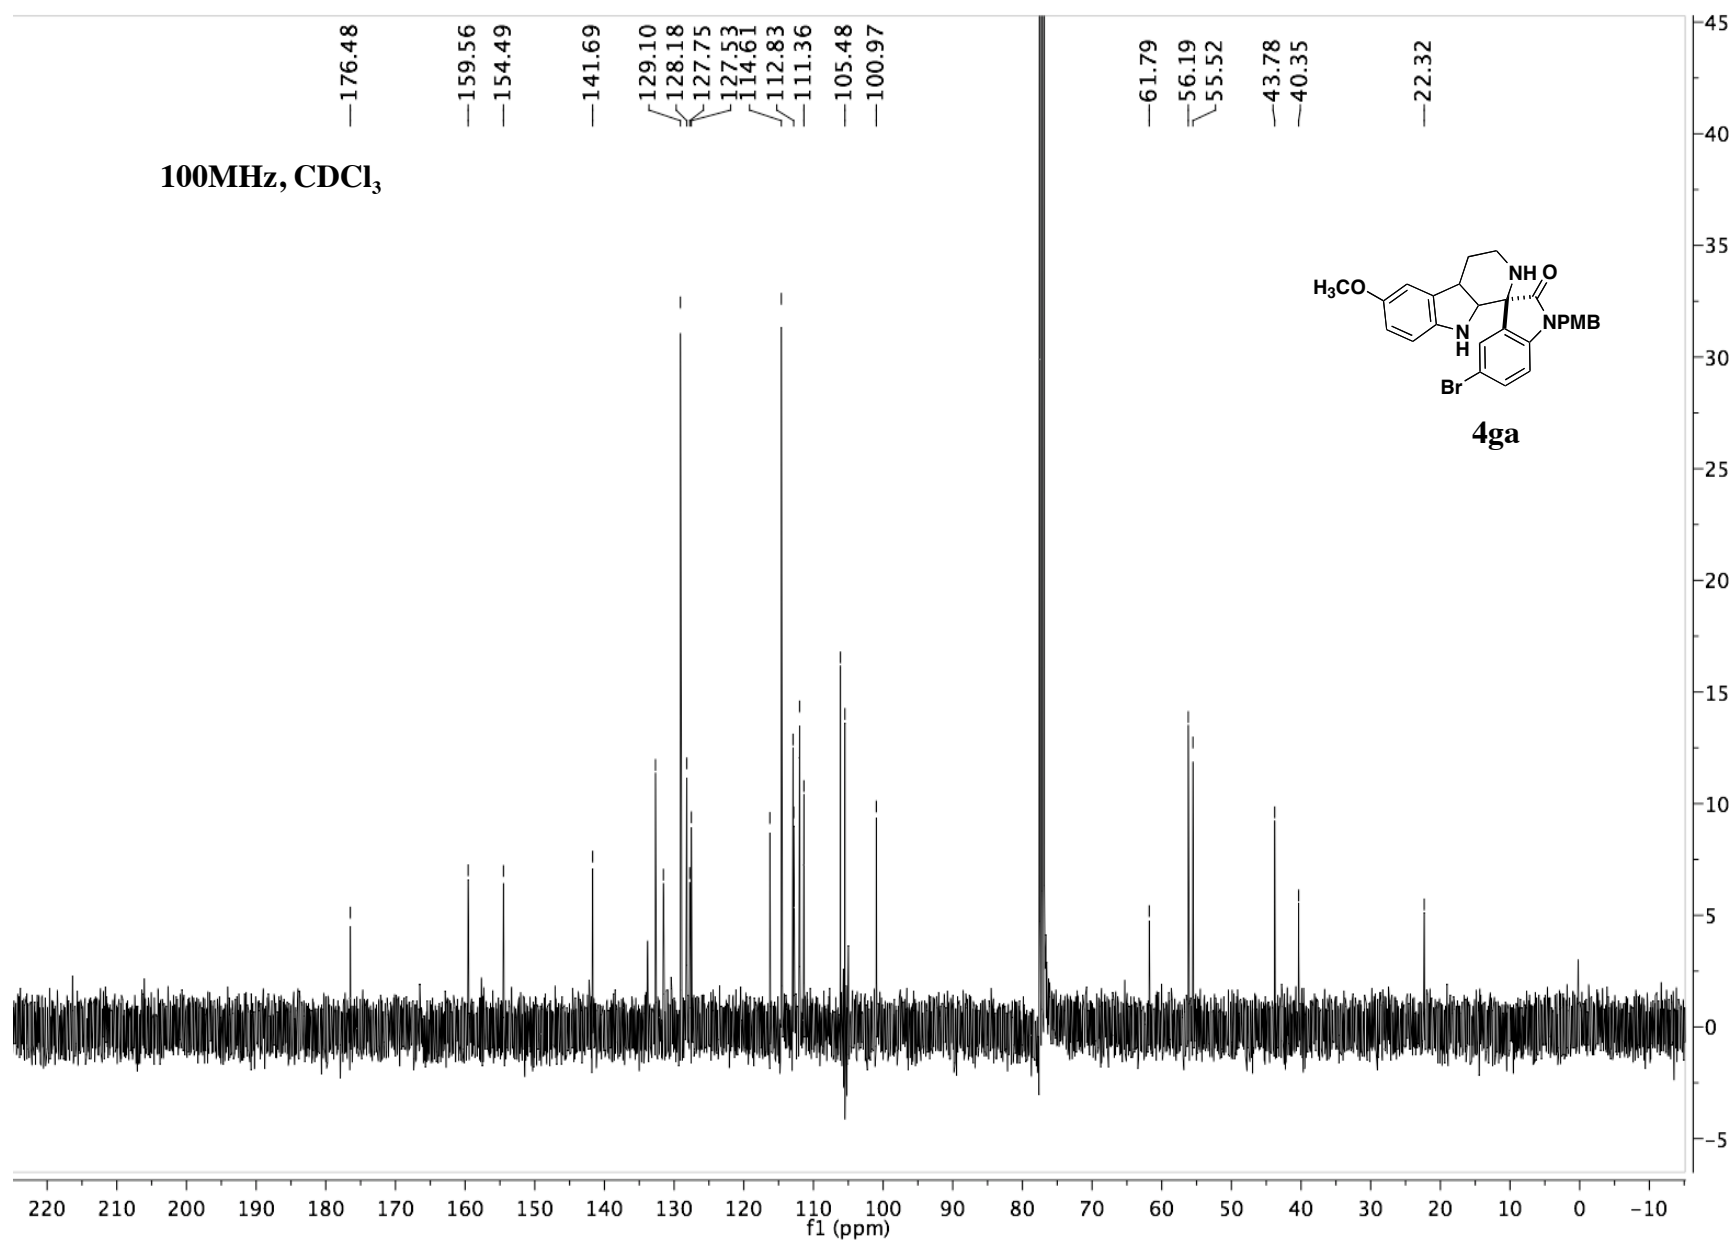

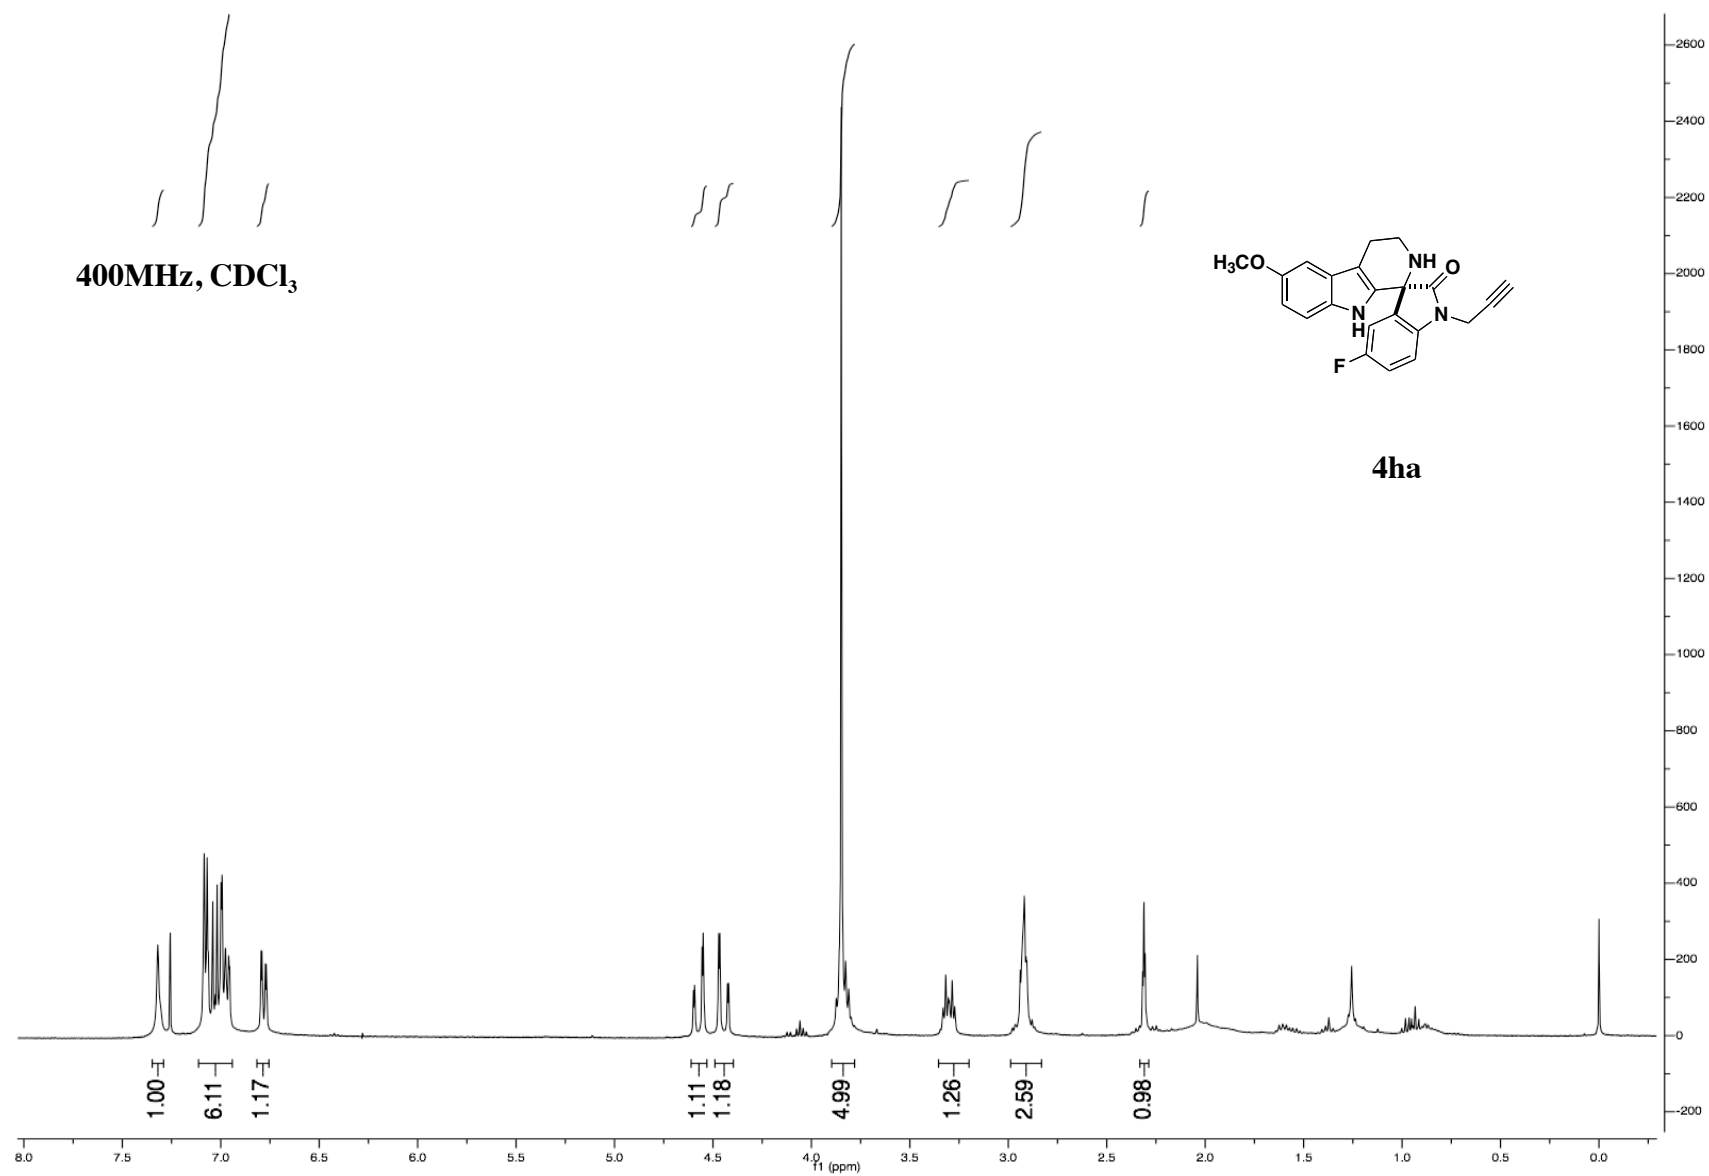

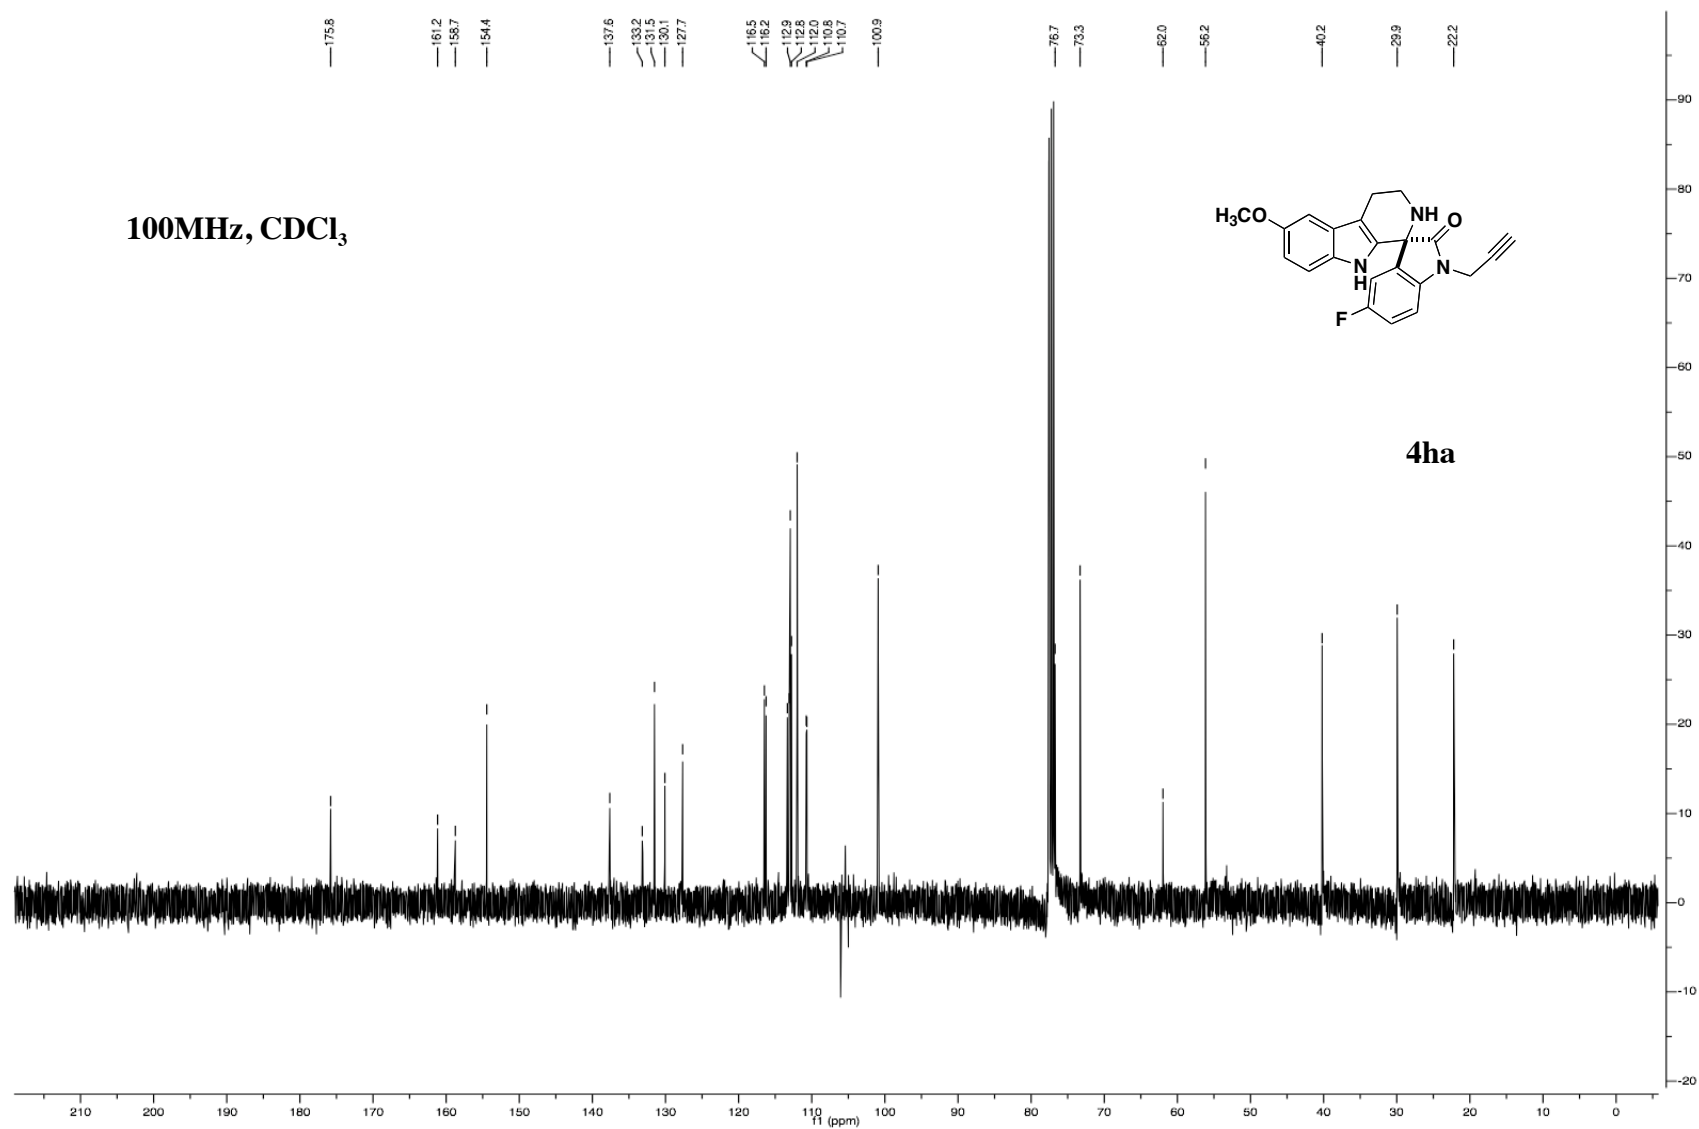

400MHz, CDCl<sub>3</sub>

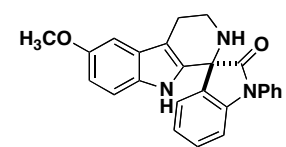

4ia

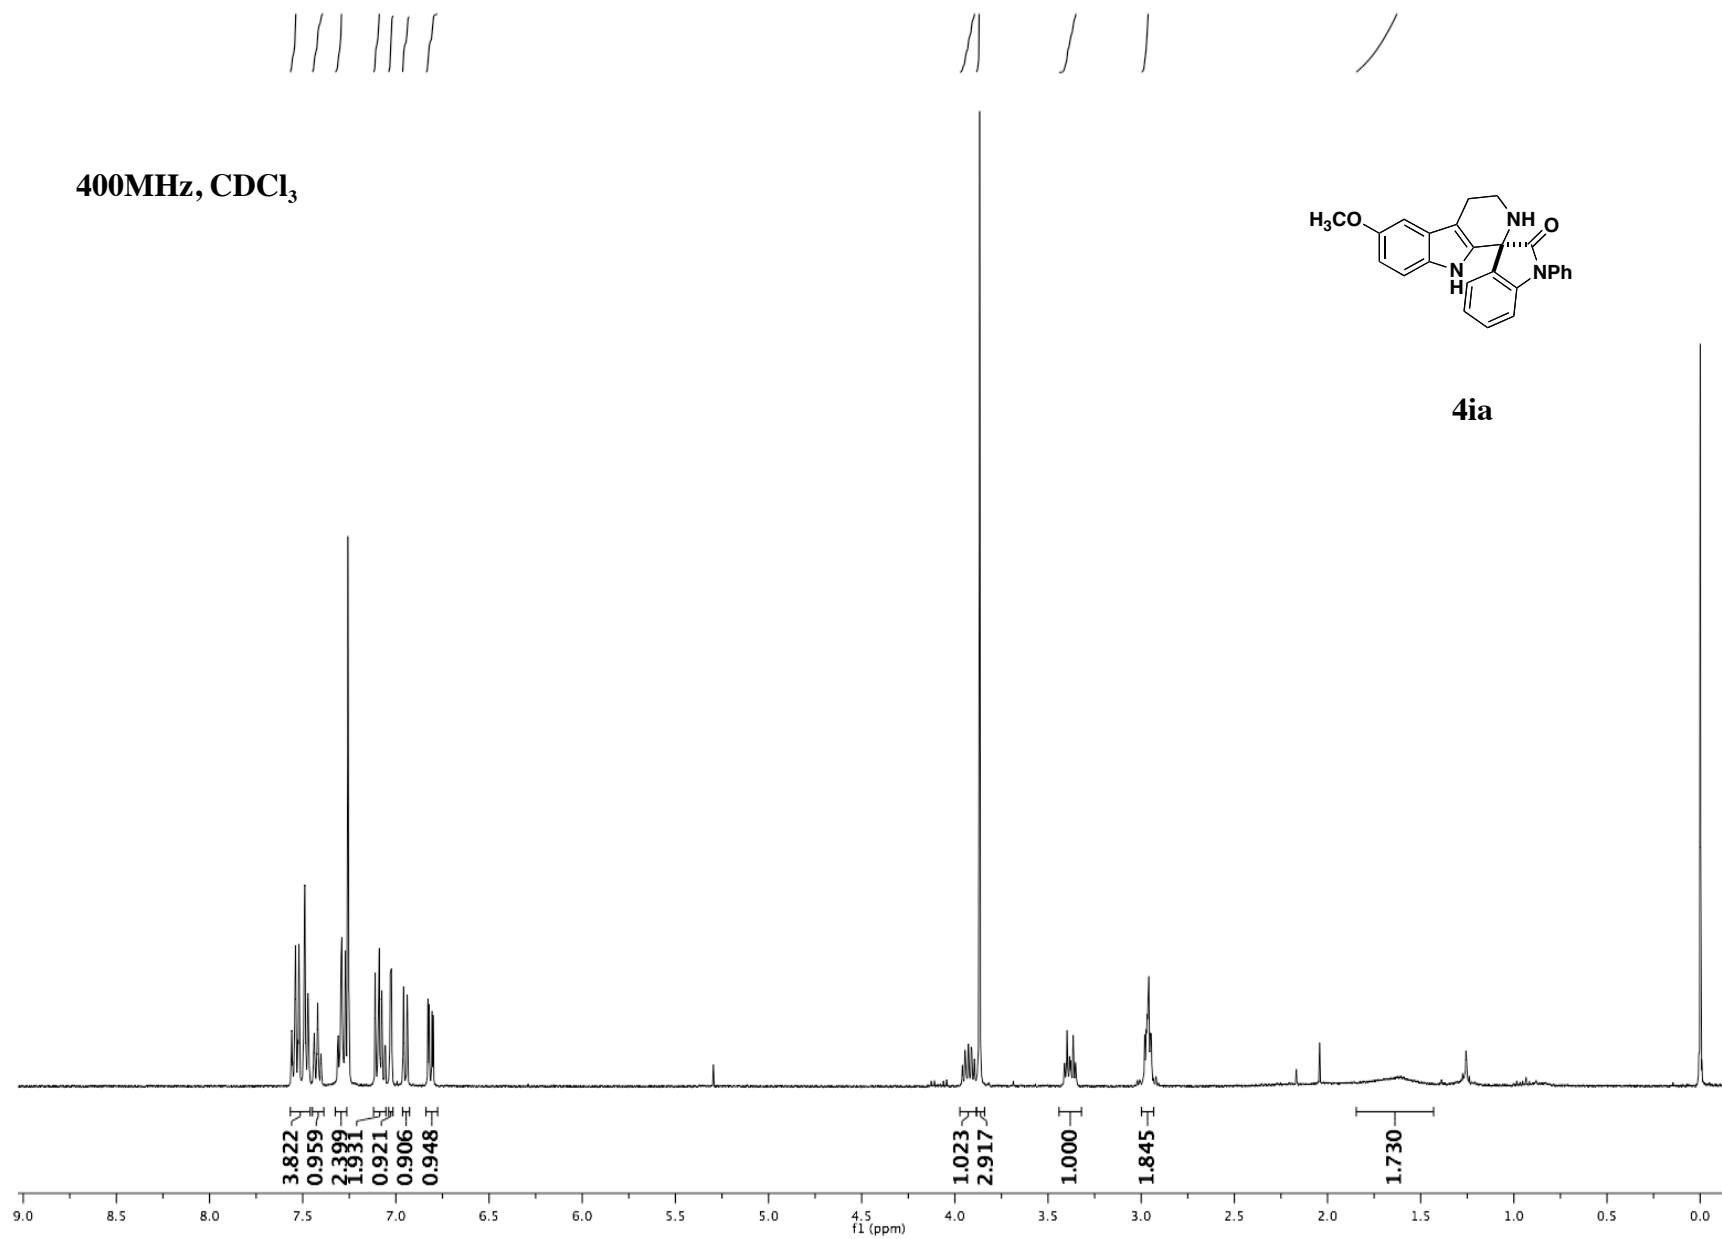

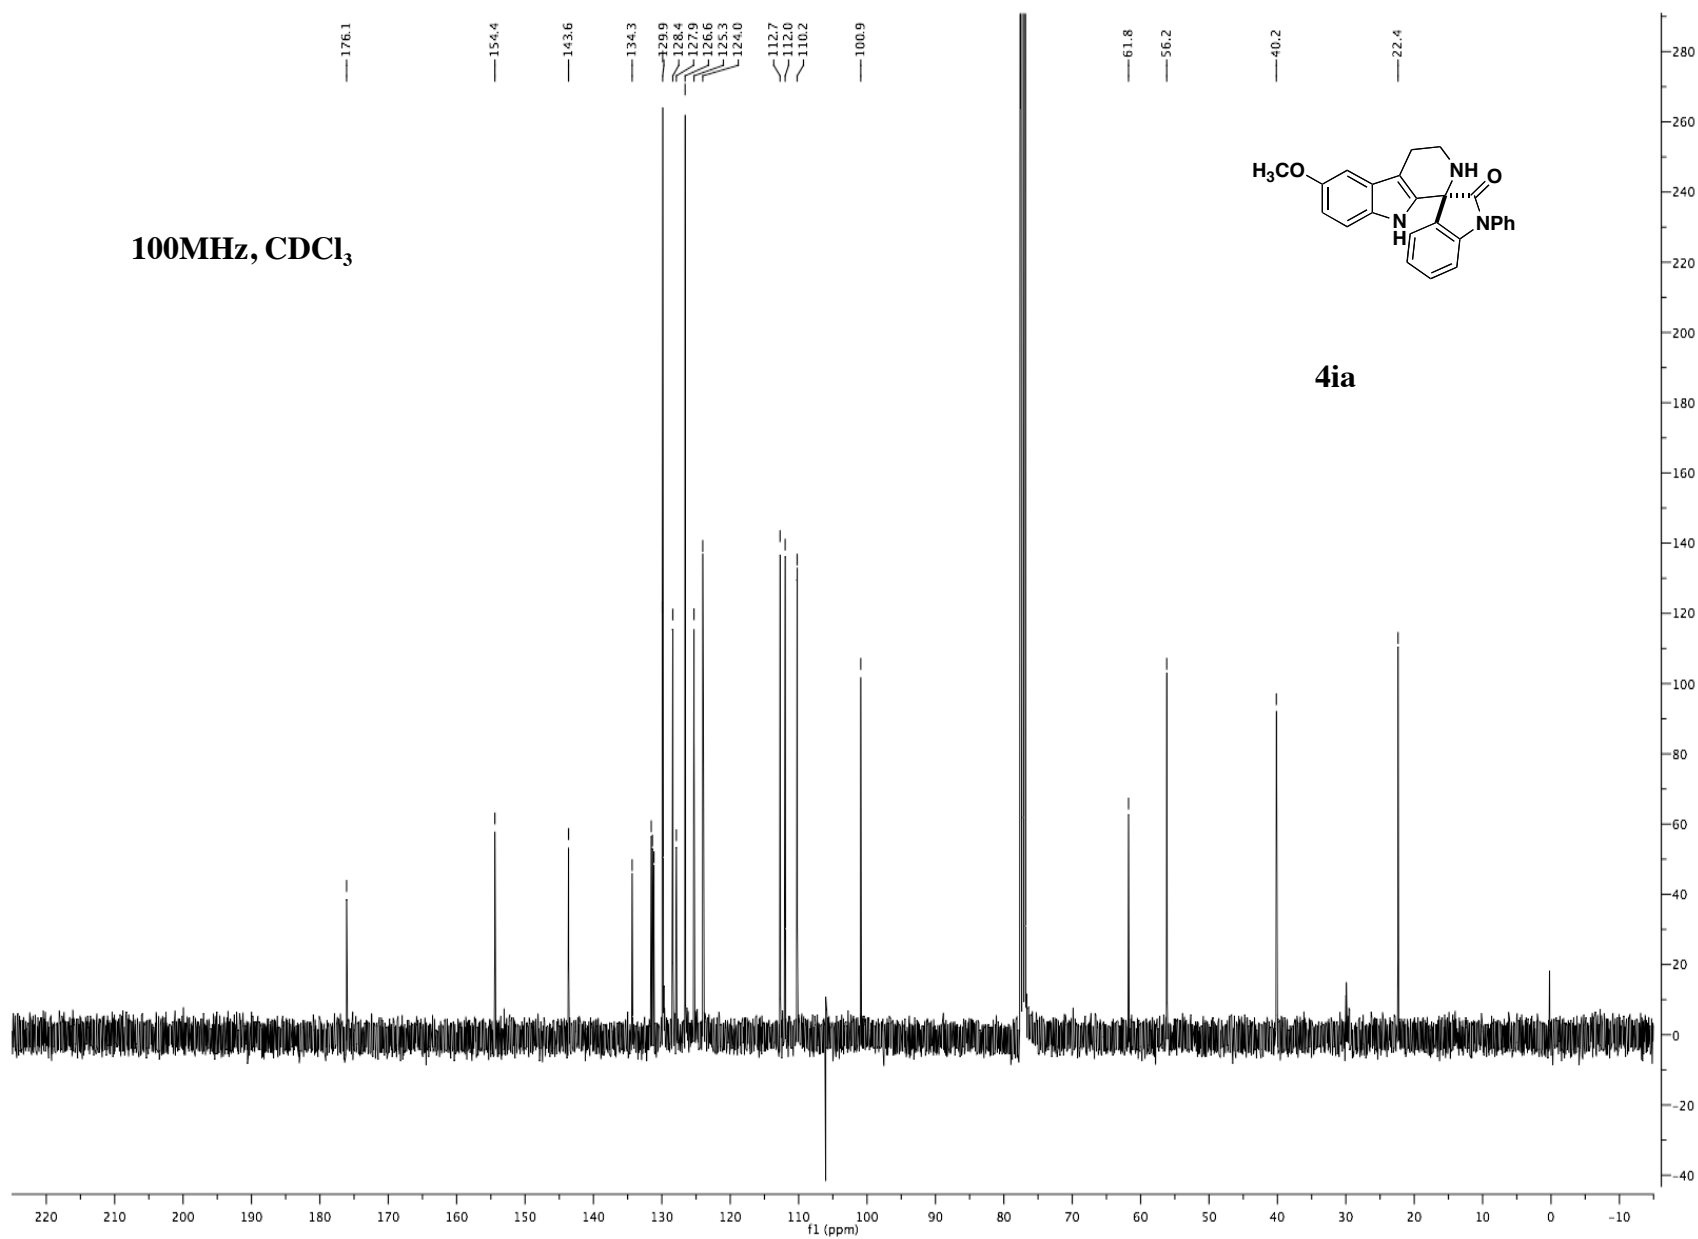

400MHz, CDCl<sub>3</sub>

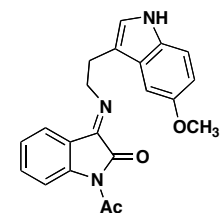

4ja

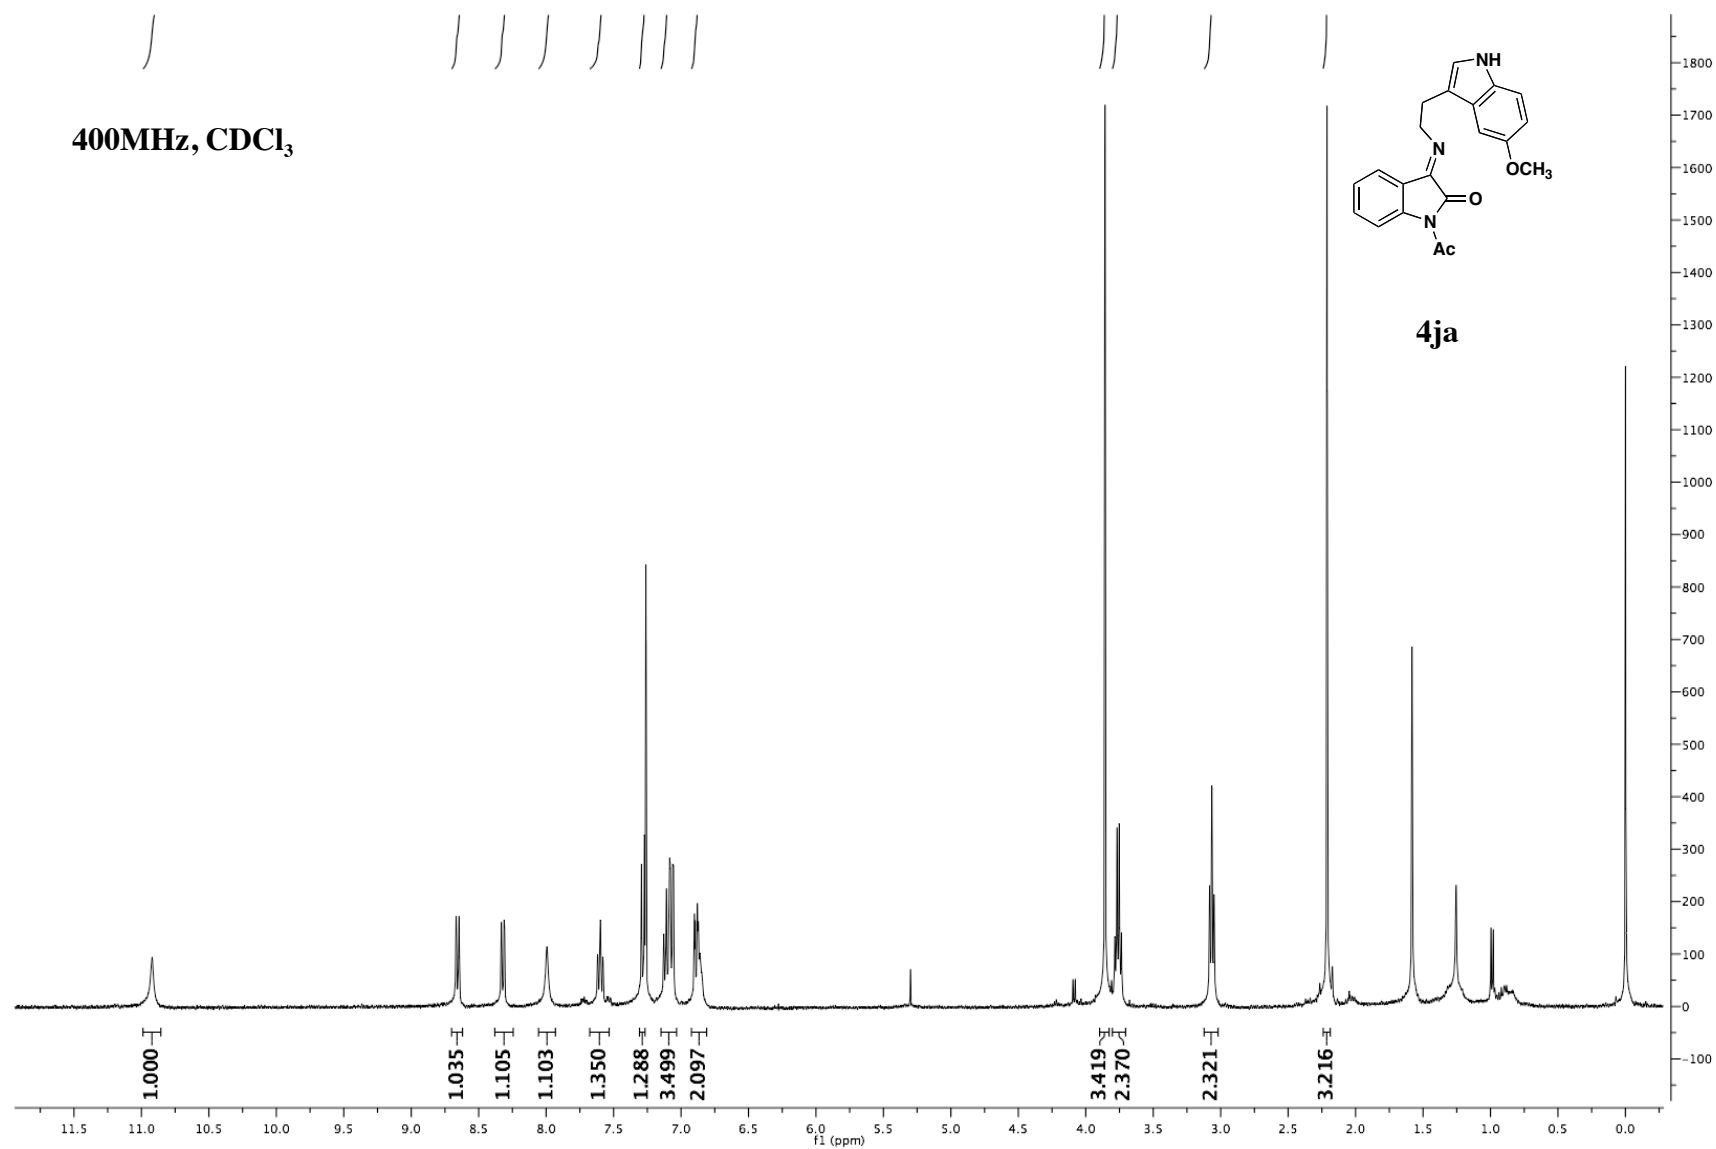

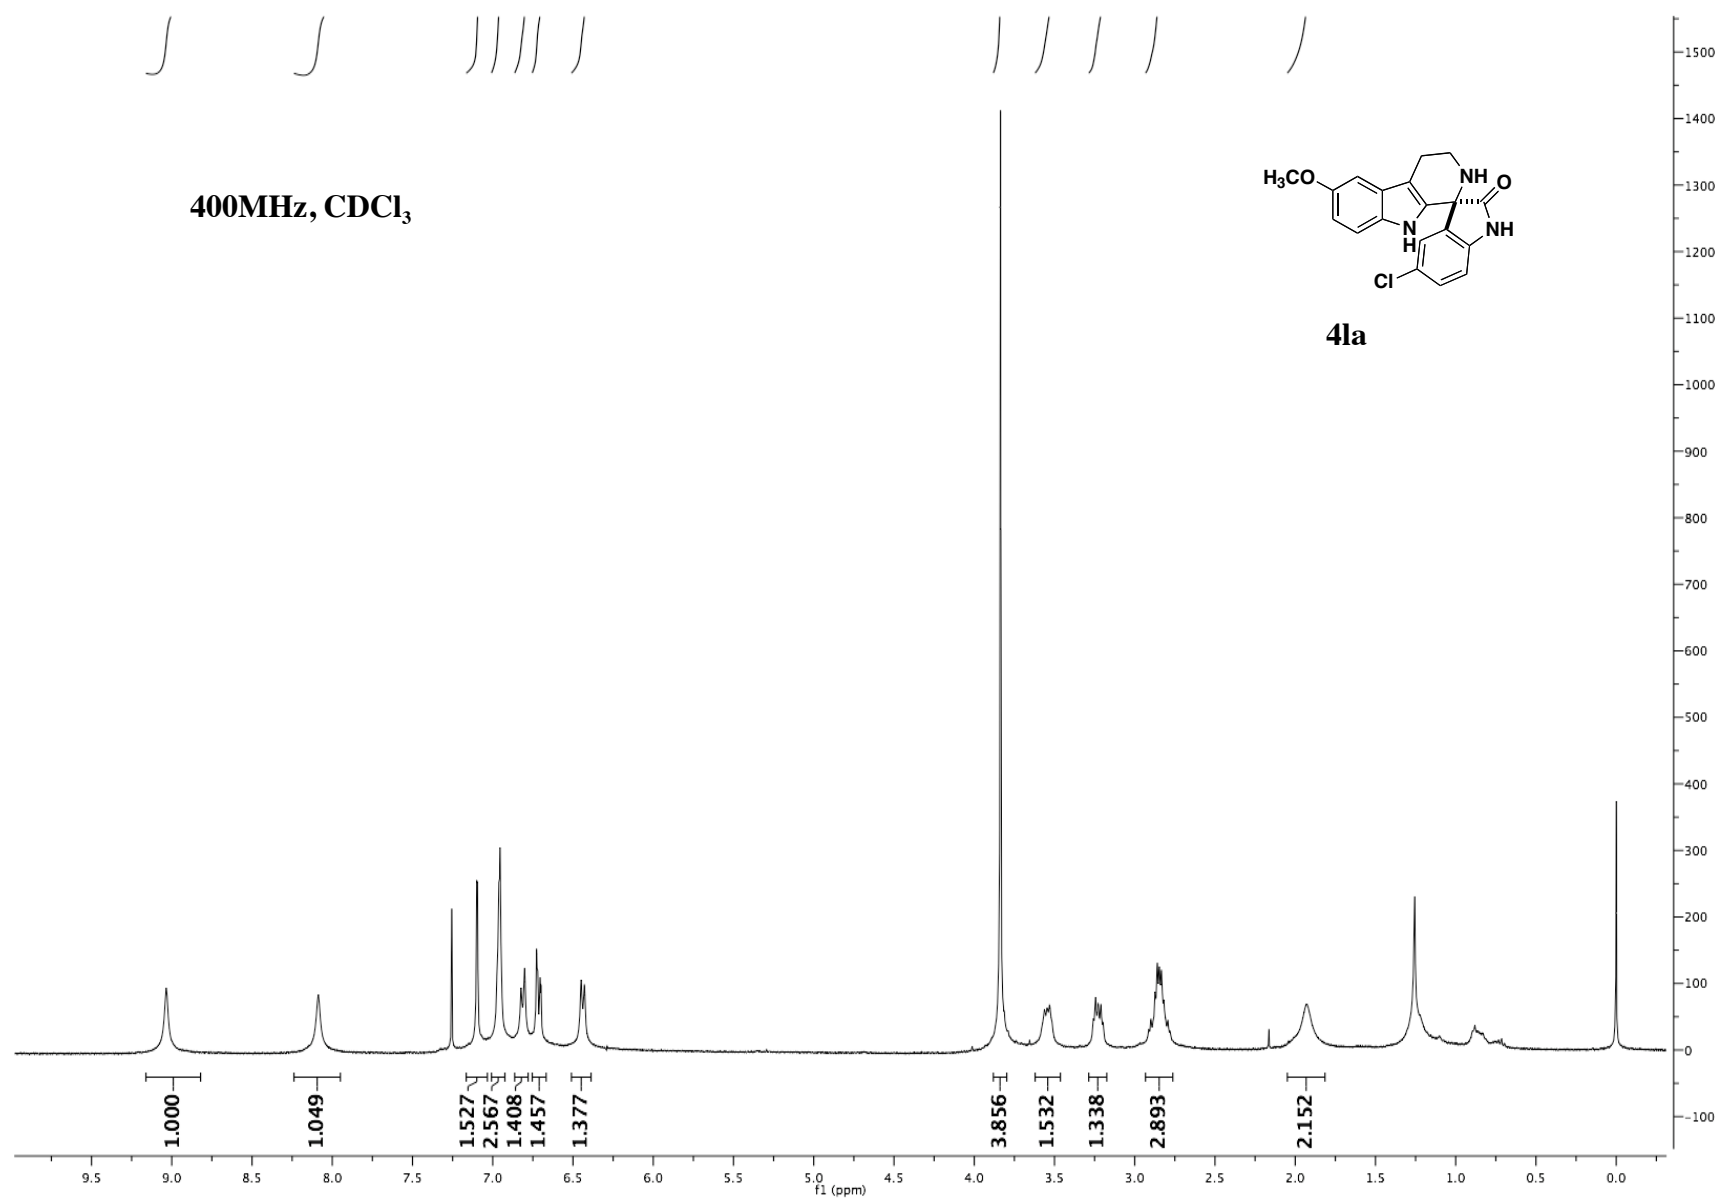

100MHz, CDCl<sub>3</sub>

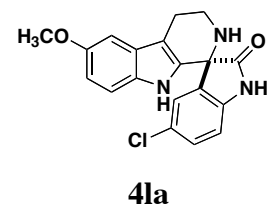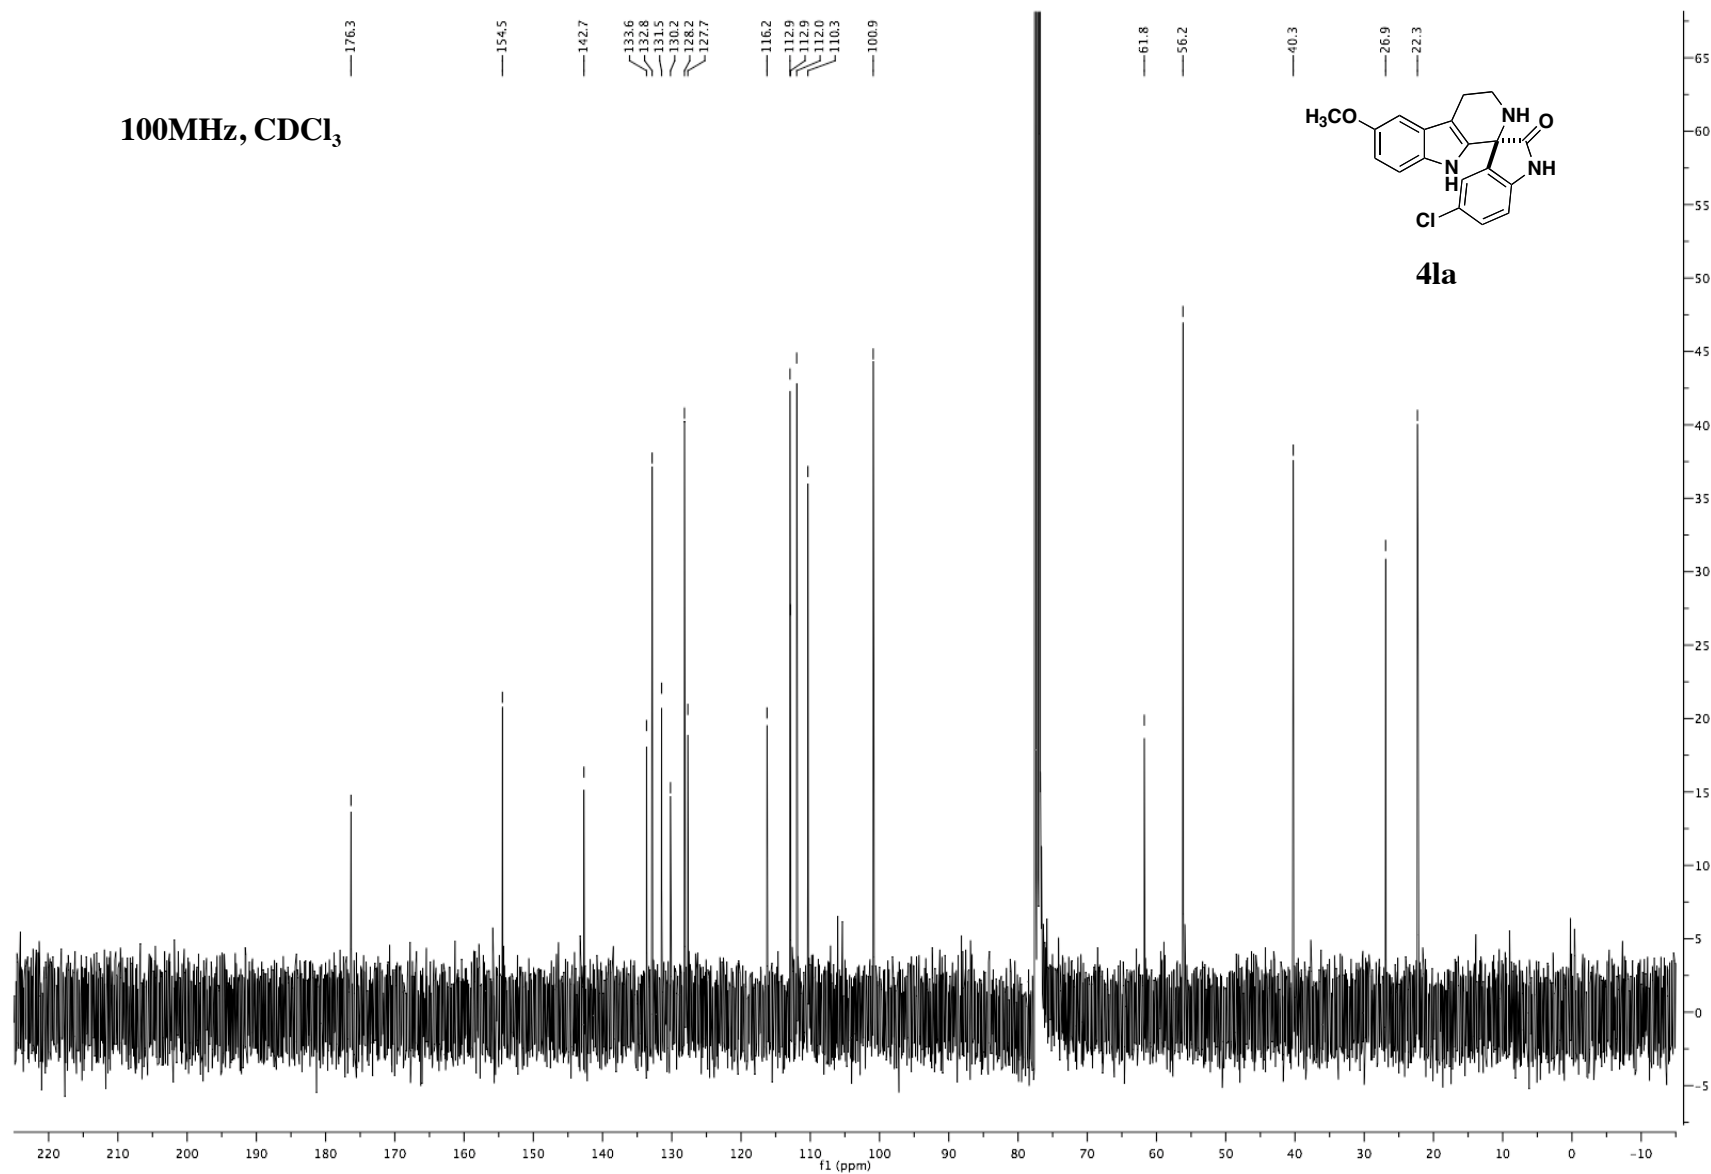

400MHz, CDCl<sub>3</sub>

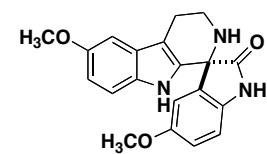

3ma

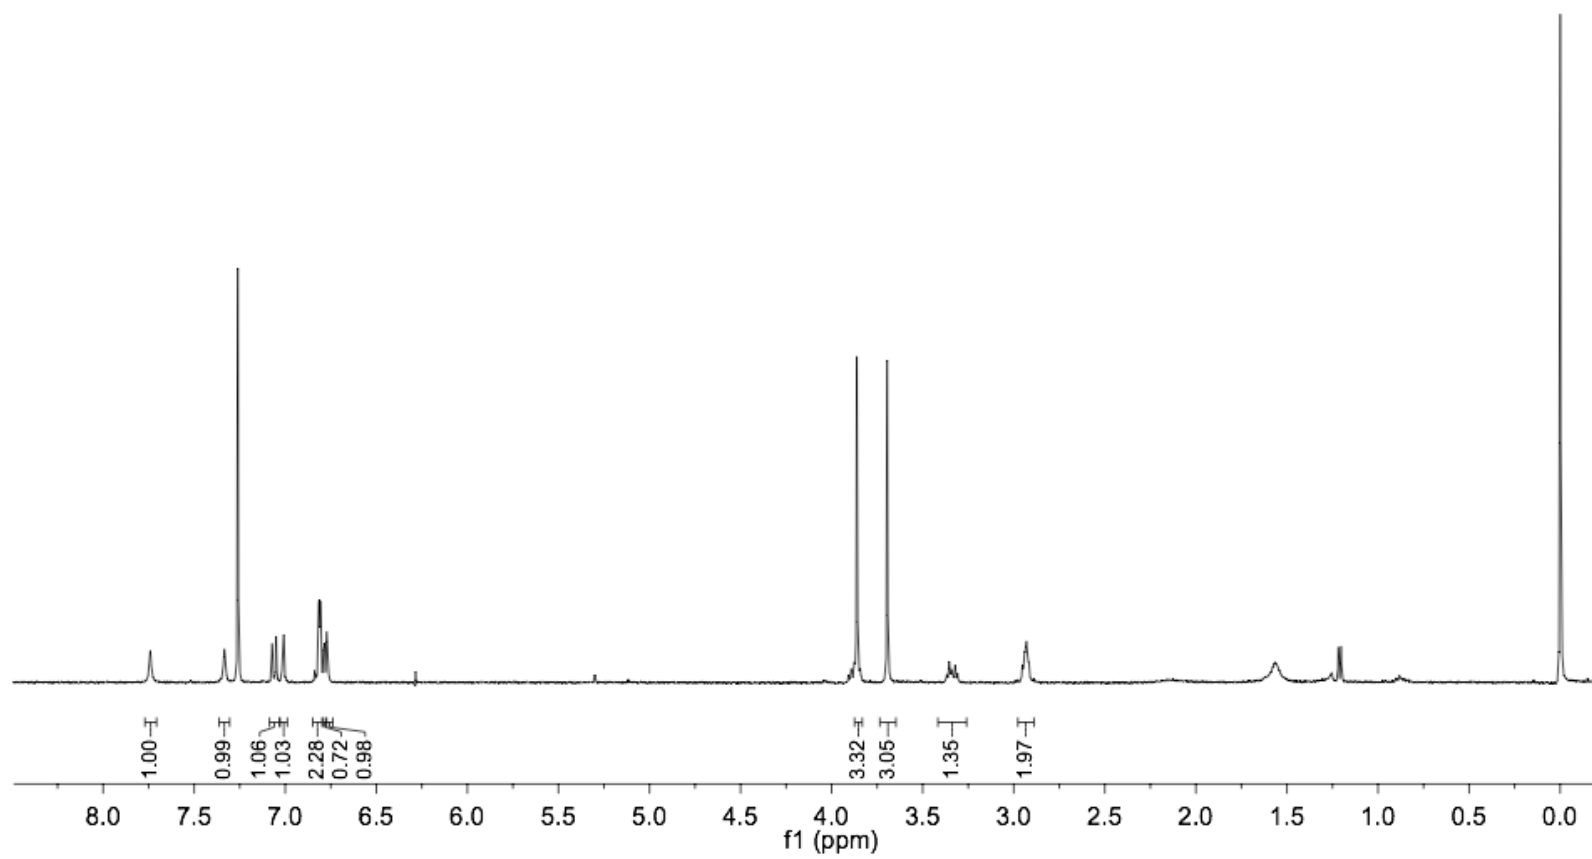

75MHz, CDCl<sub>3</sub>:MeOH (1:1)

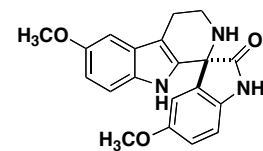

3ma

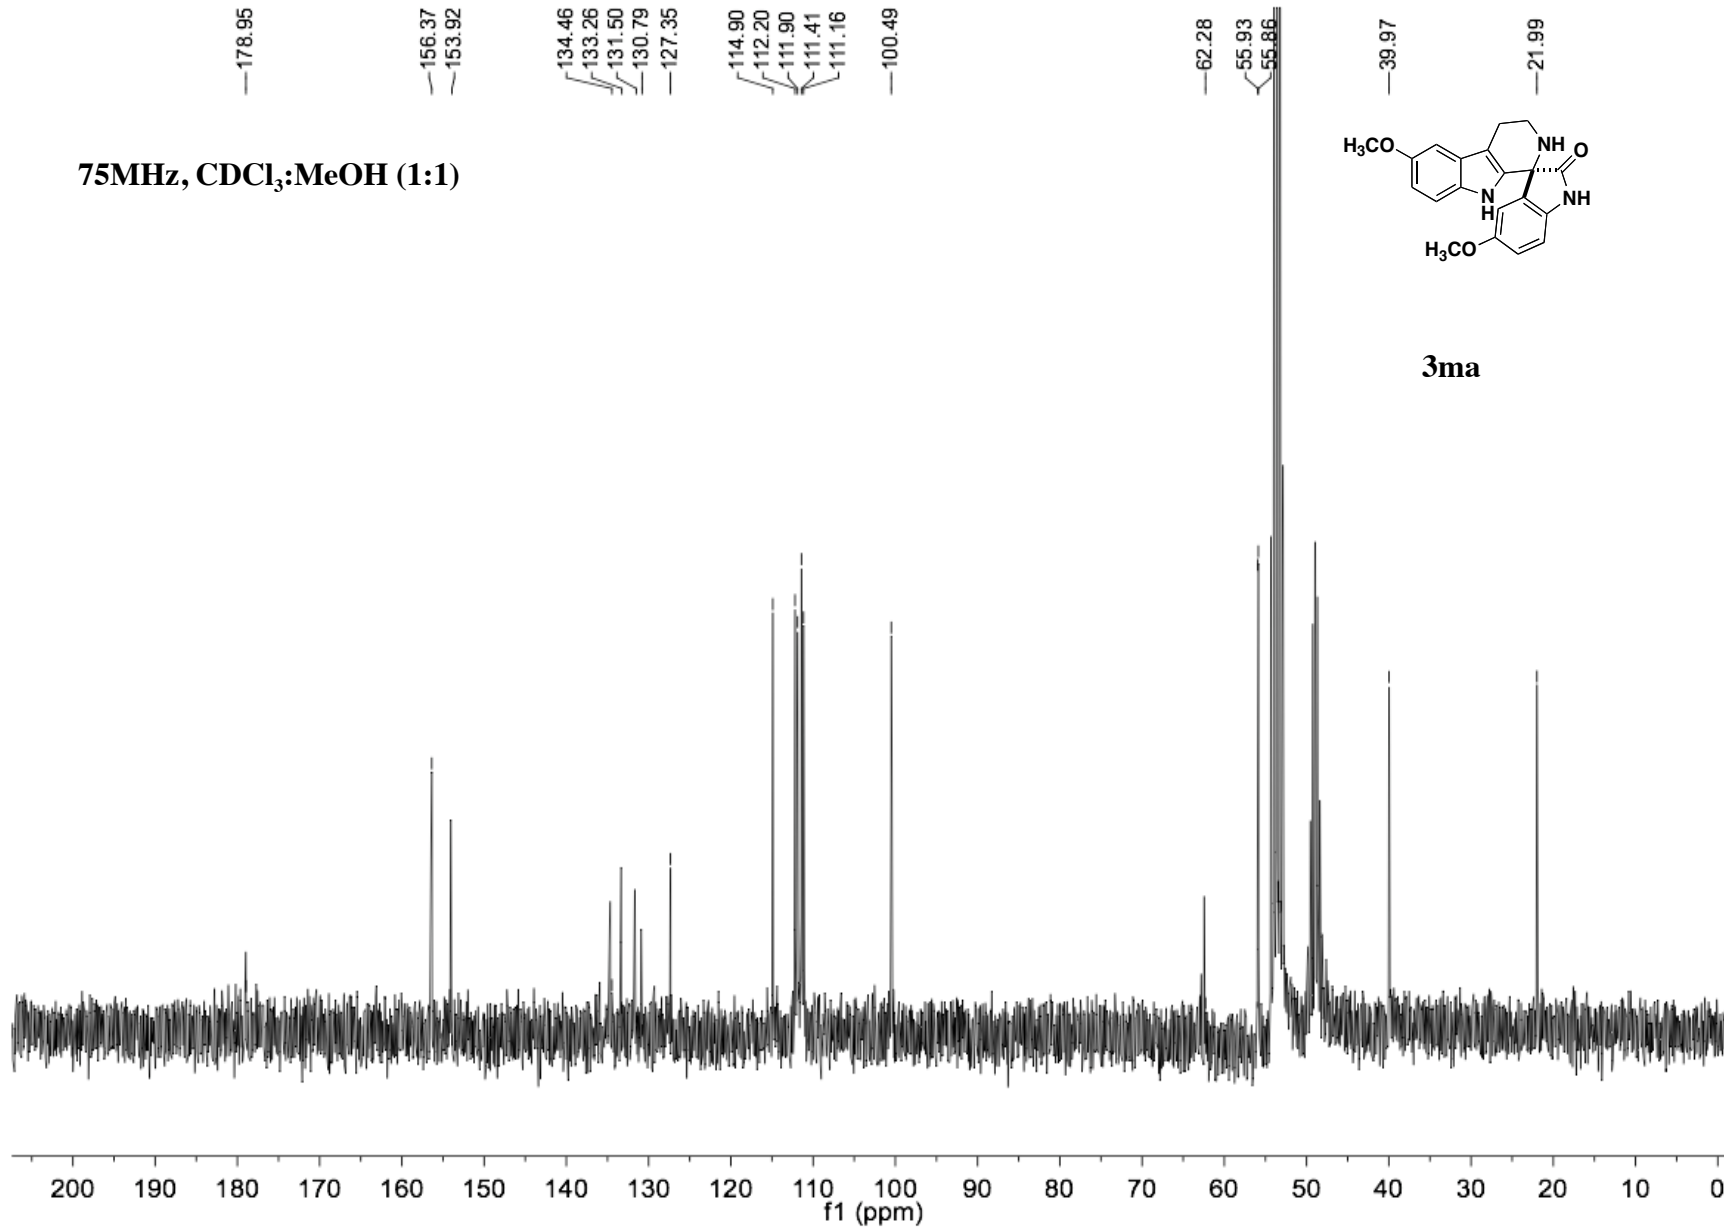

400MHz, CDCl<sub>3</sub>

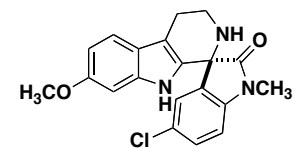

4bb

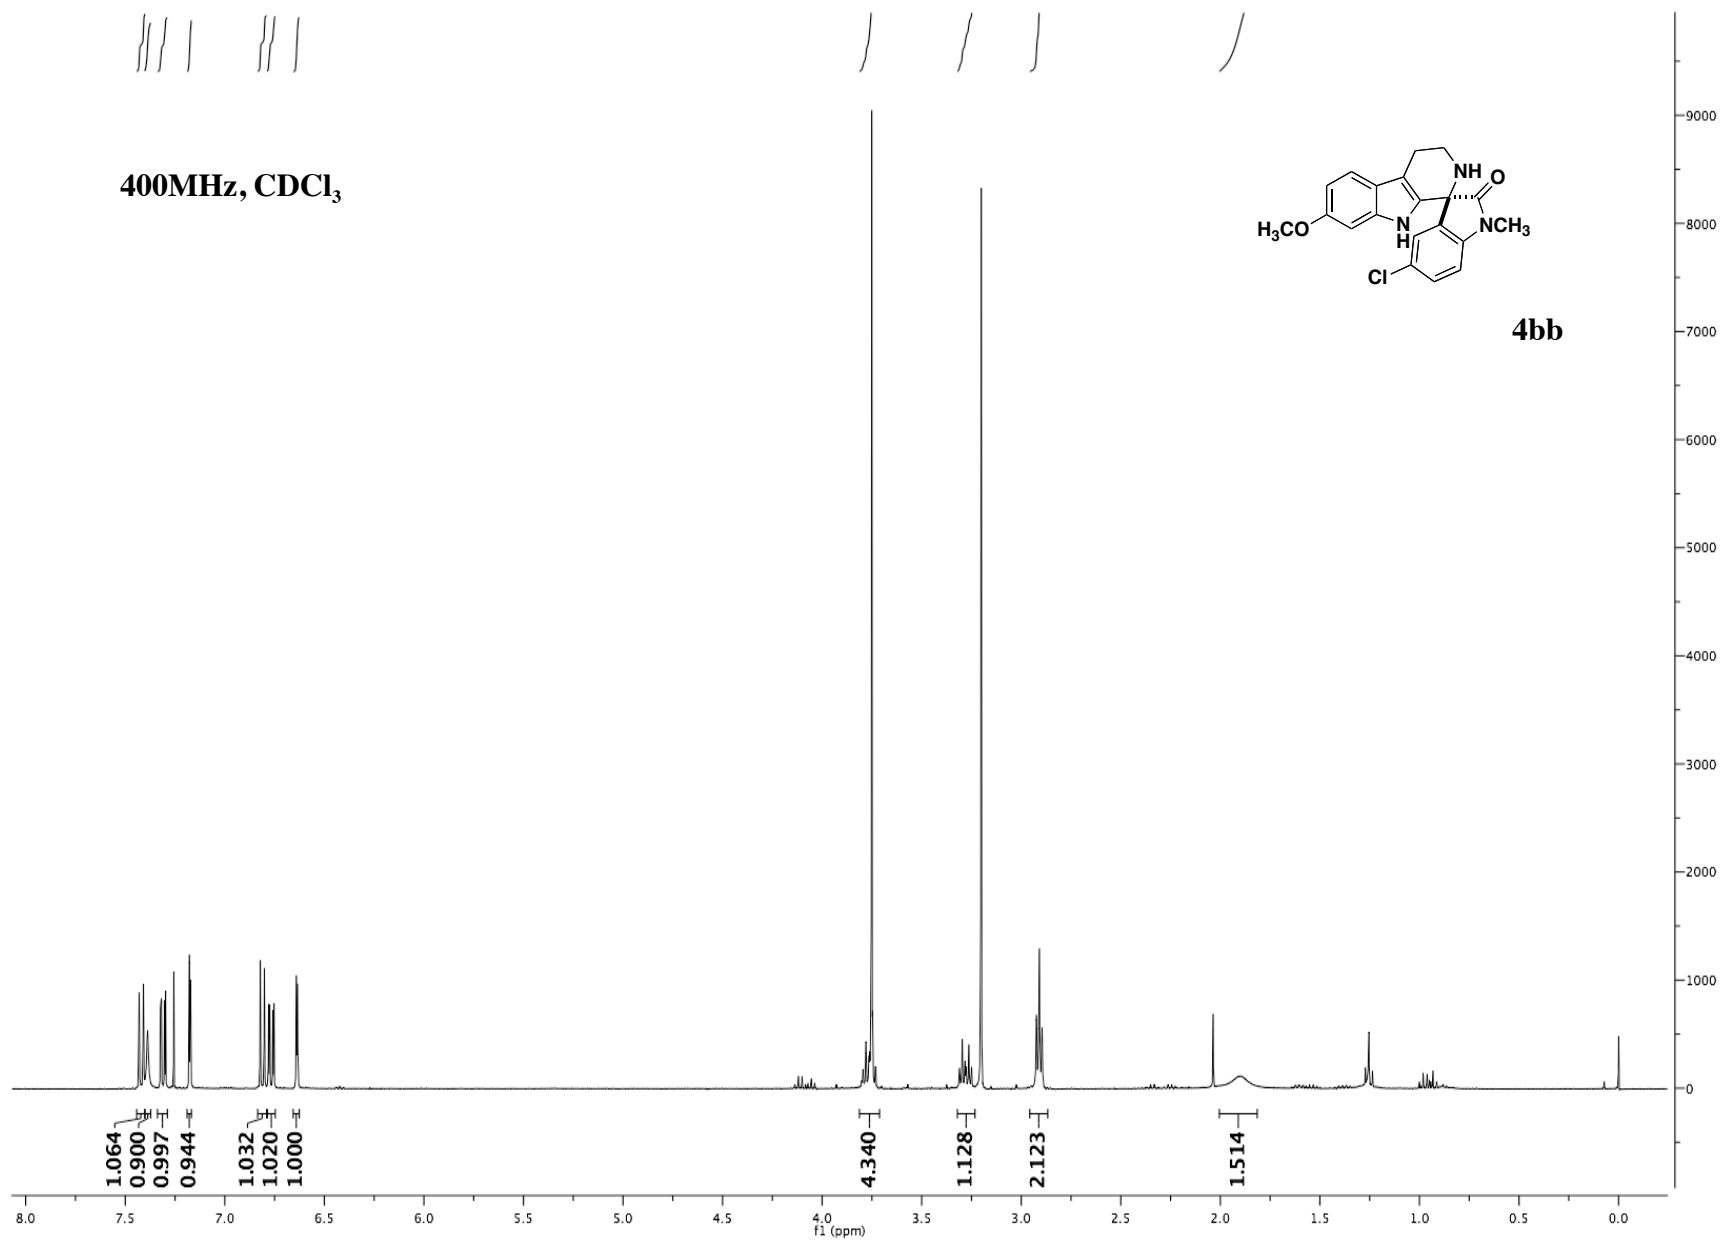

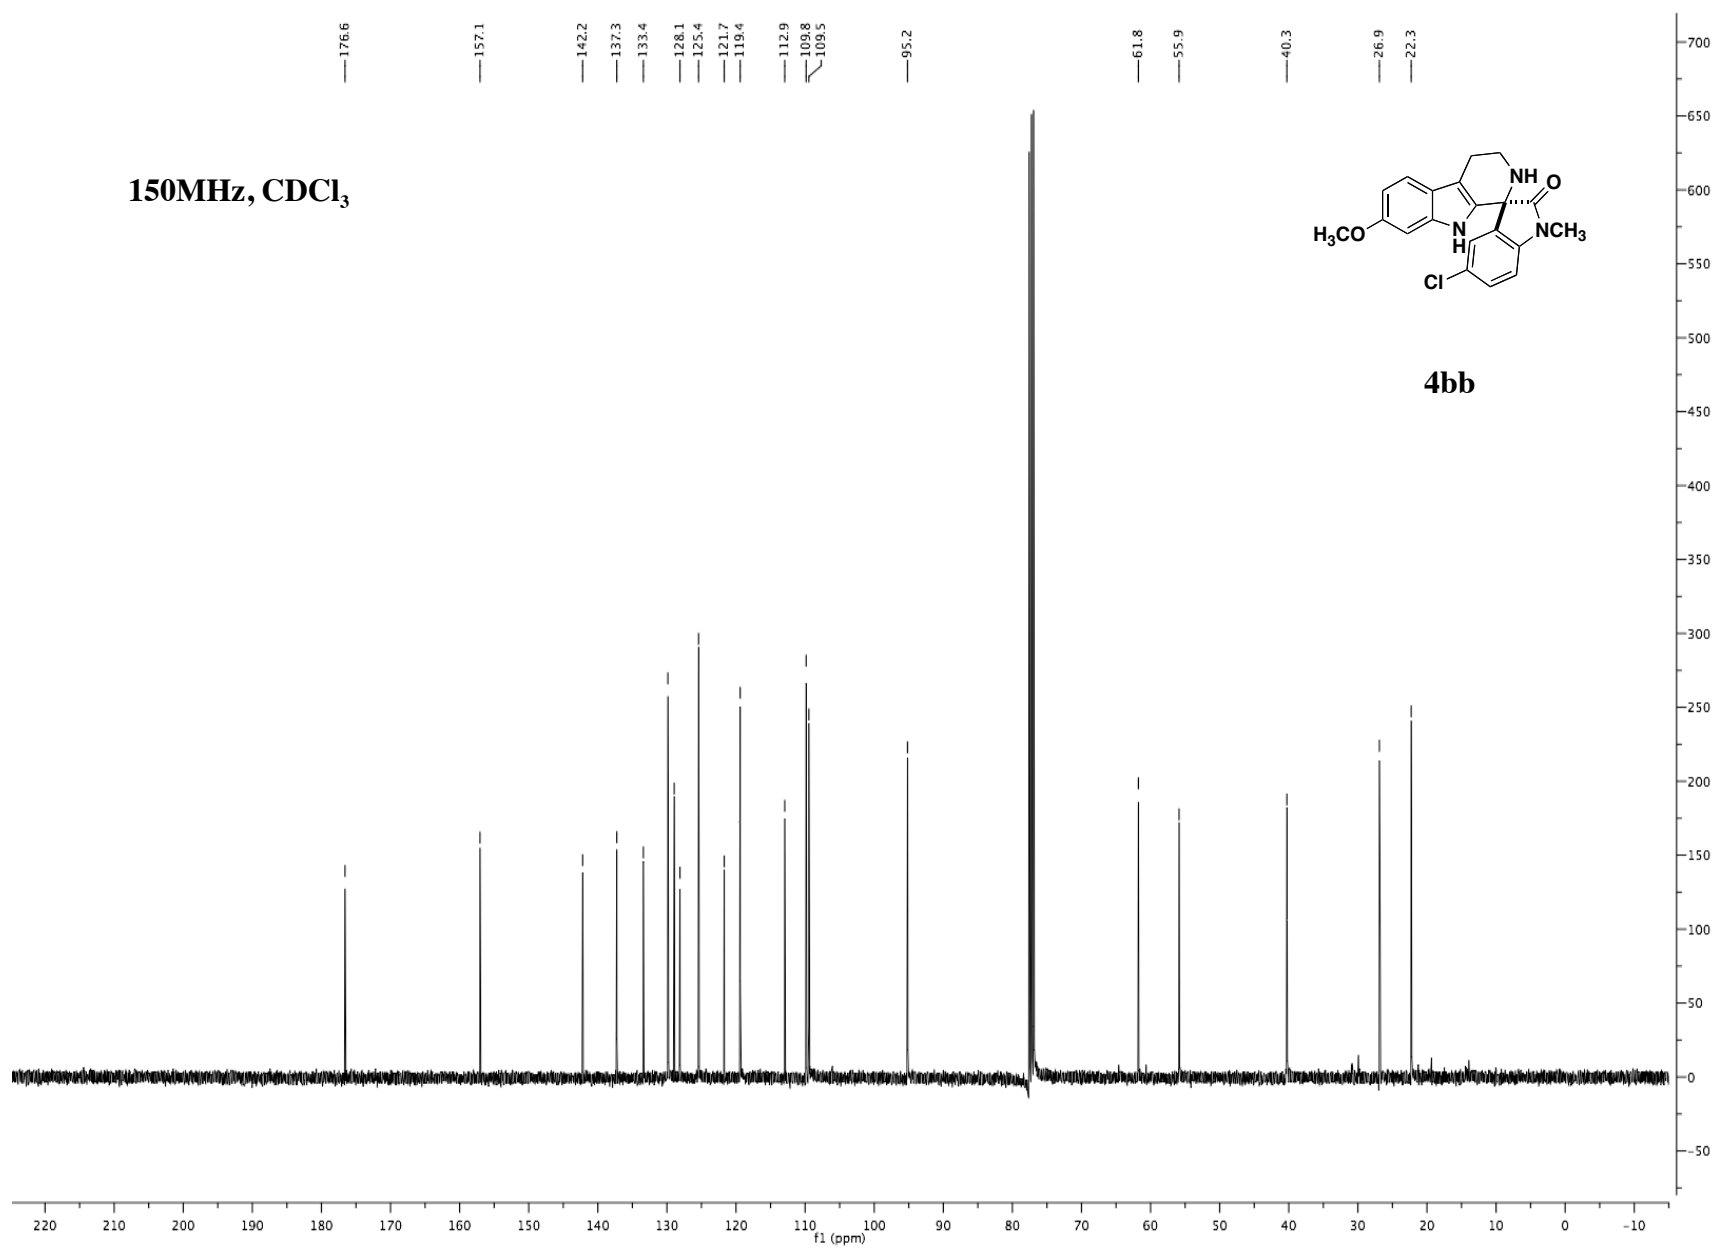

400MHz, CDCl<sub>3</sub>

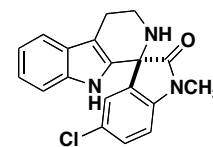

4bc

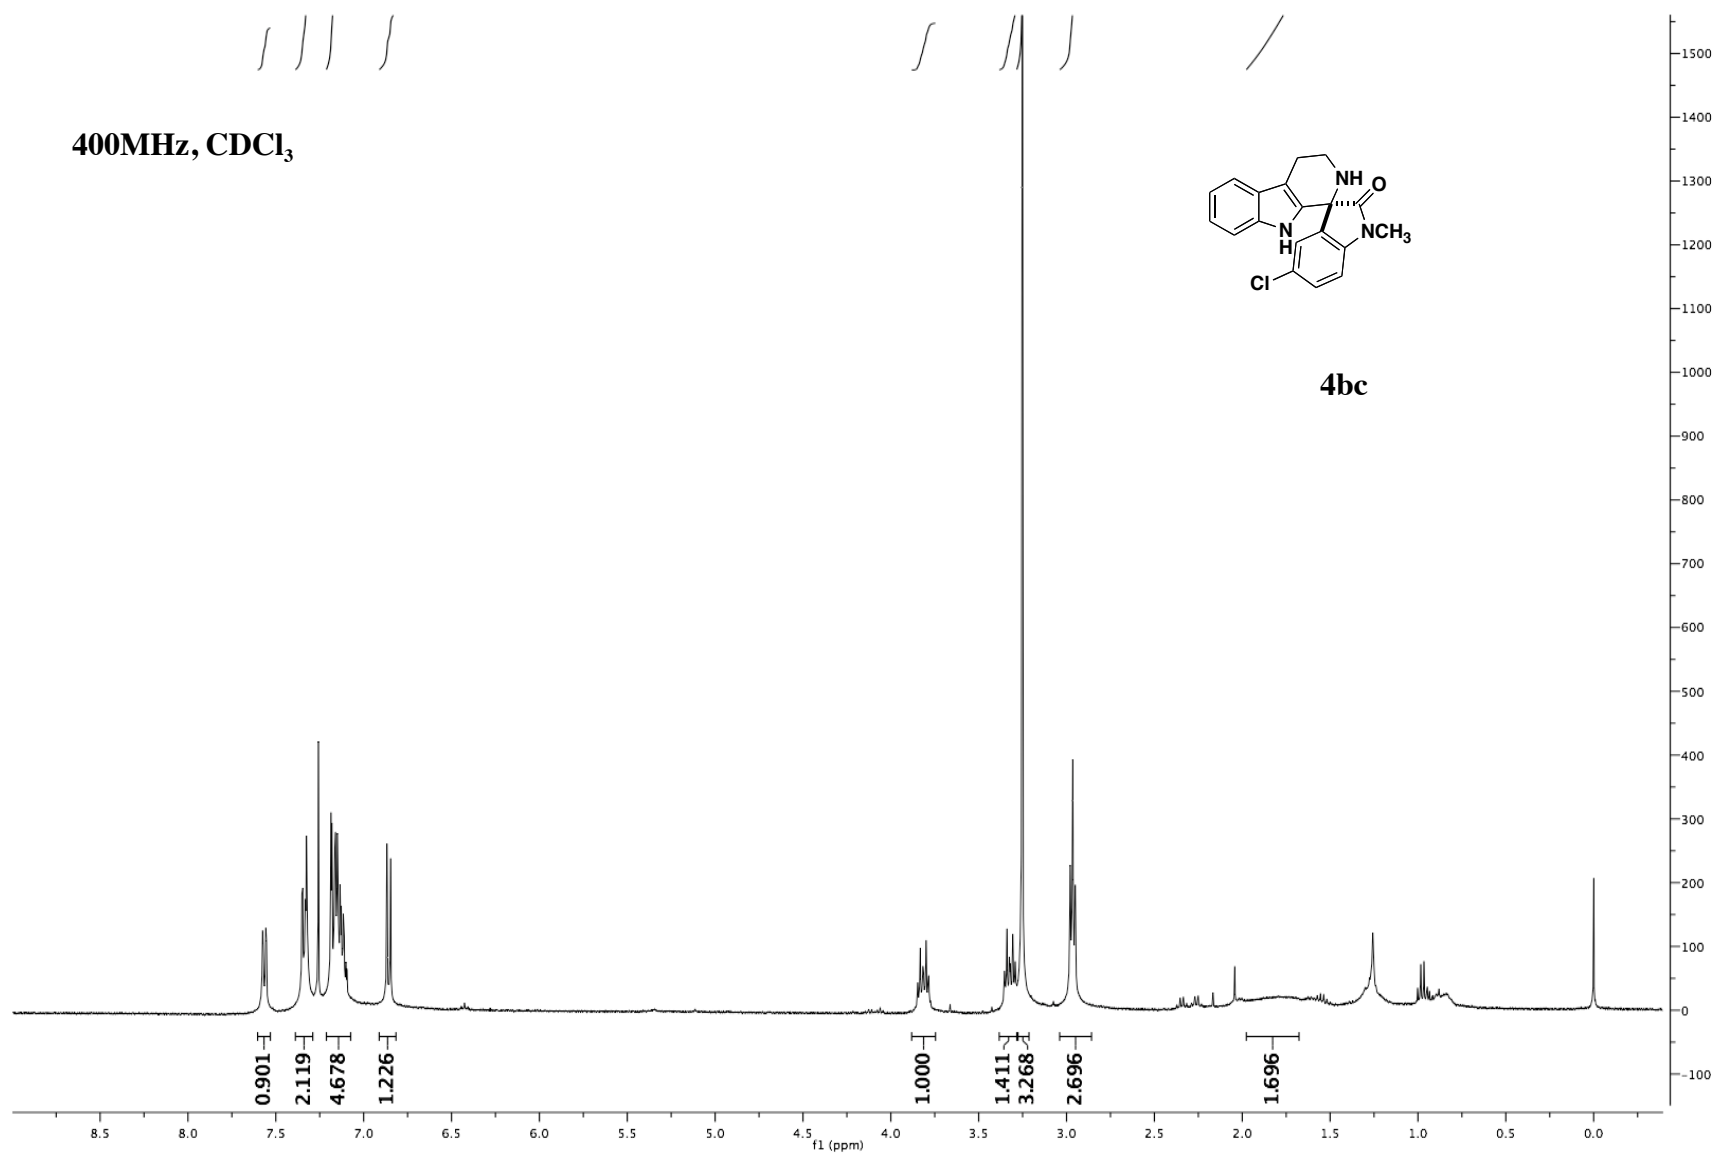

100MHz, CDCl<sub>3</sub>

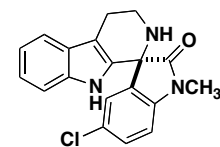

4bc

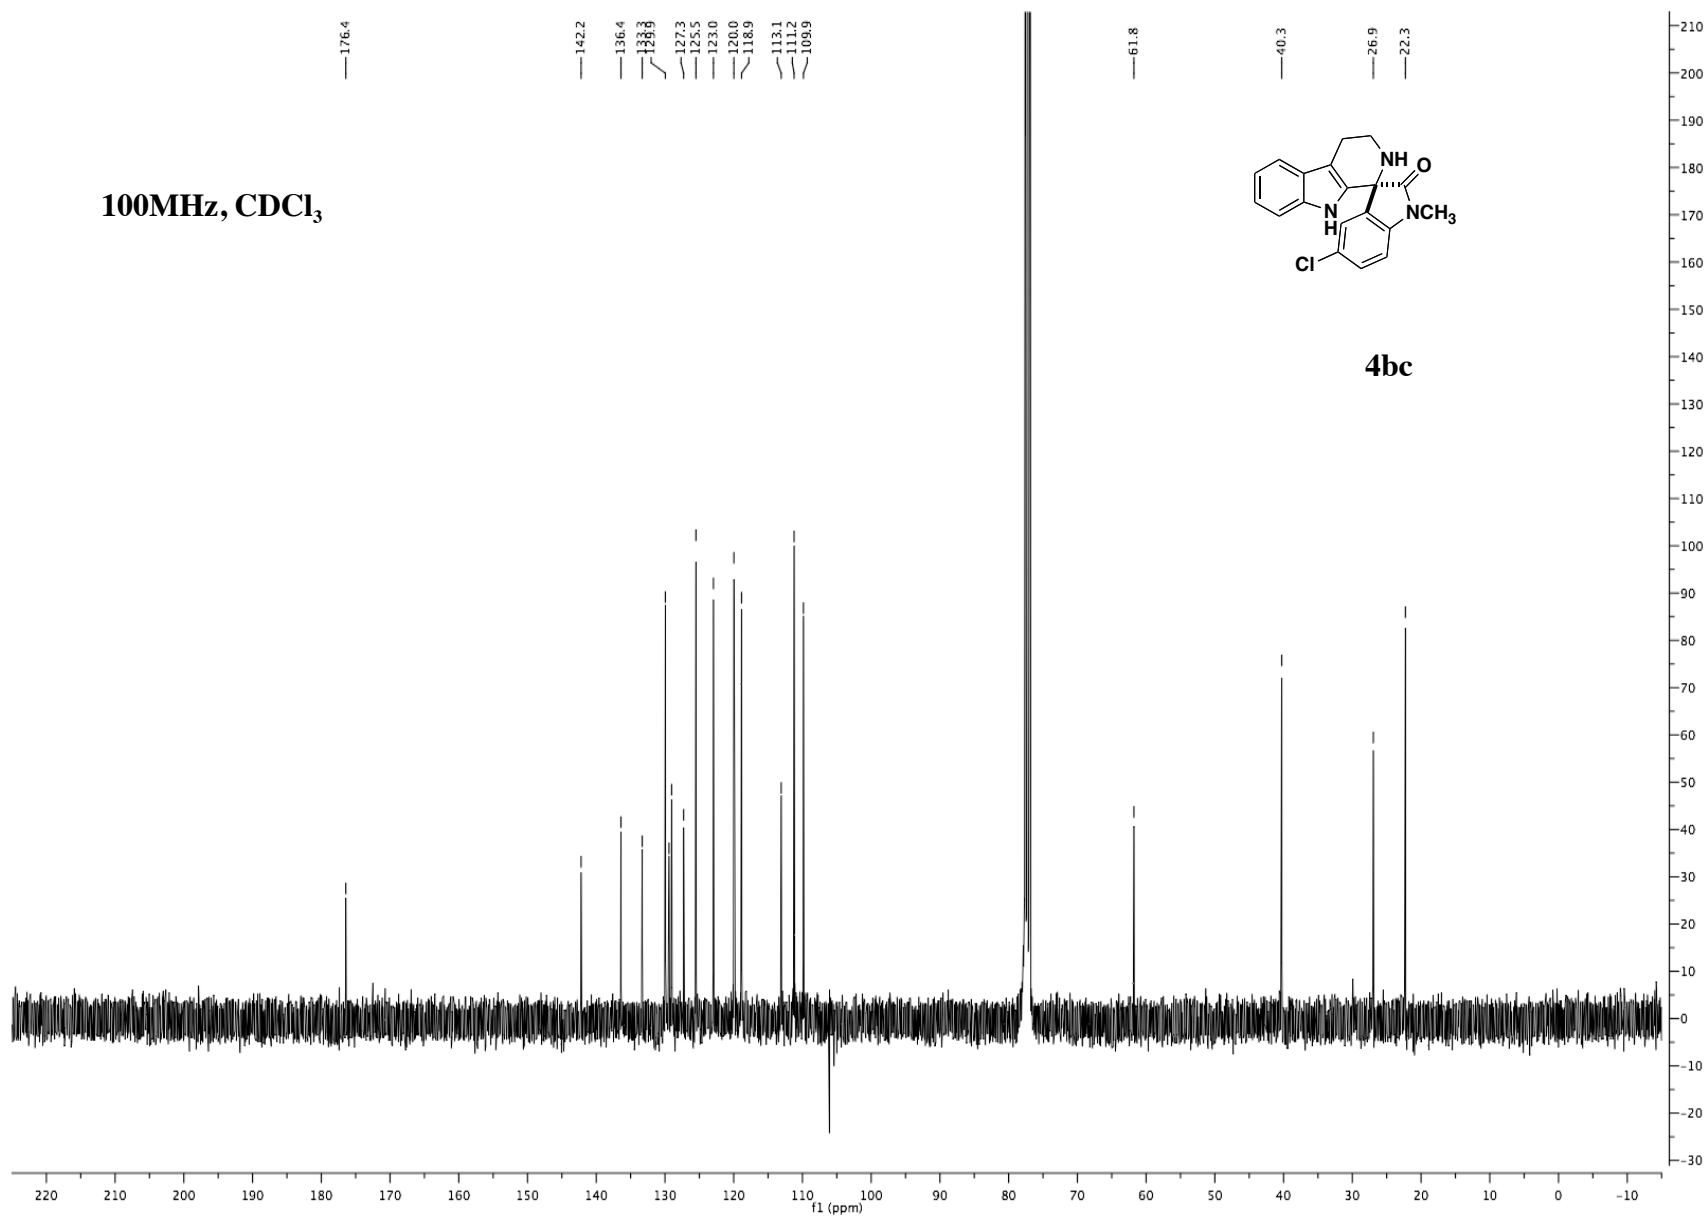

||| | |

| ||| |

|

400MHz, CDCl<sub>3</sub>

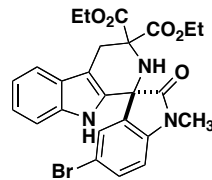

4ad

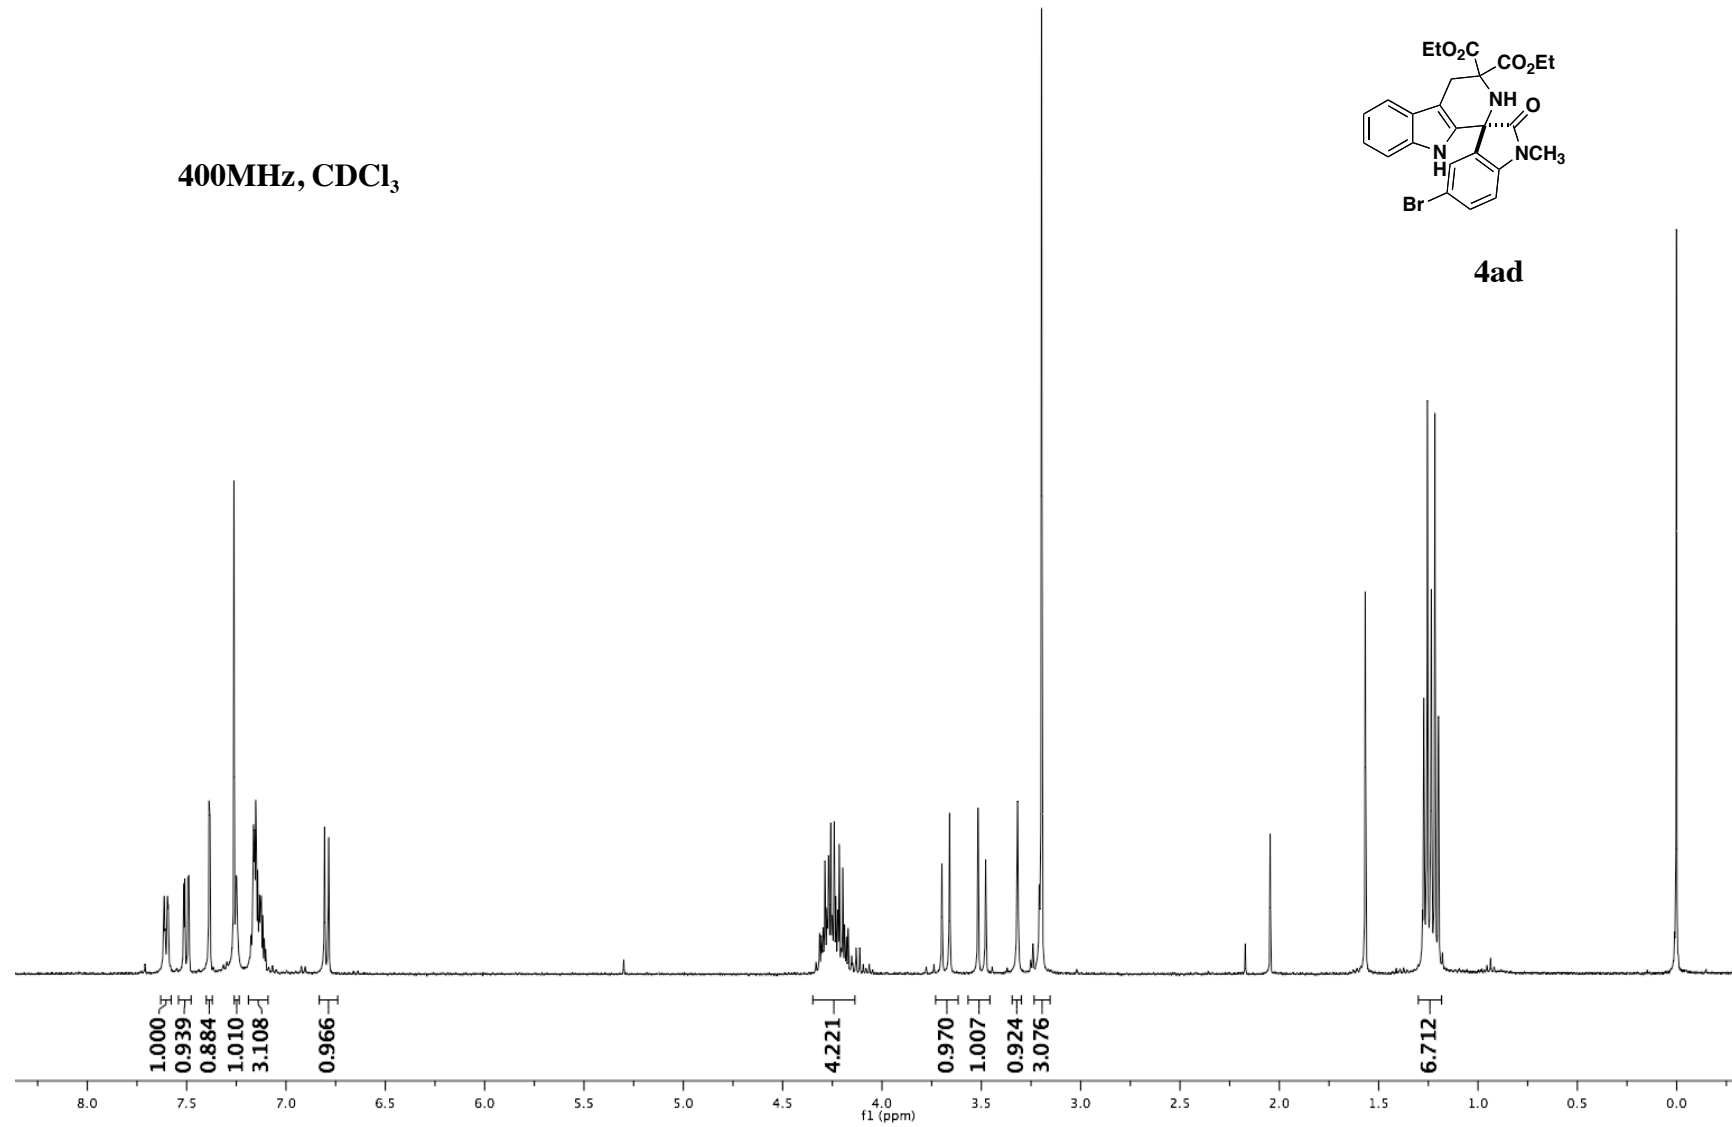

400MHz, CDCl<sub>3</sub>

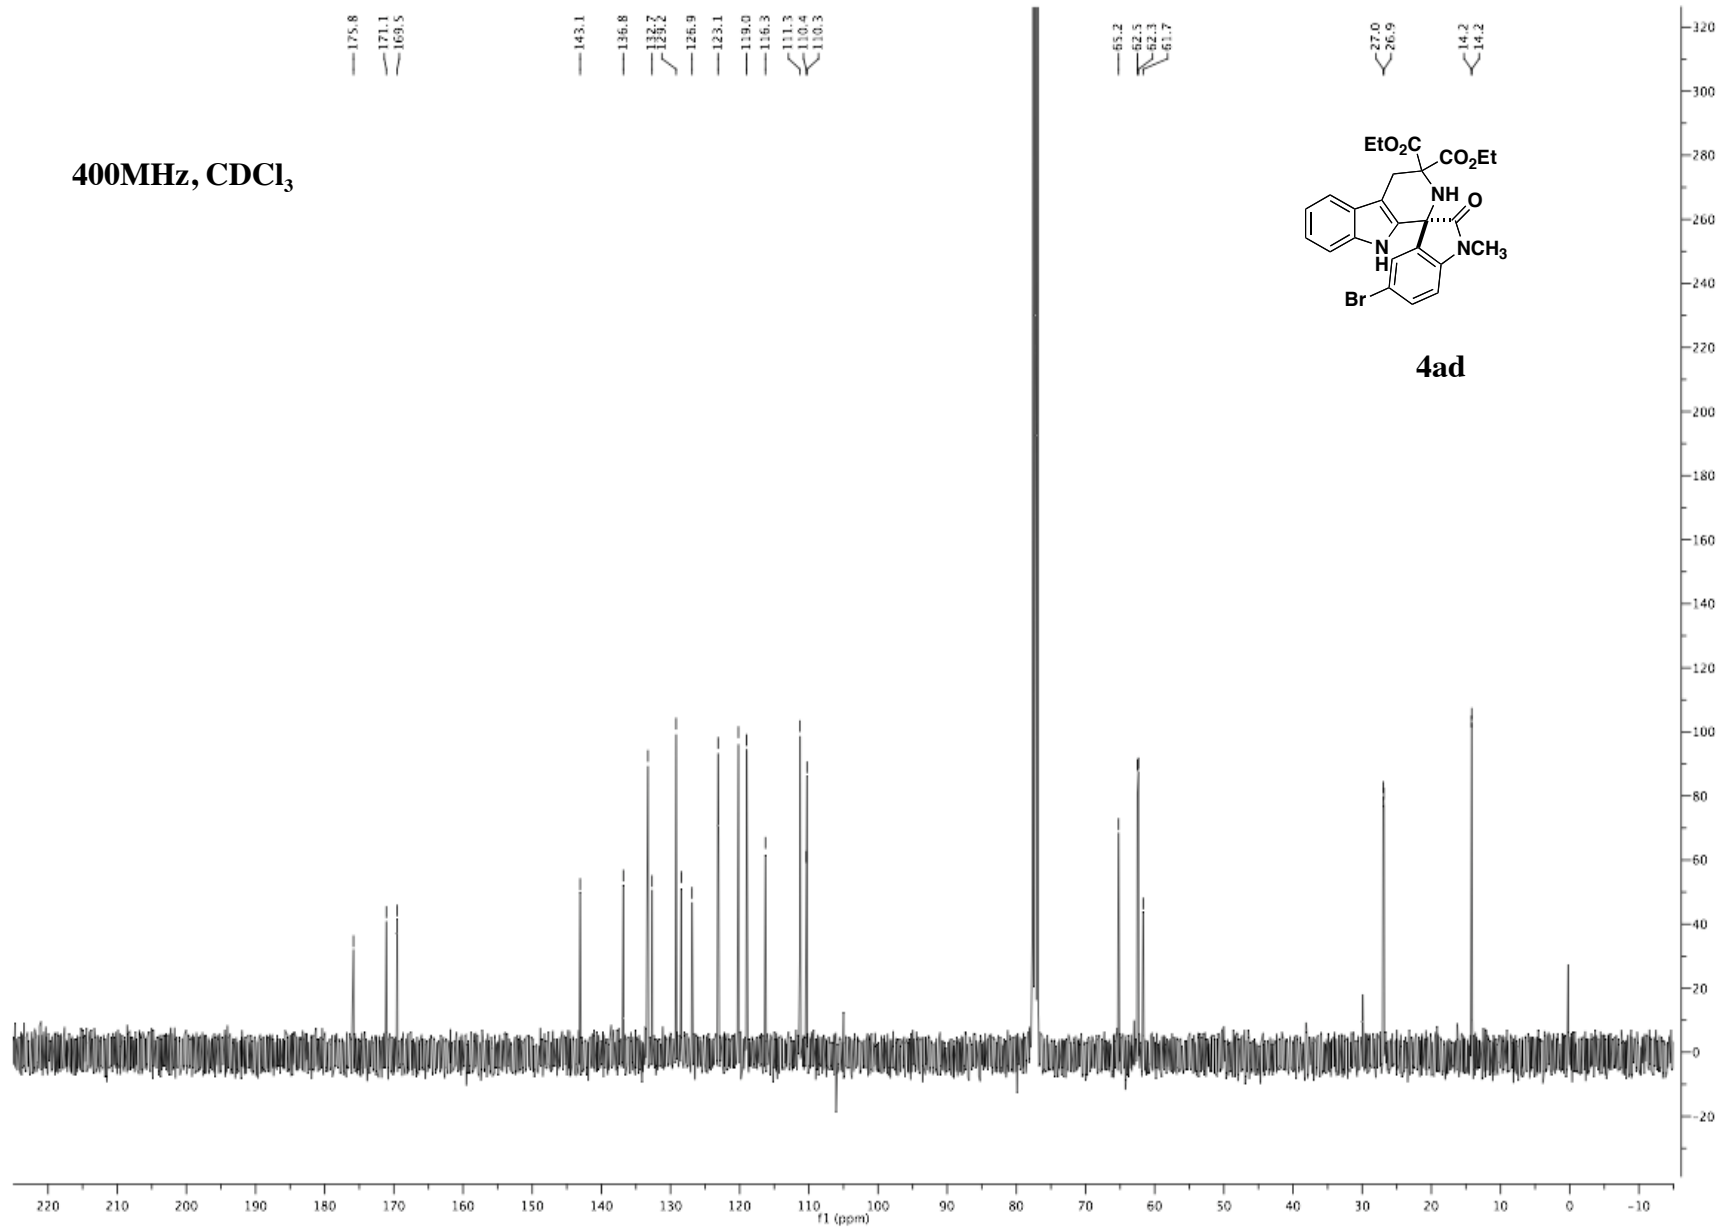

Supplement: NIHMS321845-supplement-01.pdf [file NIHMS321845-supplement-01.pdf]
